# Supplementary material for: Synthesis of highly functionalized 2-thiaspiro[4.5]deca-6,8-dienes via atom efficient tandem Michael addition/Thorpe–Ziegler cyclization
Source: Royal Society of Chemistry journal article supplement (doi:10.1039/c6ra05572a), 2016-01-01
Supplement: c6ra05572a1.pdf [file c6ra05572a1.pdf]

## Synthesis of highly functionalized 2-thiaspiro[4.5]deca-6,8-dienes via atom efficient tandem Michael addition/Thorpe-Ziegler cyclization

Mani Anusha Rani,<sup>a</sup> Sundaravel Vivek Kumar,<sup>a</sup> Somi Santharam Roja,<sup>a</sup> Abdulrahman I. Almansour,<sup>b</sup> Raju Suresh Kumar,<sup>b</sup> S. Athimoolam<sup>c</sup> and Raju Ranjith Kumar<sup>a,\*</sup>

<sup>a</sup>*Department of Organic Chemistry, School of Chemistry, Madurai Kamaraj University, Madurai 625 021, Tamil Nadu, India*

<sup>b</sup>*Department of Chemistry, College of Science, King Saud University, P.O. Box 2455, Riyadh 11451, Saudi Arabia*

<sup>c</sup>*Department of Physics, University College of Engineering, Anna University Constituent College, Nagercoil 629 004, Tamil Nadu, India*

---

### SUPPLEMENTARY CONTENT

| No | Content                                                                 | Page No |
|----|-------------------------------------------------------------------------|---------|
| 1  | Experimental-General                                                    | S2      |
| 2  | General procedure for the synthesis of thiaspirodecadiene <b>1a-x</b>   | S3      |
| 3  | NMR spectra, FT-IR spectra and ESI-mass of all the products <b>1a-x</b> | S4–S51  |
| 4  | Crystallographic data of <b>1v</b>                                      | S52–S54 |

## Experimental

### General

Melting point of the products was measured on Sigma melting point apparatus, Sl. No. 71281, watts-250, volts-230 AC. Open capillary tubes were used for the measurements and are uncorrected. The  $^1\text{H}$ ,  $^{13}\text{C}$ , DEPT, H,H-COSY, C,H-COSY and HMBC spectra were recorded on Bruker (Avance) 300 MHz NMR instrument using TMS as internal standard and  $\text{CDCl}_3$  and/or  $\text{DMSO-D}_6$  as a solvents. Standard Bruker software was used throughout the spectral analysis. Chemical shifts are given in parts per million ( $\delta$ -scale) and the coupling constants are given in Hertz. Electro Spray Ionization Mass Spectrometry (ESI-MS) analyses were recorded in LCQ Fleet, Thermo Fisher Instrument in negative or positive ion mode. The collision voltage and ionization voltage were  $-70\text{ V}$  and  $-4.5\text{ kV}$ , respectively, using nitrogen as atomization and desolvation gas. The desolvation temperature was set at  $300\text{ }^\circ\text{C}$ . The scan range of mass spectrum was  $50\text{--}1100\text{ m/z}$ . The relative amount of each component was determined from the LC-MS chromatogram, using the area normalization method. Infrared spectra were recorded on Shimadzu FT-IR-8400S instrument using neat samples. Elemental analyses were performed on a Perkin Elmer 2400 Series II Elemental CHNS analyzer. Silica gel-G plates (Merck) were used for TLC analysis with a mixture of petroleum ether ( $60\text{--}80\text{ }^\circ\text{C}$ ) and ethyl acetate as the eluent. All the chemicals were purchased from Sigma-Aldrich, Alfa-Aesar or Merck and used without further purification. The entire crystallographic calculations of compound **1v** were done with Bruker AXS KAPPA APEX-2 diffractometer equipped with graphite monochromator. The structure was solved by direct methods and refined by full-matrix least-squares calculations using SHELXL-2014. Reliability index (R-factor) for  $F^2 > 2\sigma(F^2)$  is found to be 5.92%, which confirms the convergence of the reliable structure.

### General procedure for the synthesis of 2-thiaspiro[4.5]deca-6,8-dienes **1a-x**

A mixture of 2,4-bis((*Z*)-arylidene)dihydrothiophen-3(2*H*)-one **3** (1 mmol) and 2-(1-arylethylidene)malononitrile **4** (1 mmol) was taken in ethanol (10 mL) to which triethylamine (1.0 equiv.) was added. The reaction mixture was stirred at ambient temperature (28 °C) for 30 minutes and the reaction progress was monitored by TLC analysis. After completion of the reaction, the precipitate obtained was filtered and washed with cold ethanol and dried under vacuum to obtain the product **1** as yellow solid.

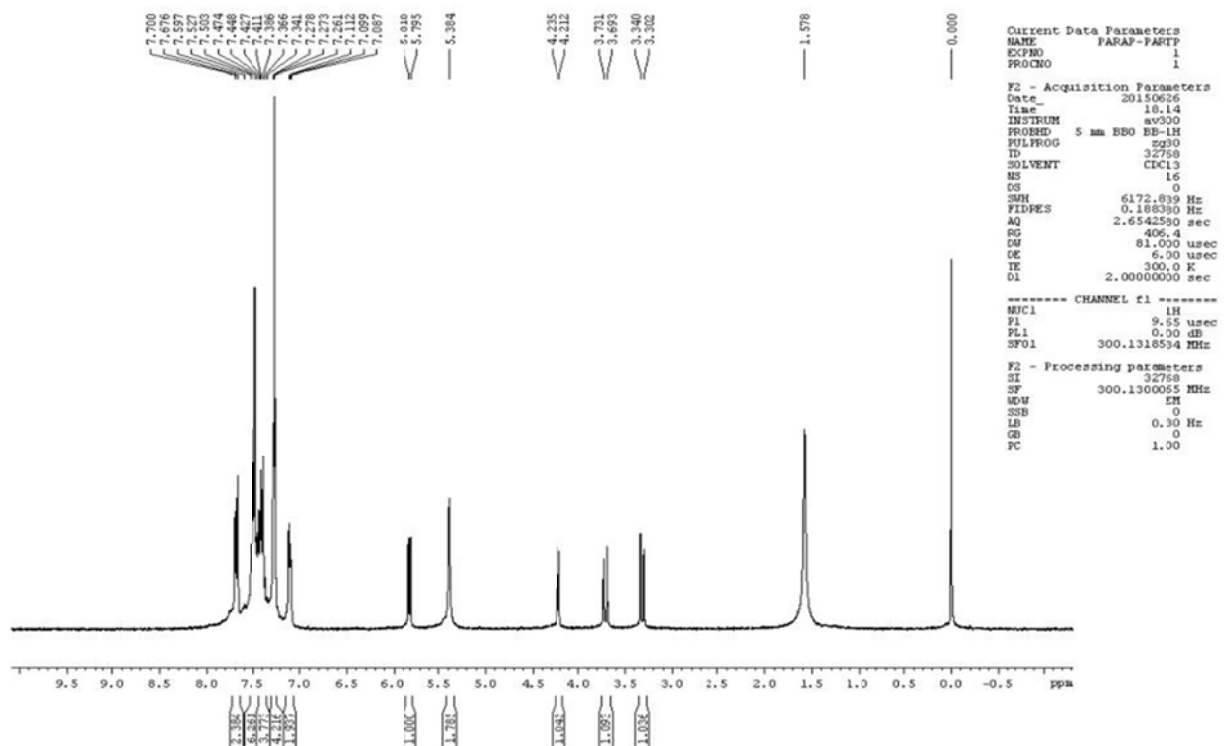

Figure 1.  $^1\text{H}$  NMR spectrum of **1a**

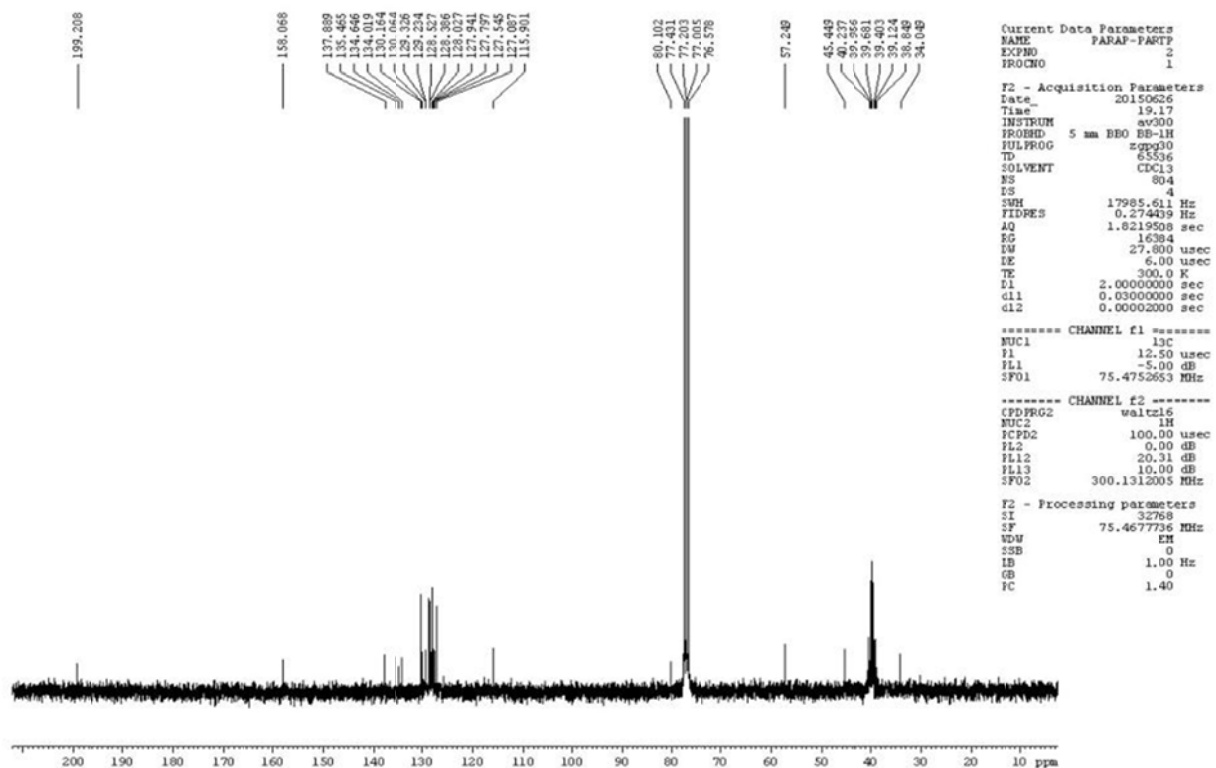

Figure 2.  $^{13}\text{C}$  NMR spectrum of **1a**

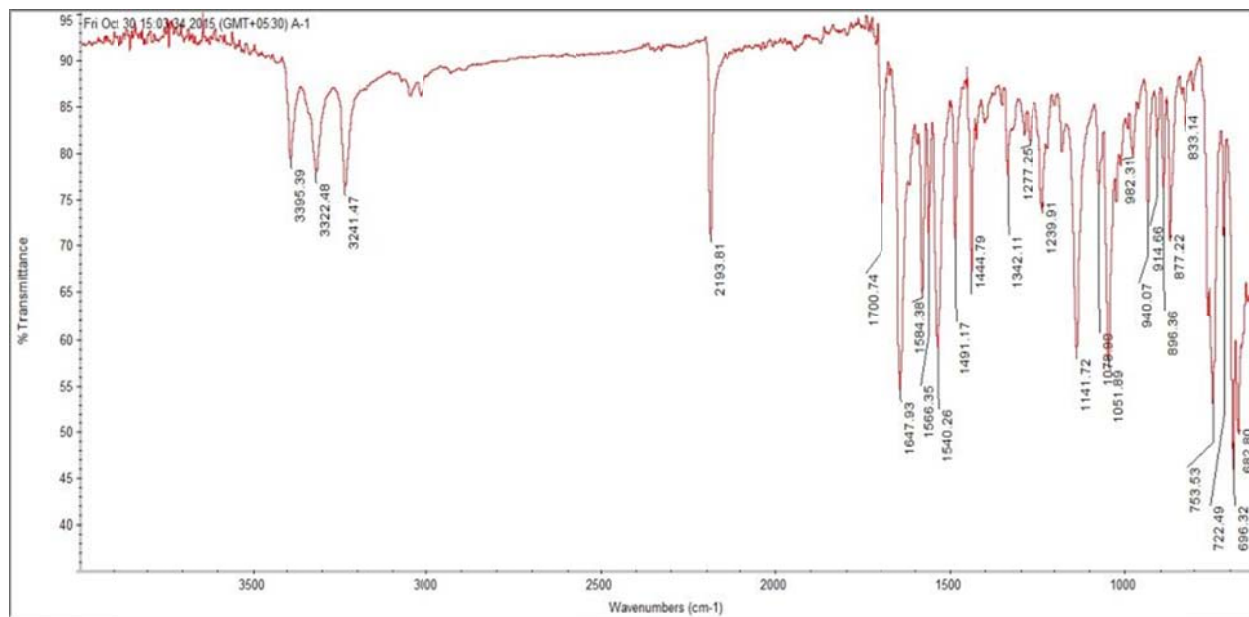

**Figure 3.** FT-IR spectrum of **1a**

A1 #24 RT: 0.34 AV: 1 NL: 1.13E3  
T: ITMS - c ESI Full ms [50.00-1100.00]

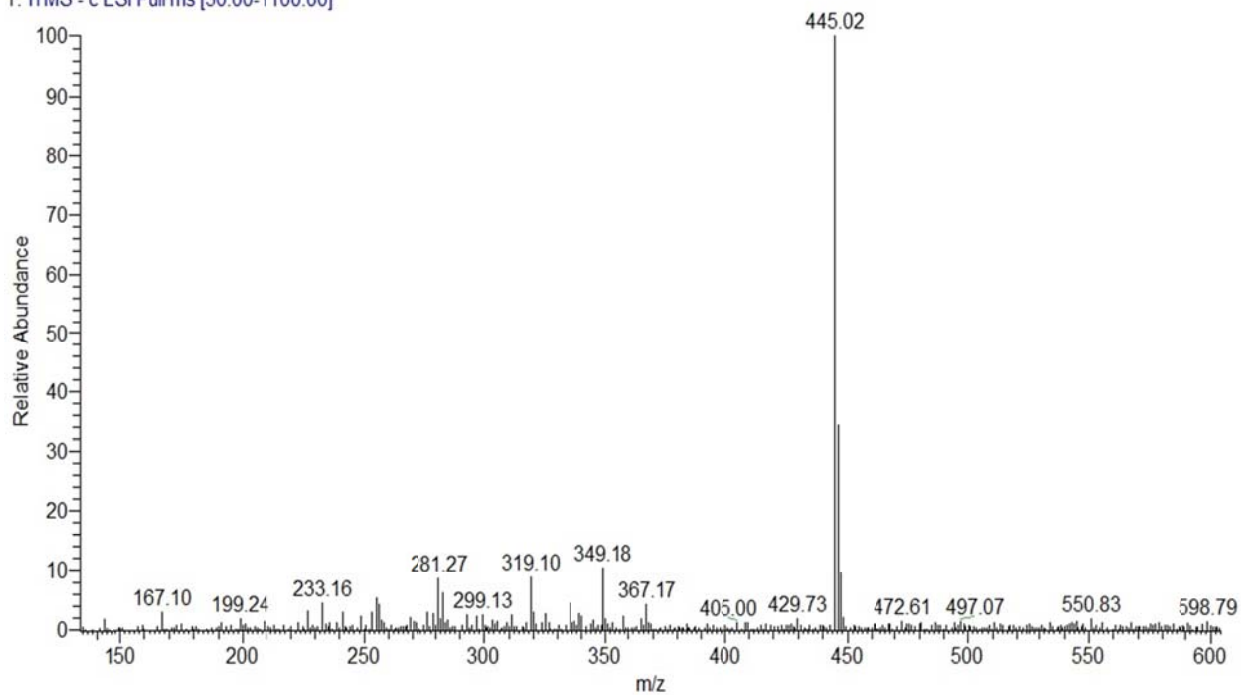

**Figure 4.** ESI-mass of **1a**



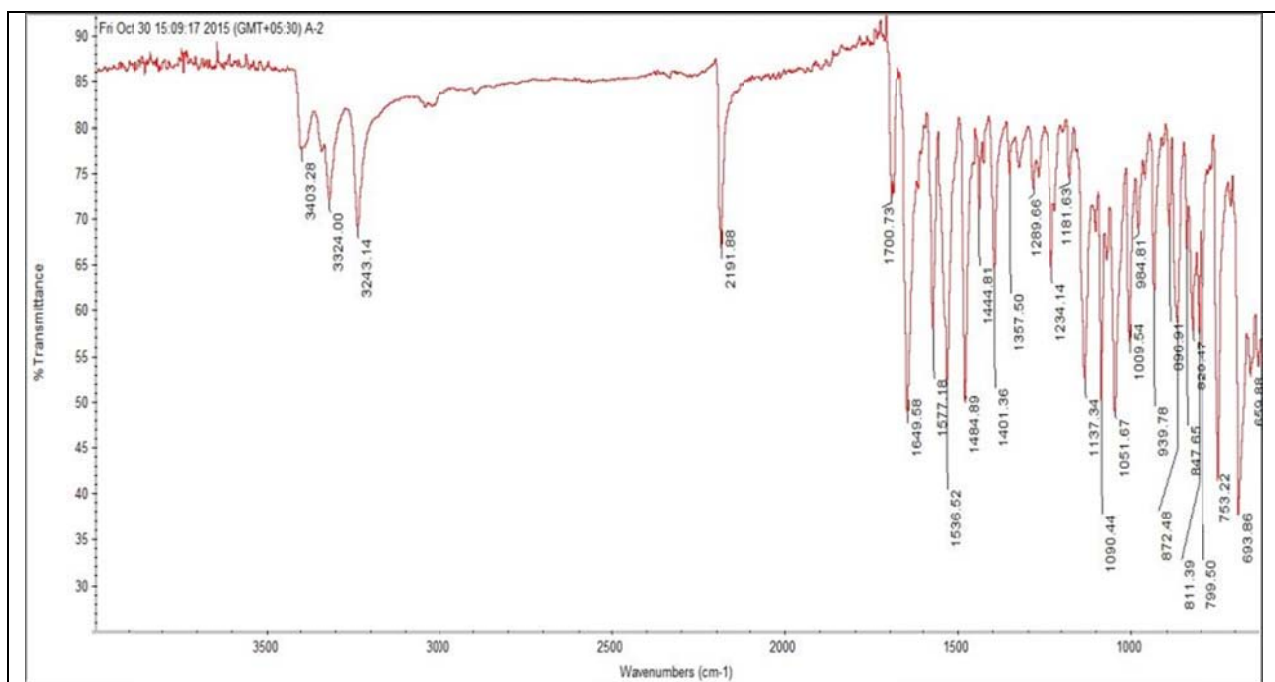

**Figure 7.** FT-IR spectrum of **1b**

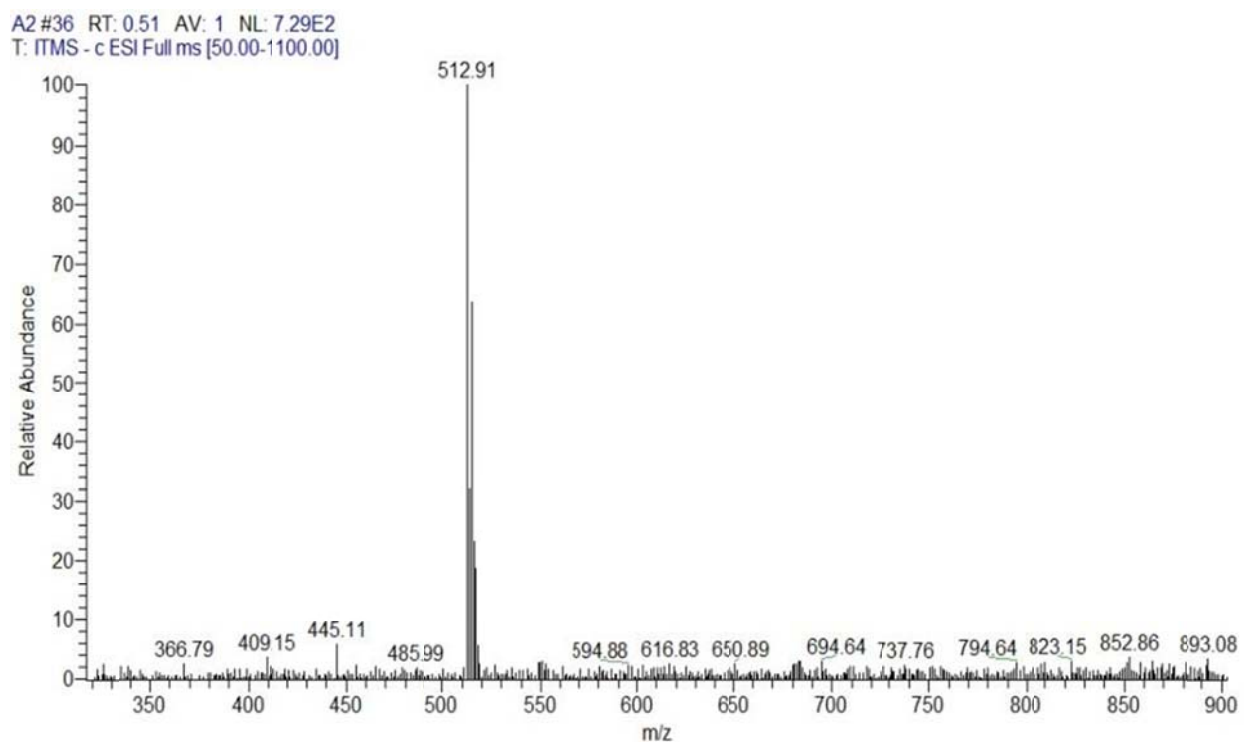

**Figure 8.** ESI-massof **1b**

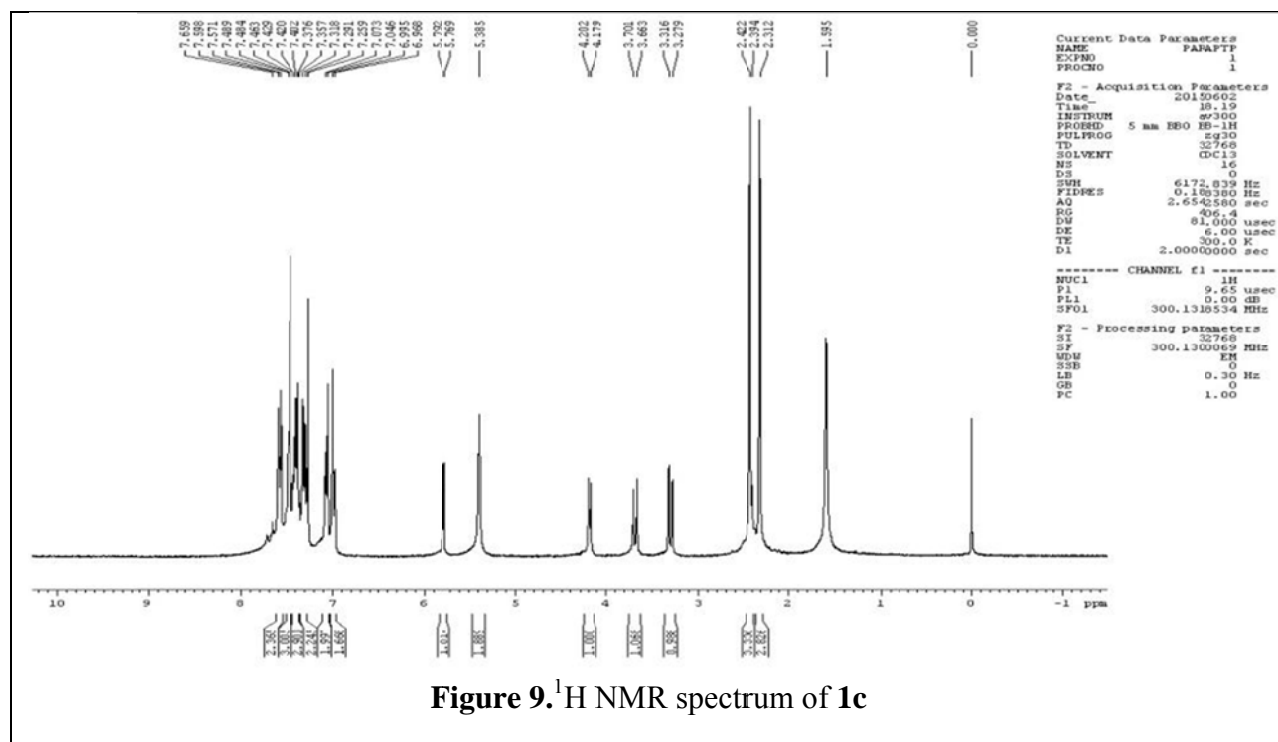

Figure 9.  $^1\text{H}$  NMR spectrum of **1c**

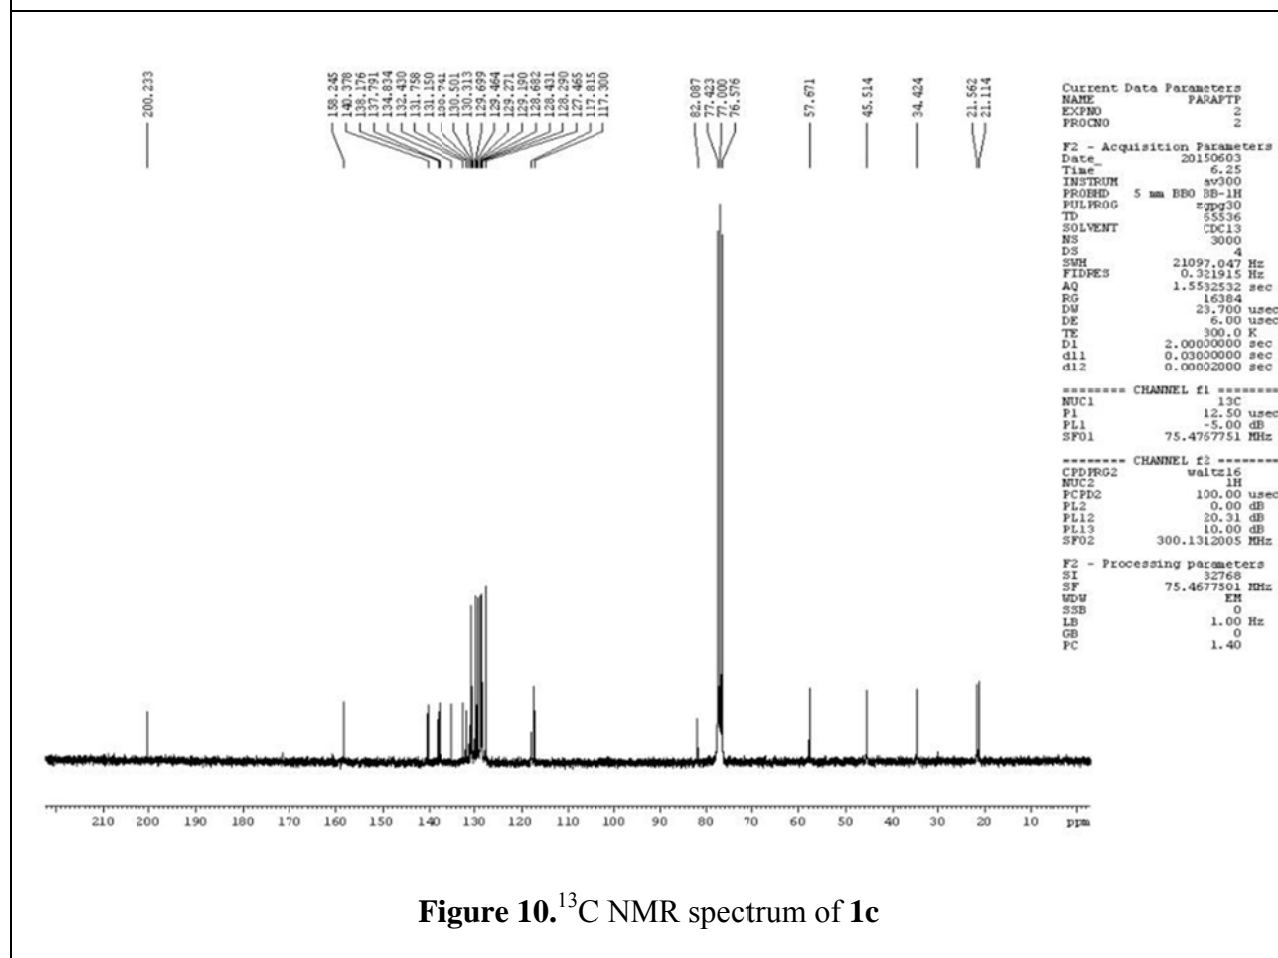

Figure 10.  $^{13}\text{C}$  NMR spectrum of **1c**



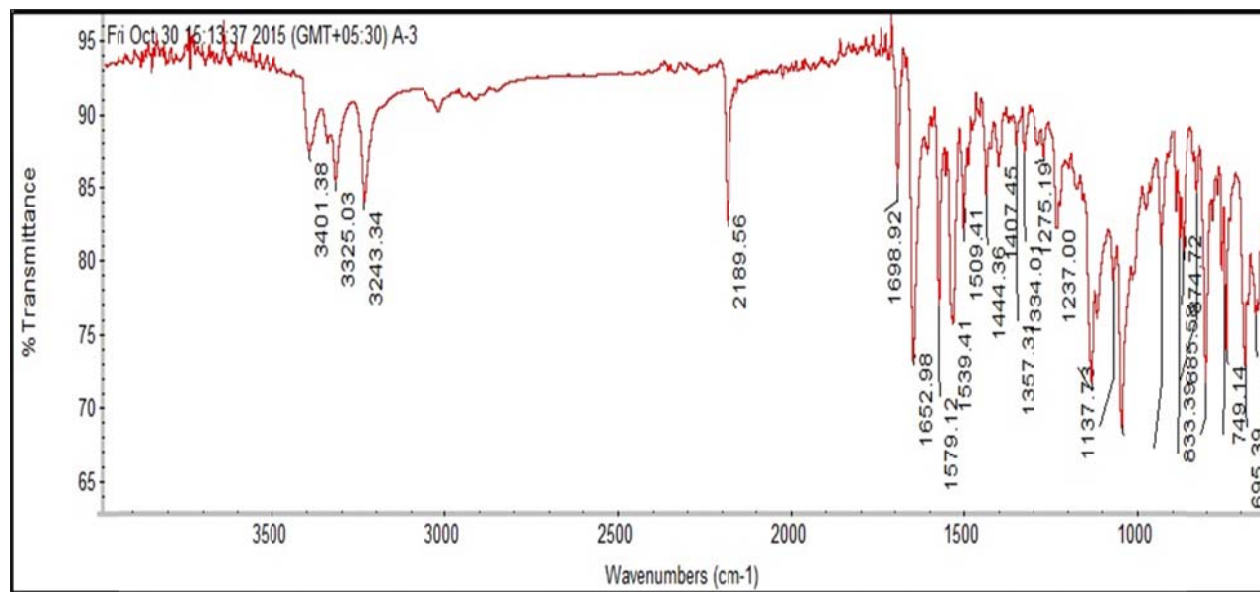

**Figure 11.** FT-IR spectrum of **1c**

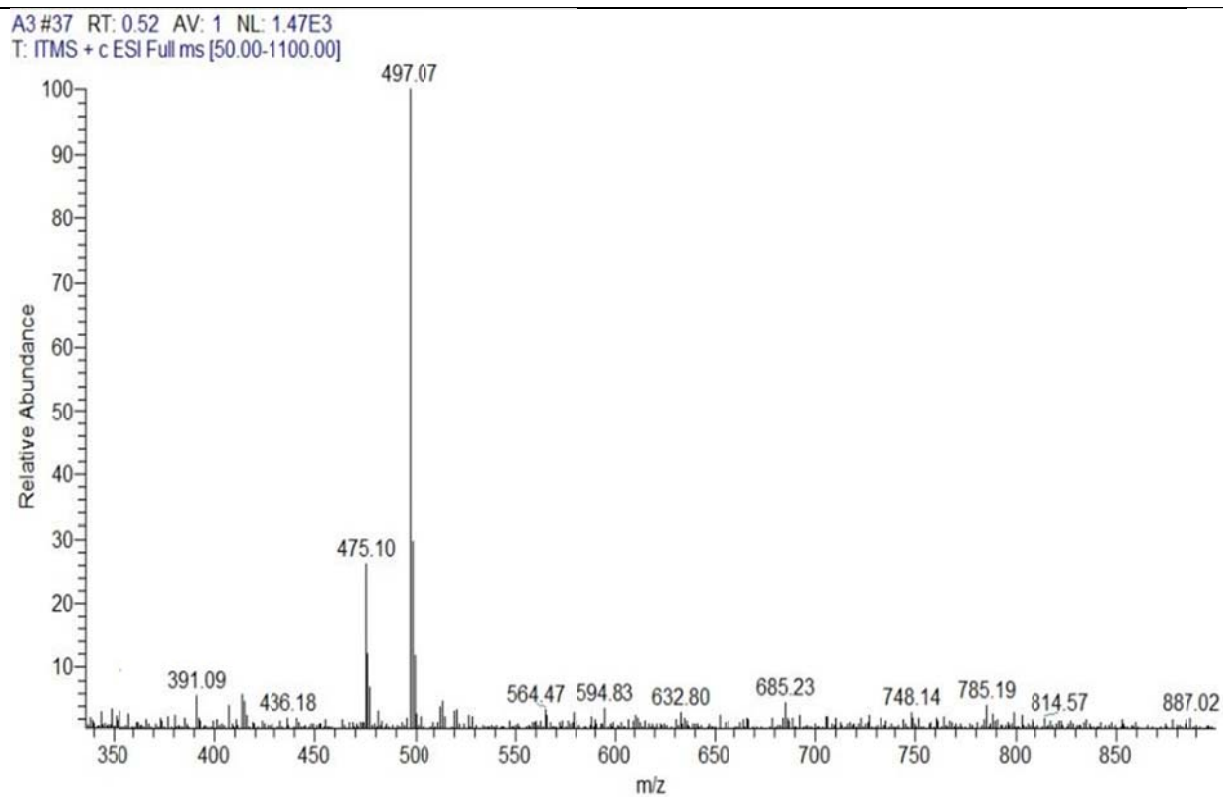

**Figure 12.** ESI-mass of **1c**

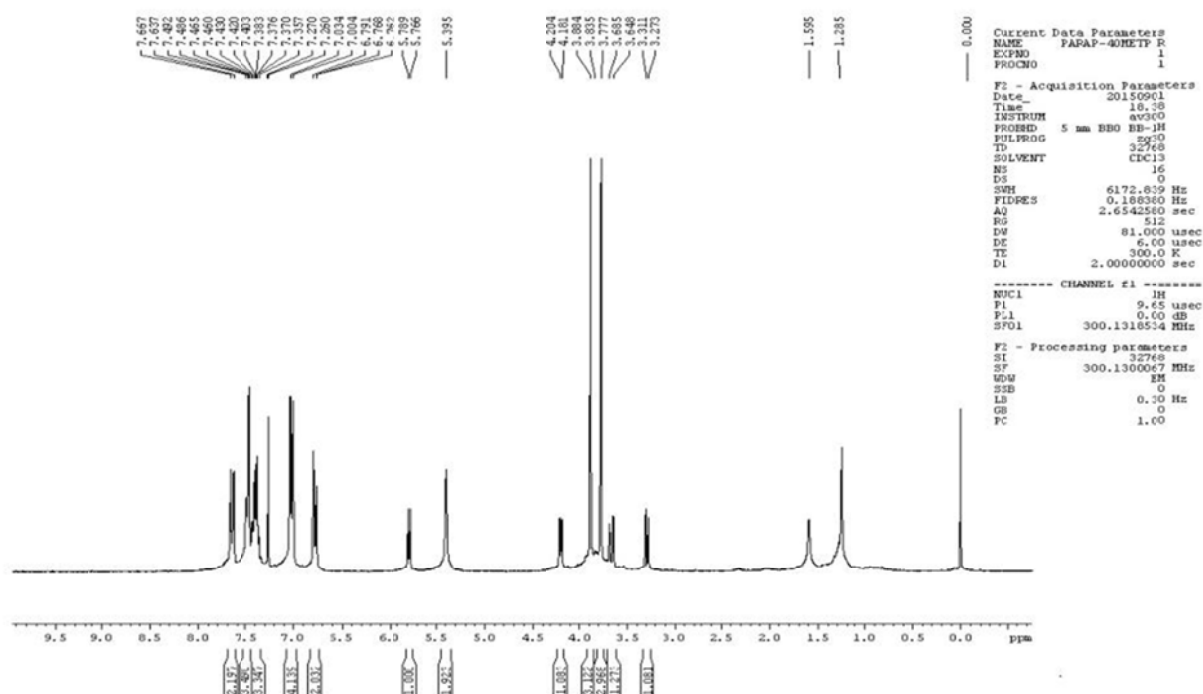

Figure 13.  $^1\text{H}$  NMR spectrum of **1d**

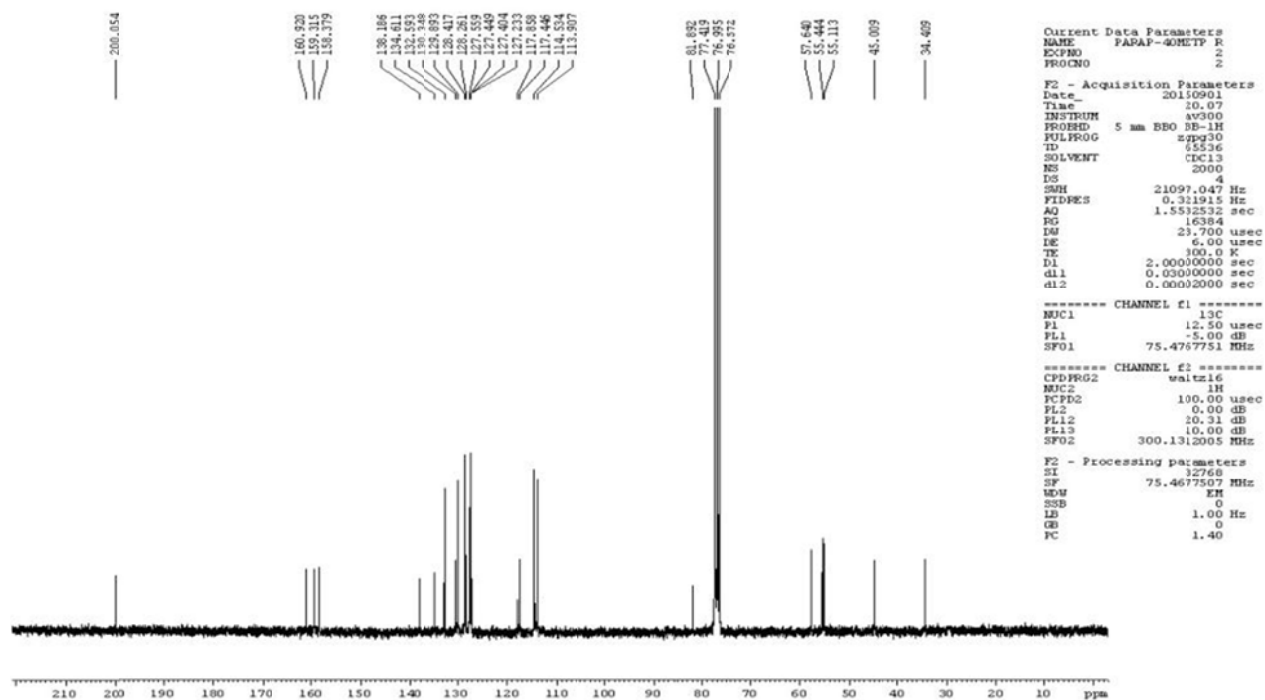

Figure 14.  $^{13}\text{C}$  NMR spectrum of **1d**

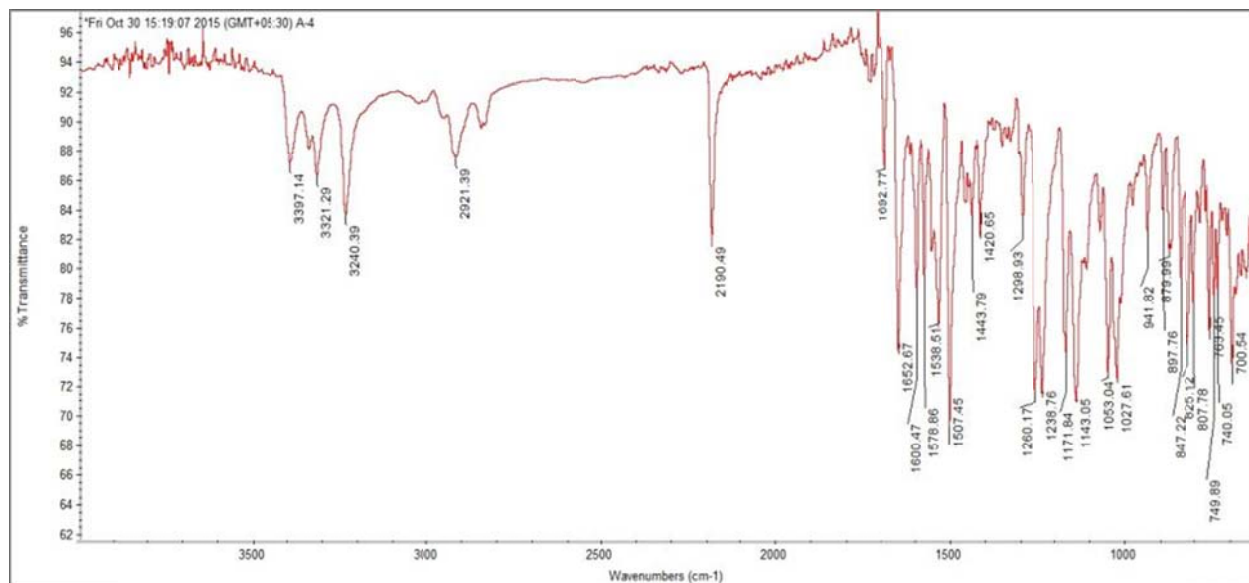

**Figure 15.** FT-IR spectrum of **1d**

A4 #24 RT: 0.34 AV: 1 NL: 8.62E2  
T: ITMS - c ESI Full ms [50.00-1100.00]

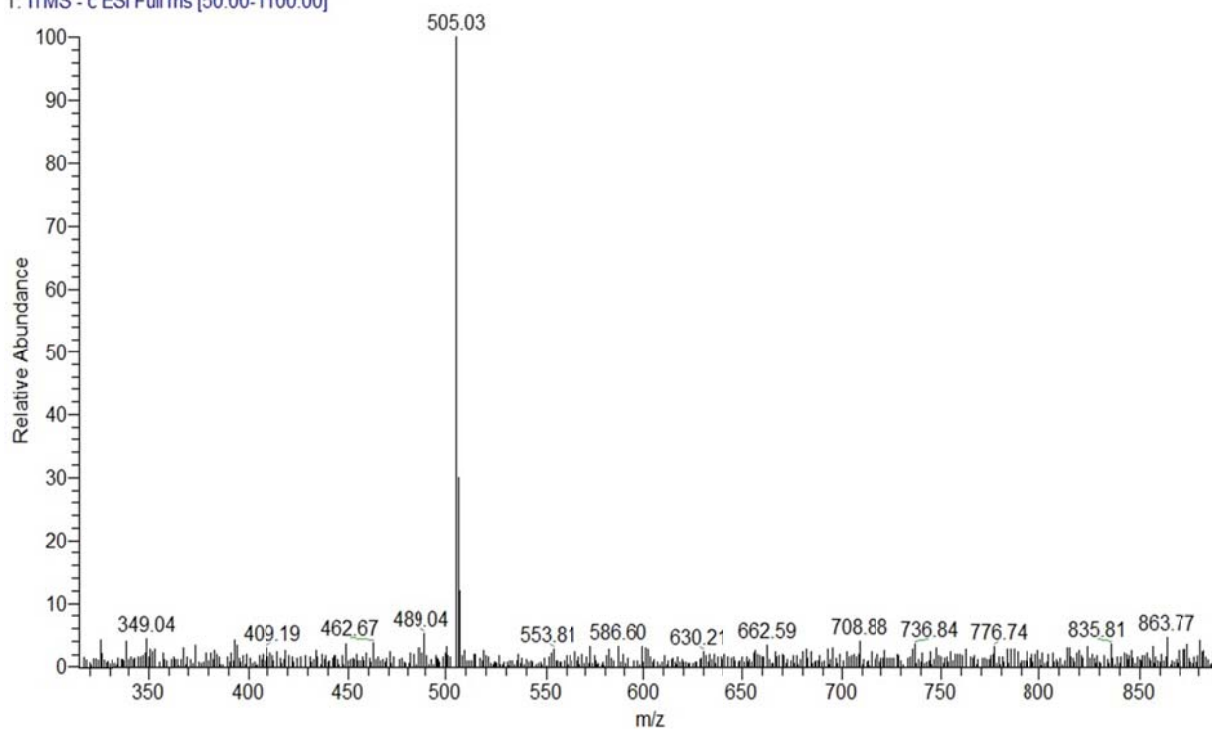

**Figure 16.** ESI-mass of **1d**

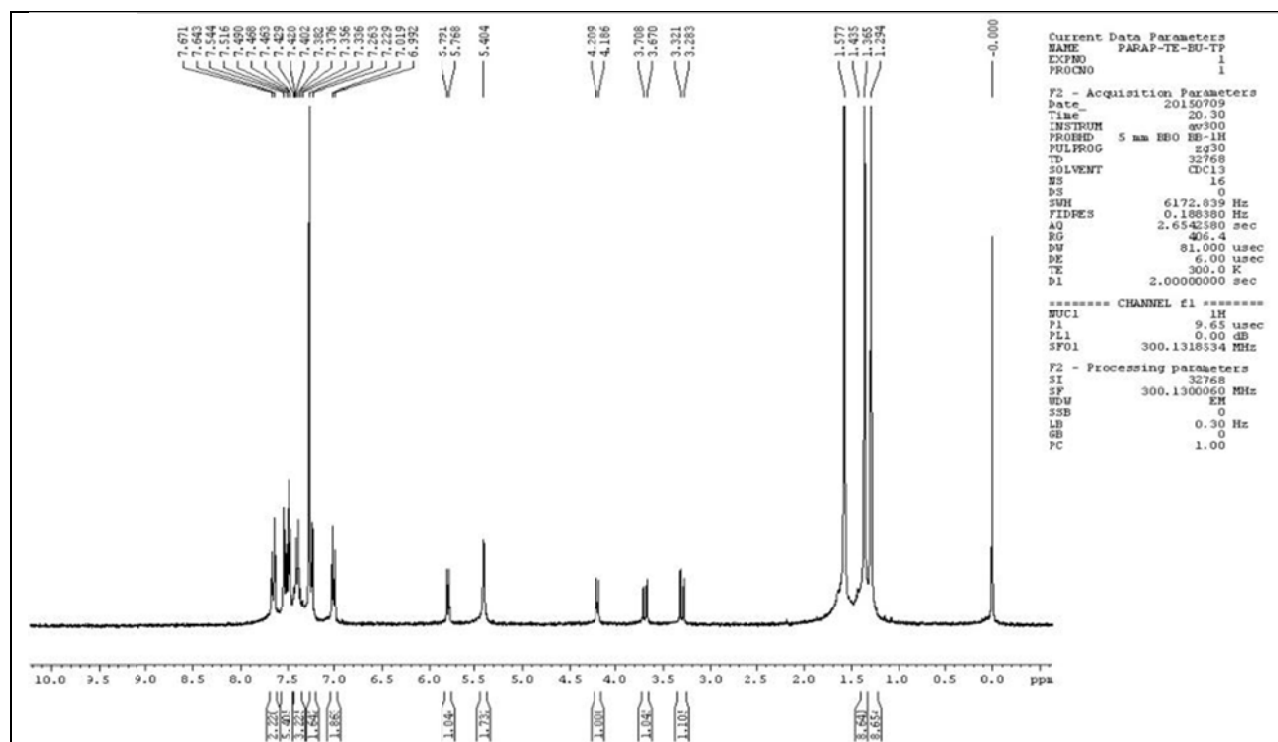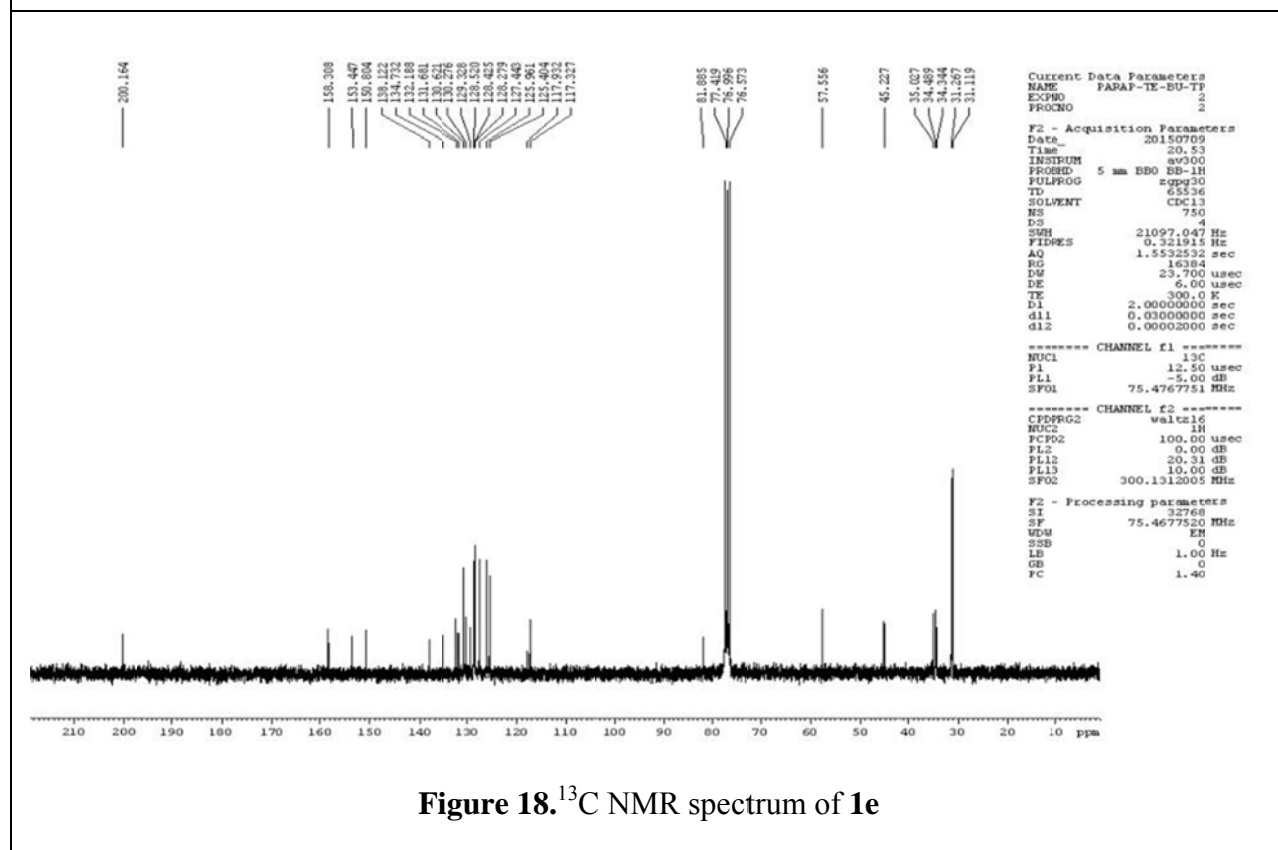

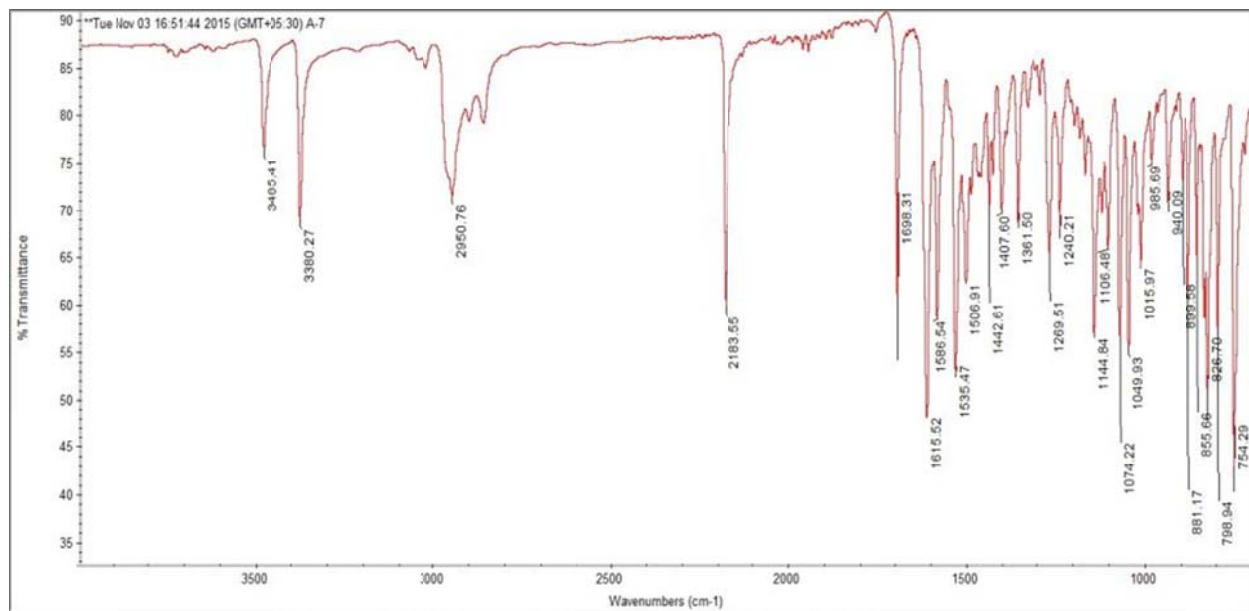

**Figure 19.** FT-IR spectrum of **1e**

A7 #139 RT: 1.97 AV: 1 NL: 1.16E3  
T: ITMS + c ESI Full ms [50.00-1100.00]

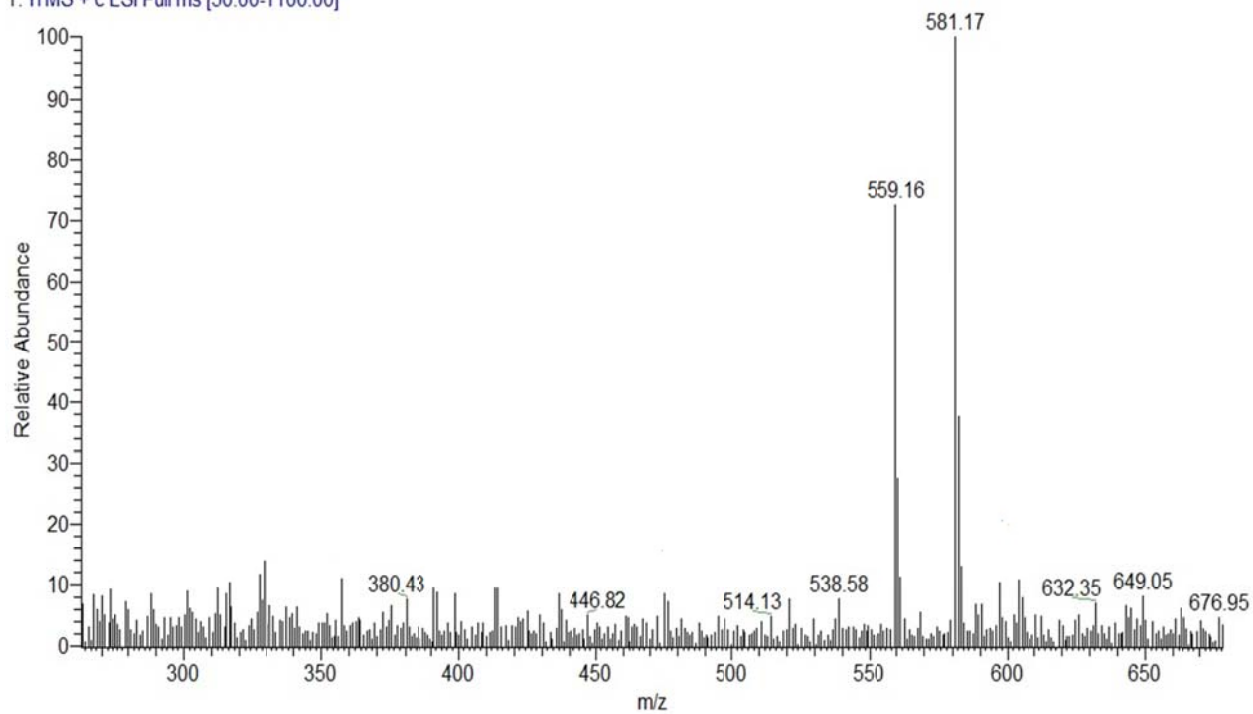

**Figure 20.** ESI-mass of **1e**

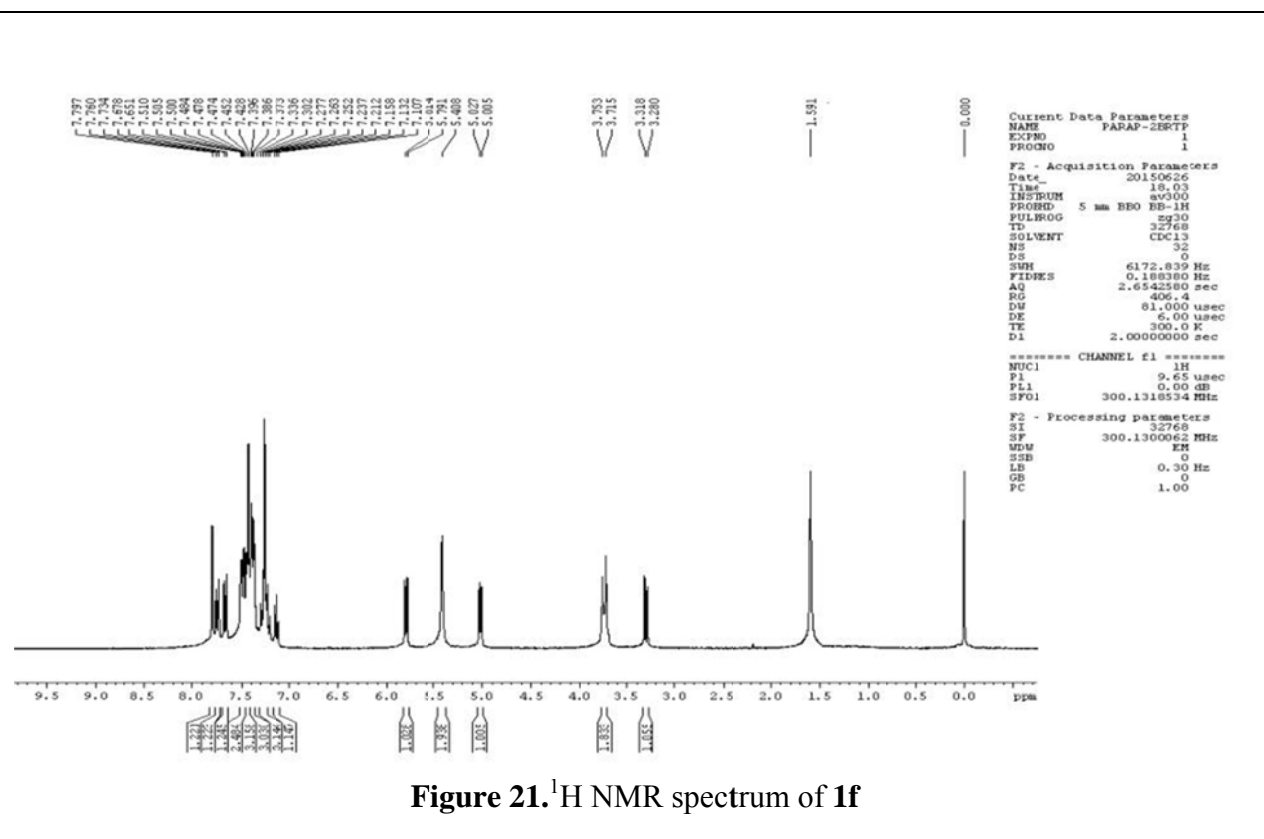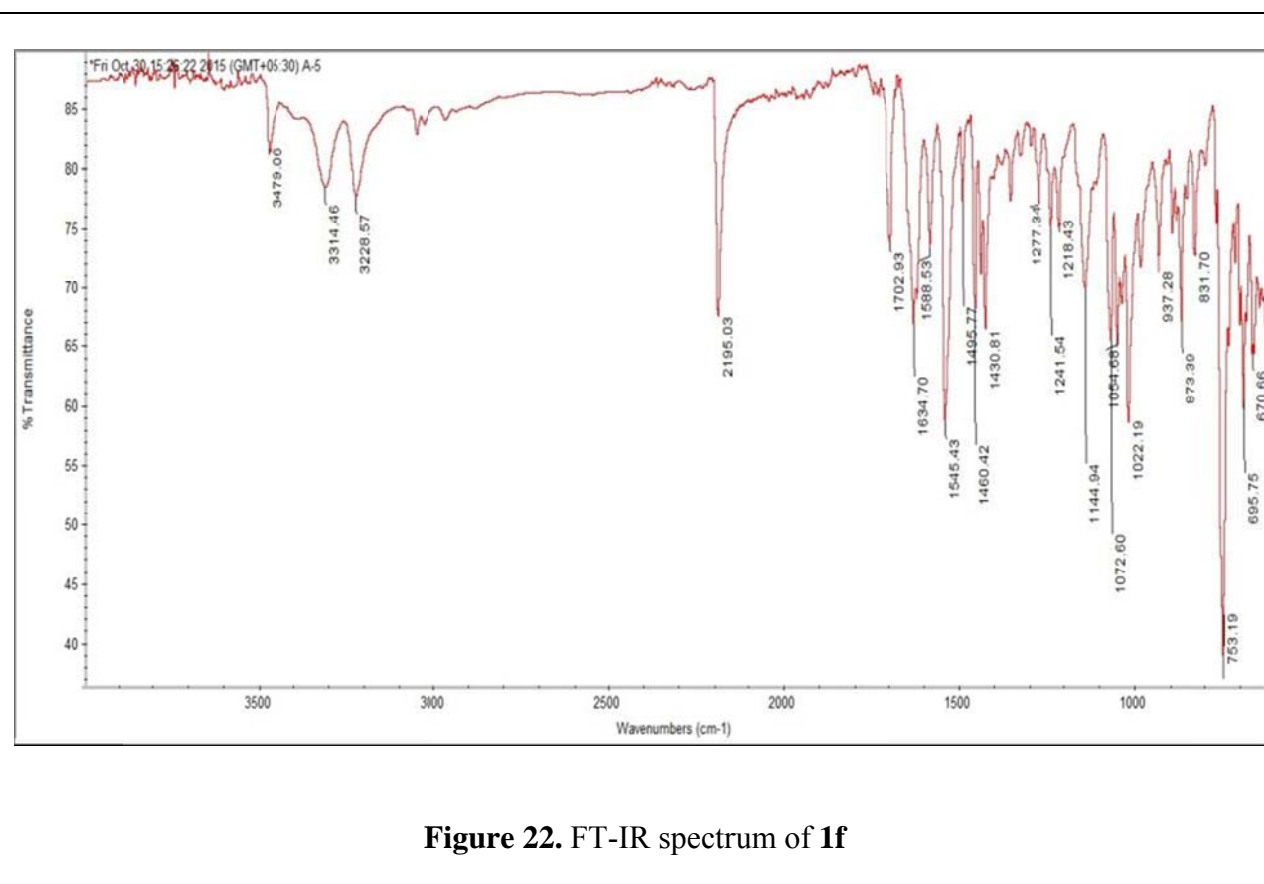

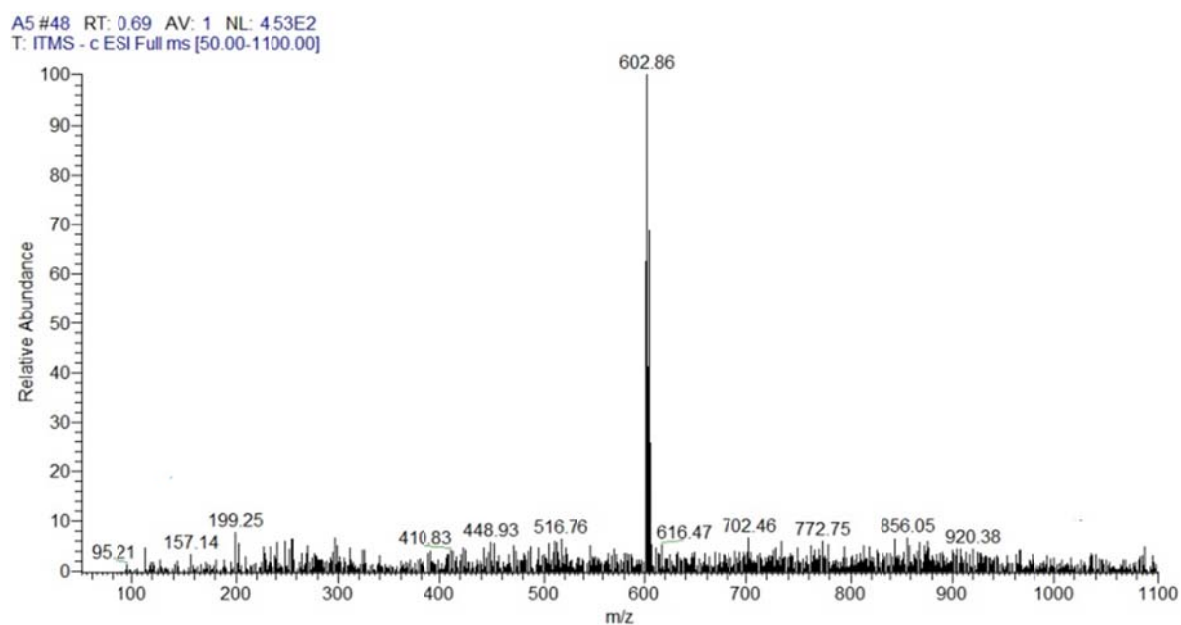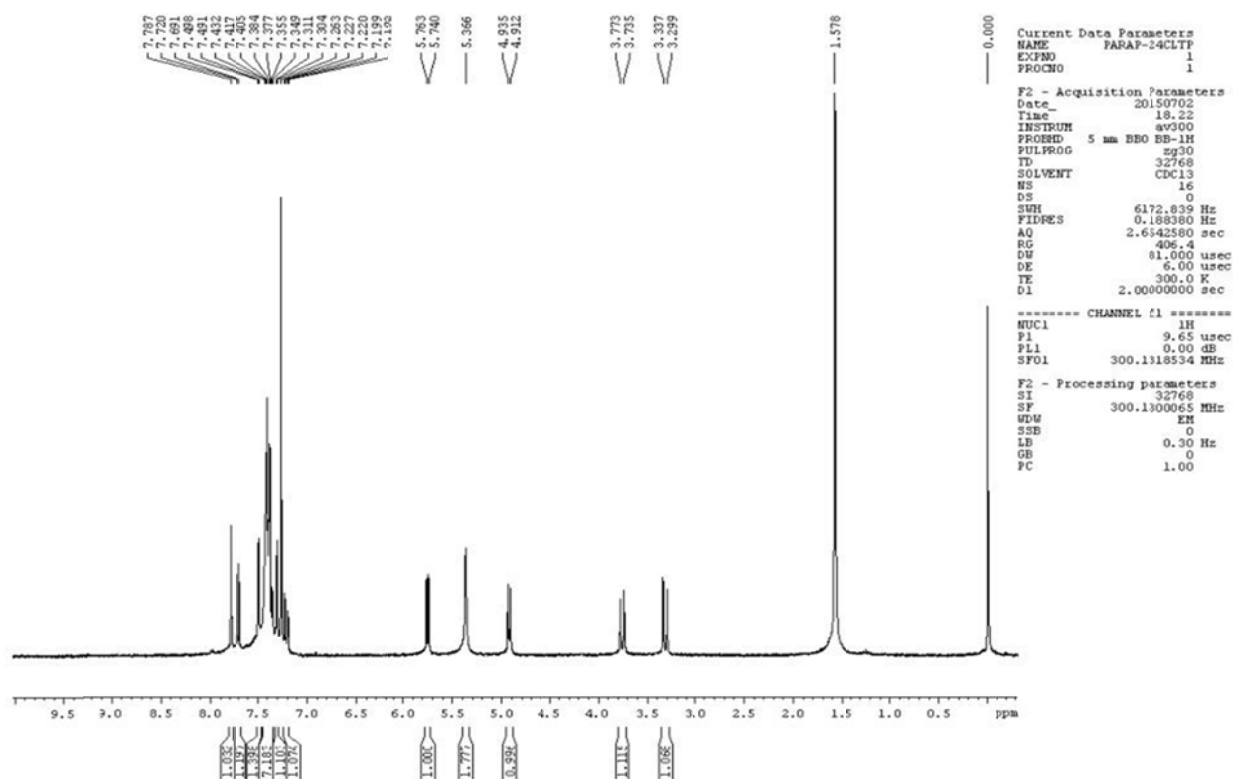





A6 #94 RT: 1.34 AV: 1 NL: 6.67E2  
T: ITMS - c ESI Full ms [50.00-1100.00]

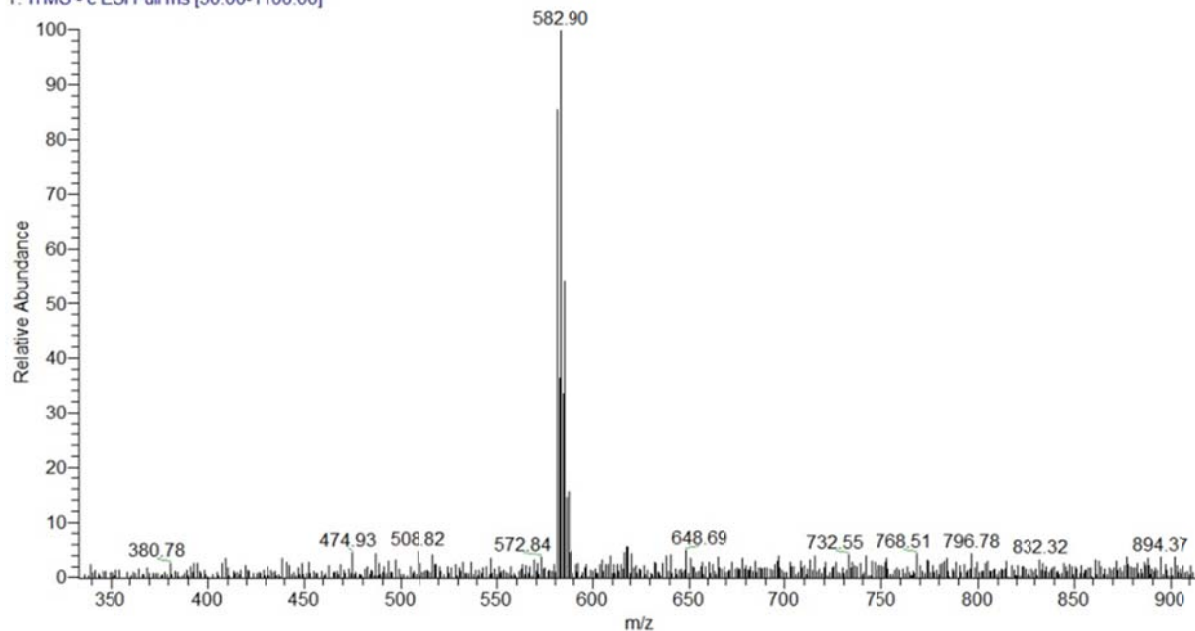

Figure 27. ESI-mass of **1g**

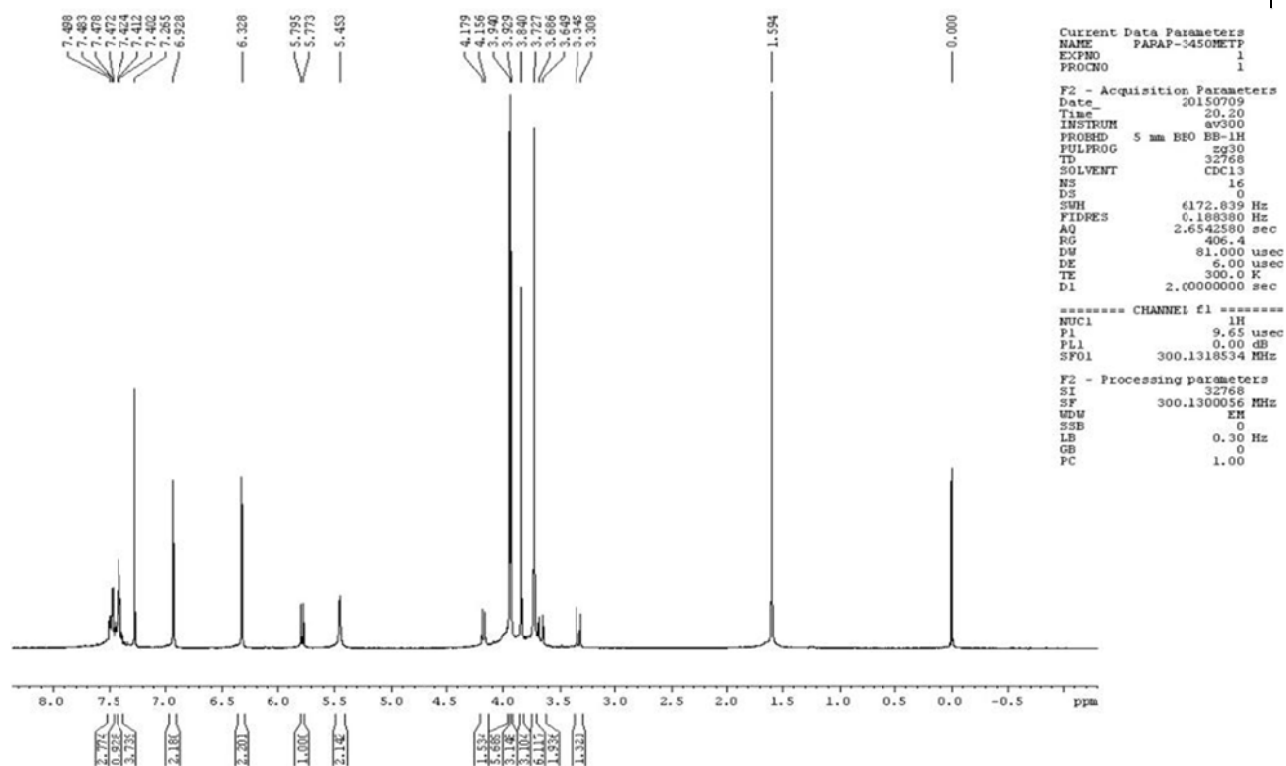

Figure 28. <sup>1</sup>H NMR spectrum of **1h**

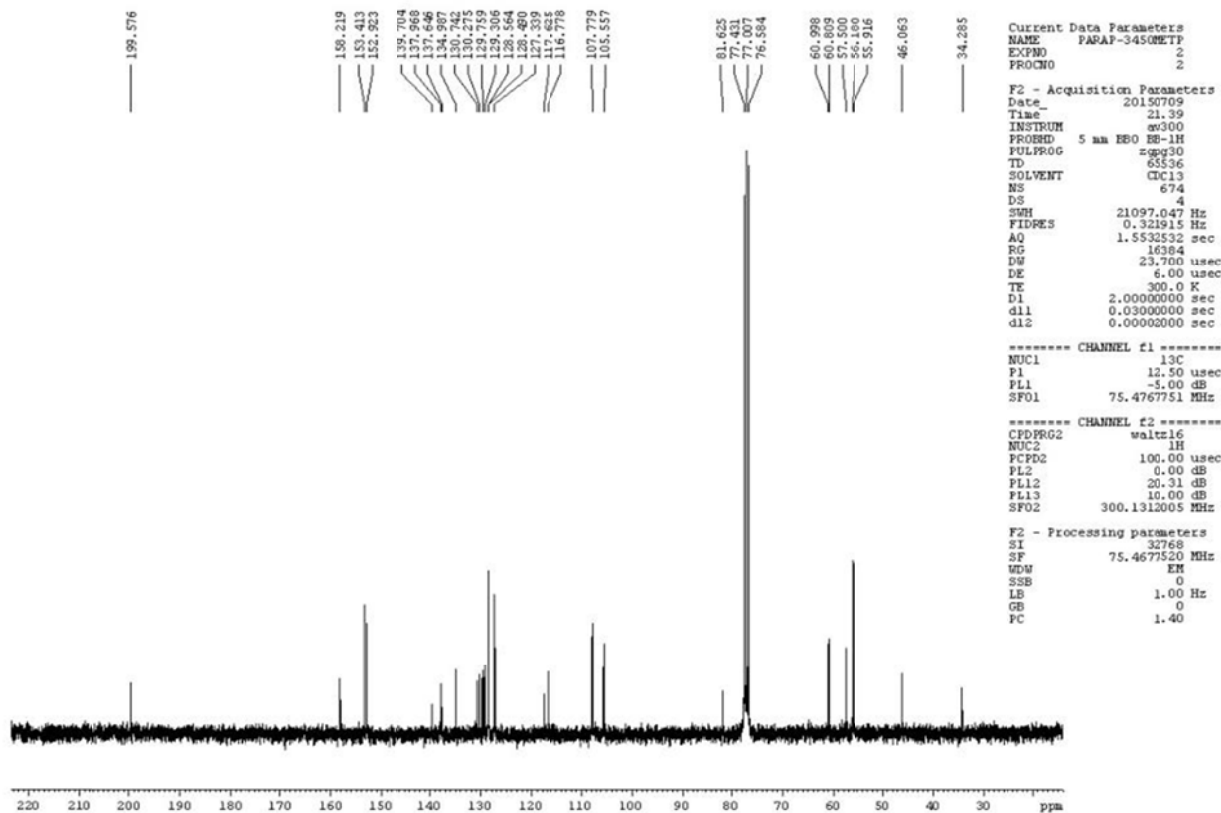

**Figure 29.**  $^{13}\text{C}$  NMR spectrum of **1h**

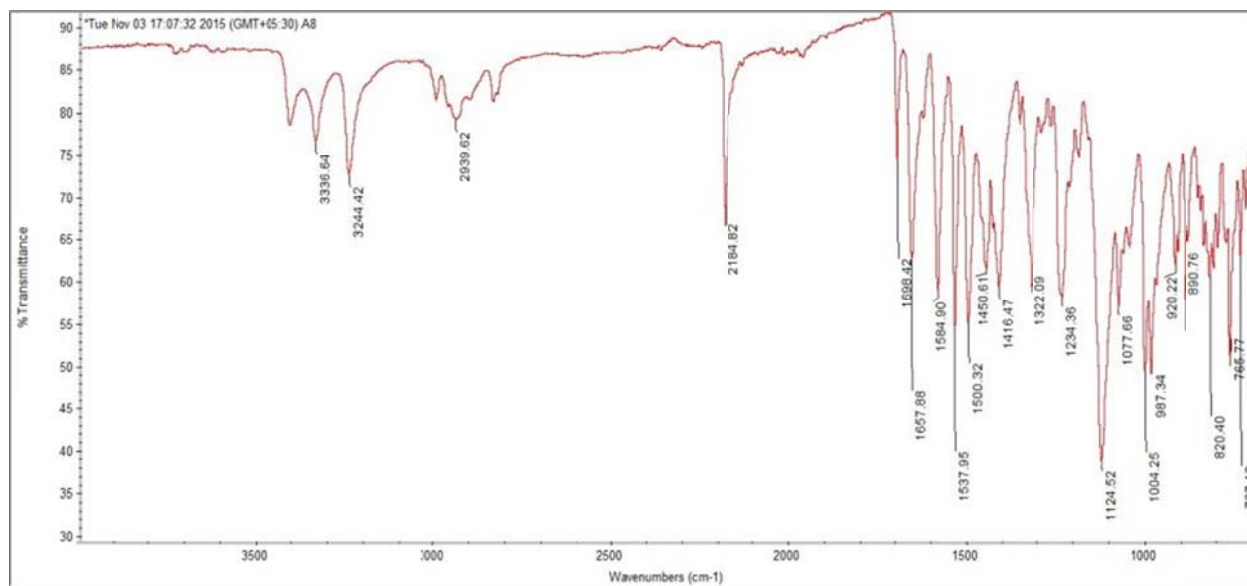

**Figure 30.** FT-IR spectrum of **1h**



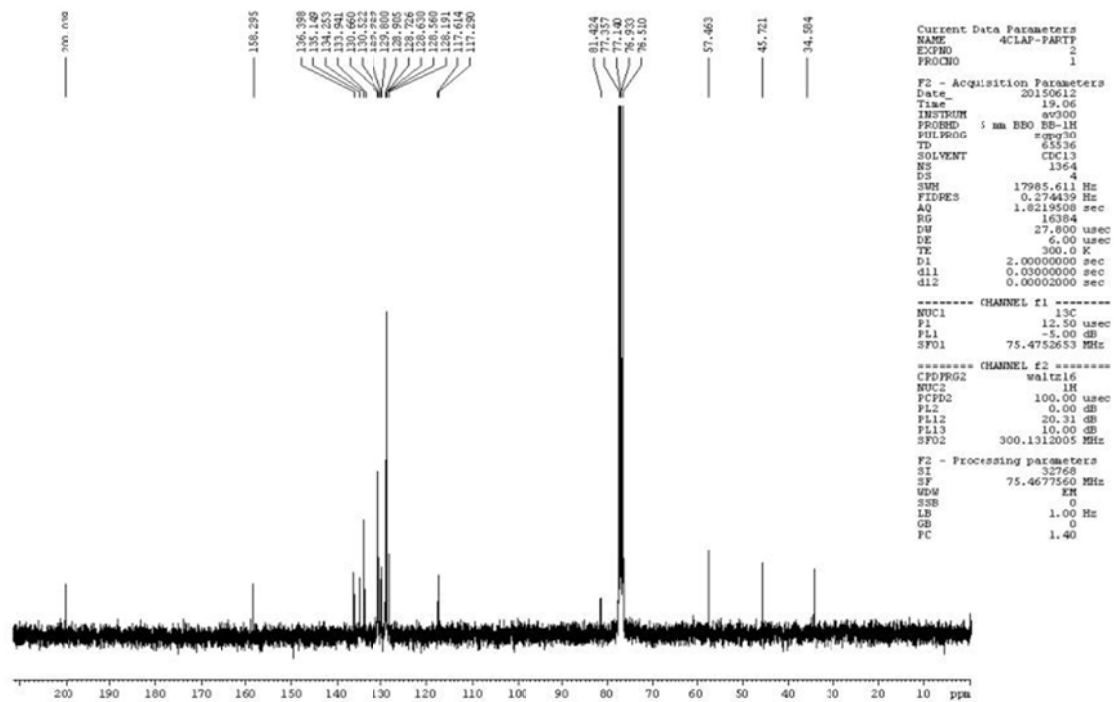

Figure 33.  $^{13}\text{C}$ NMR spectrum of **1i**

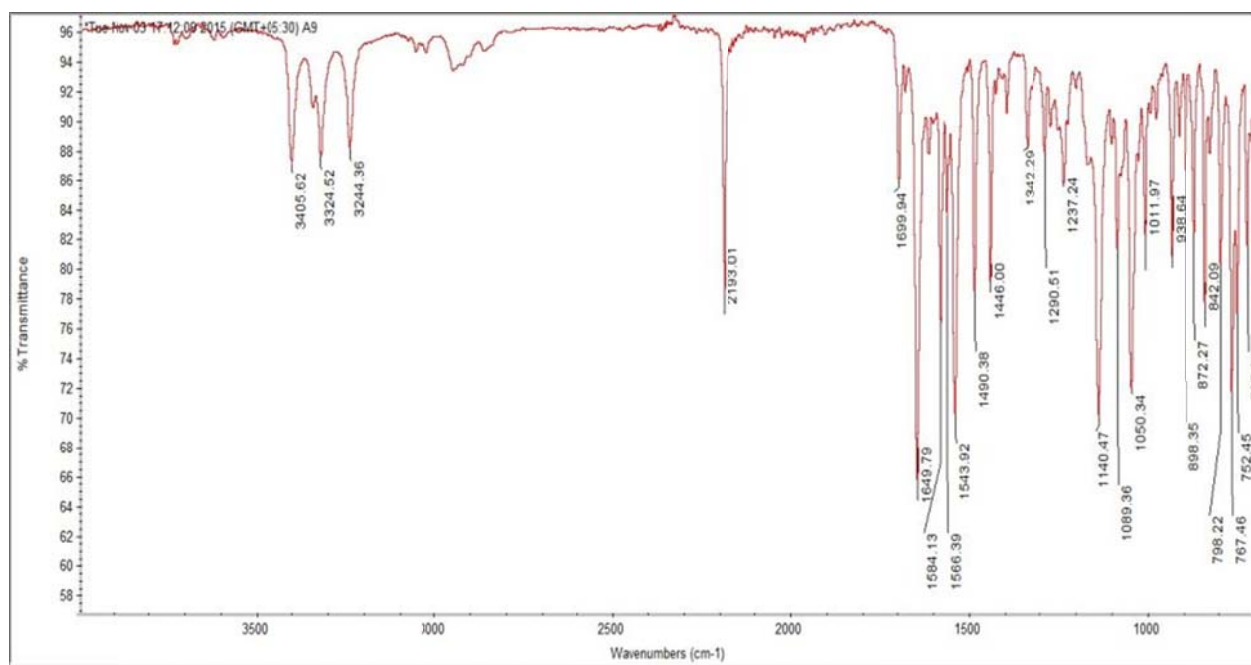

Figure 34. FT-IR spectrum of **1i**

A9 #32 RT: 0.45 AV: 1 NL: 6.51E2  
T: ITMS - c ESI Full ms [50.00-1100.00]

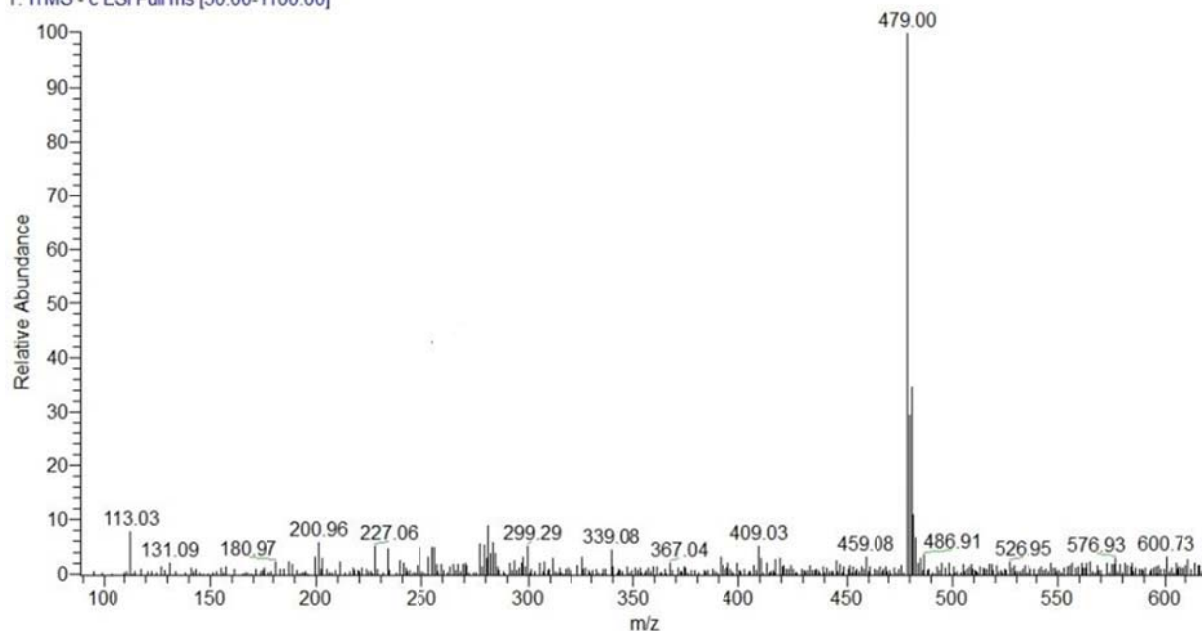

Figure 35. ESI-mass of **1i**

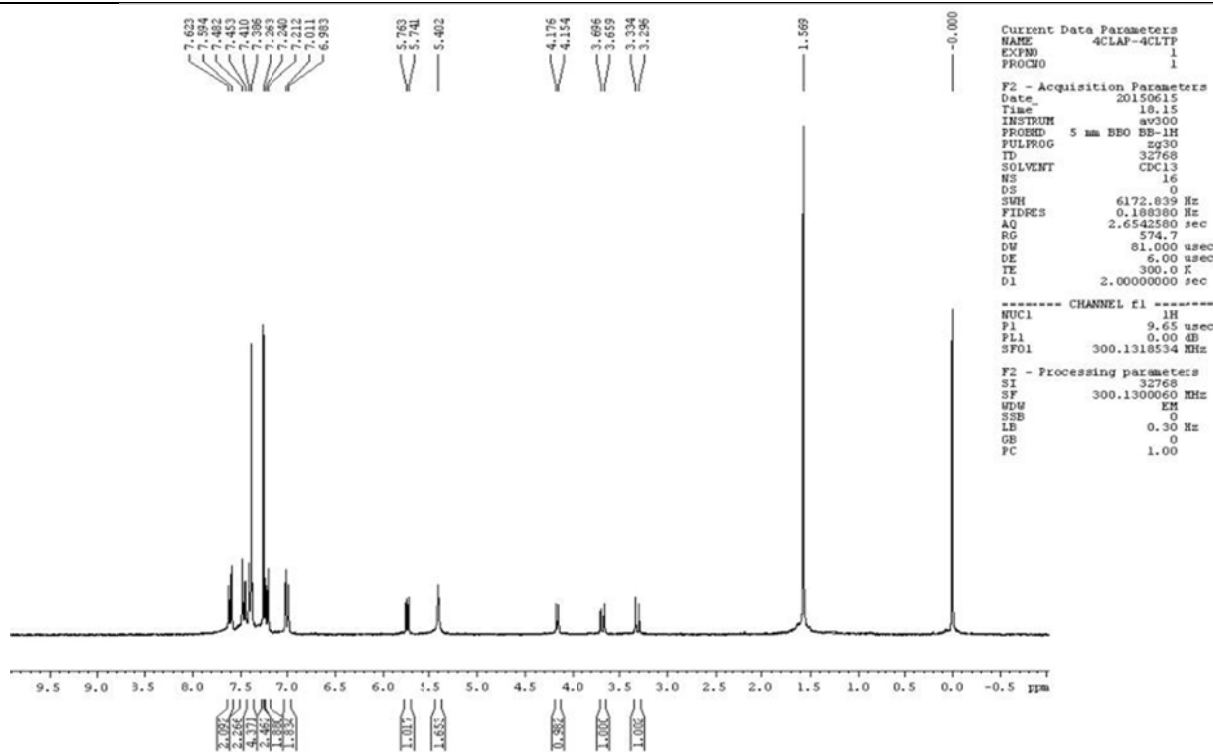

Figure 36.  $^1\text{H}$  NMR spectrum of **1j**

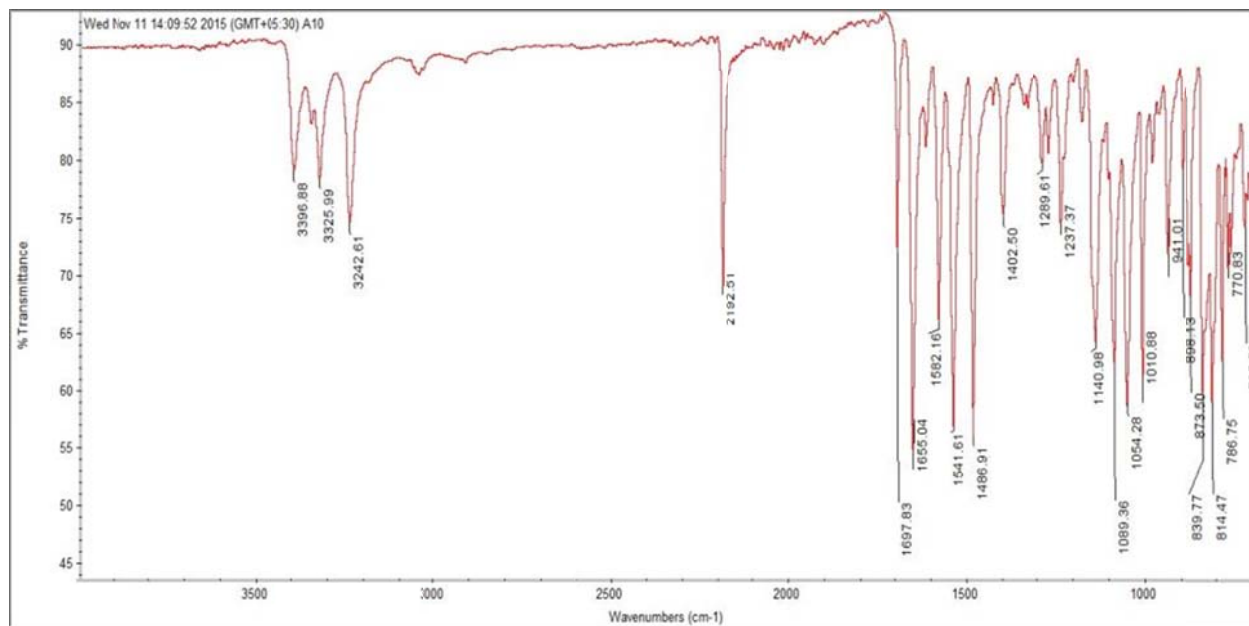

**Figure 37.** FT-IR spectrum of **1j**

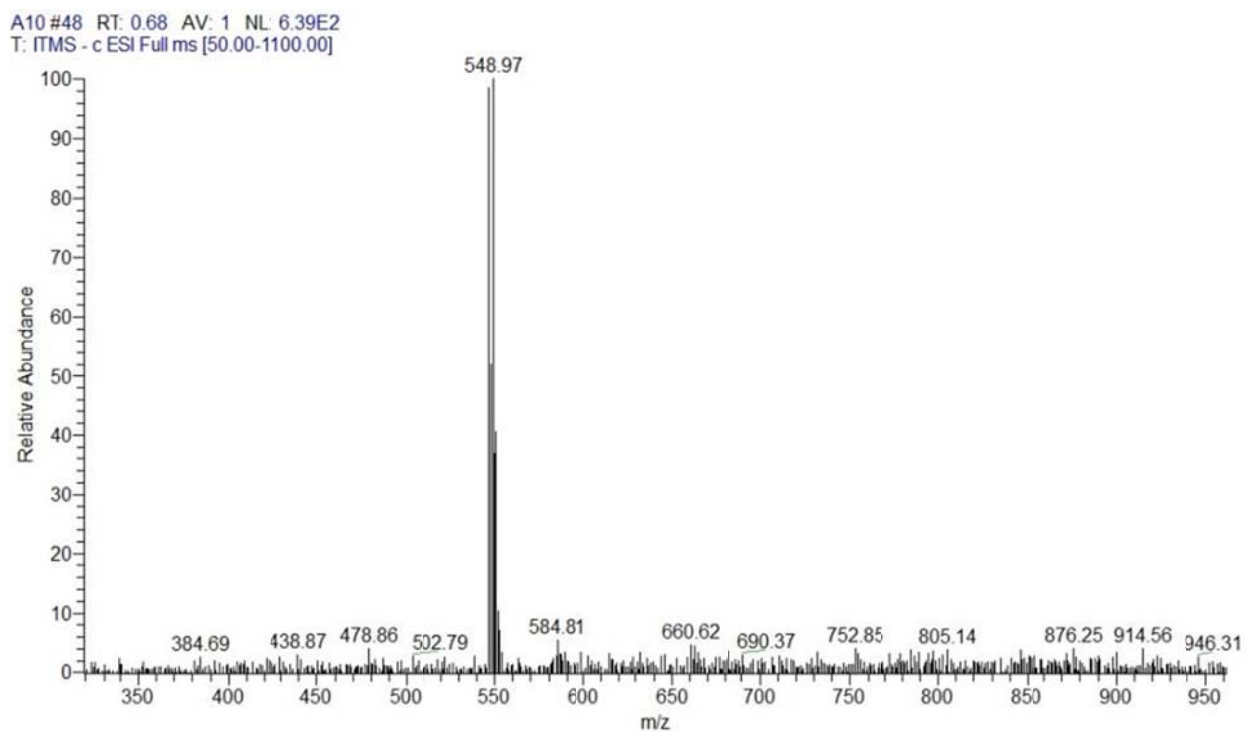

**Figure 38.** ESI-mass of **1j**

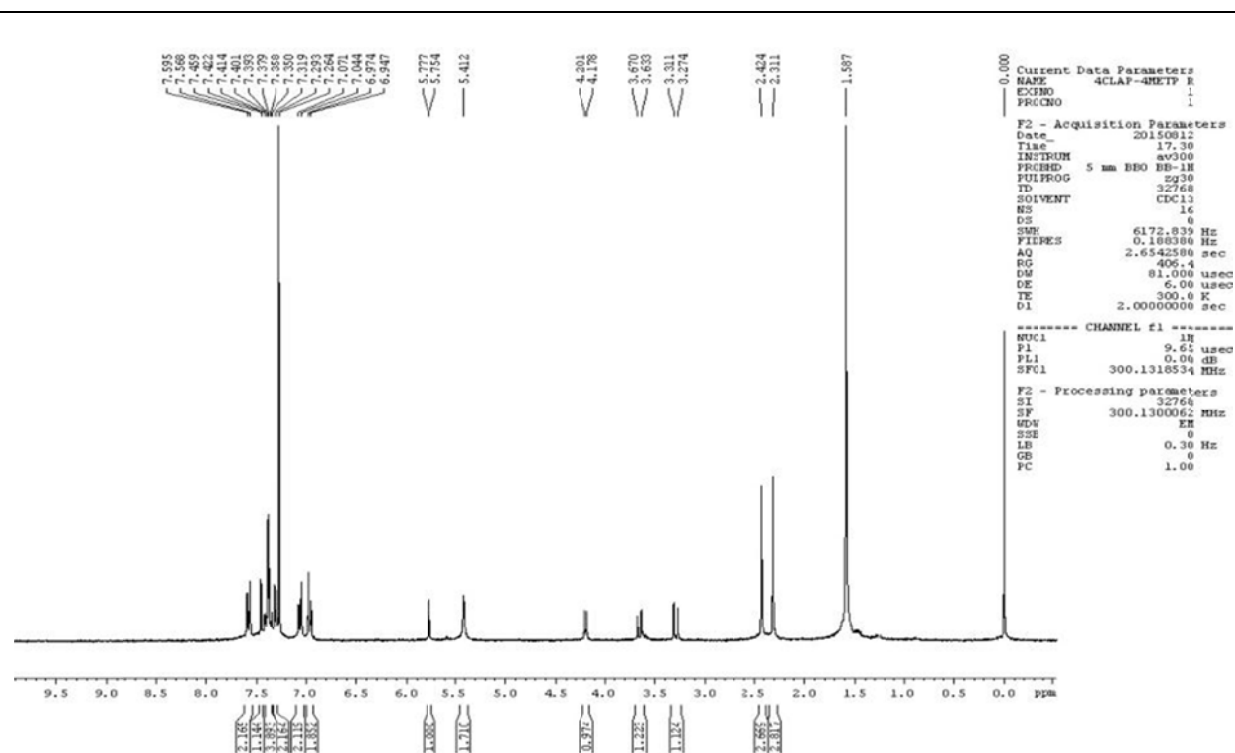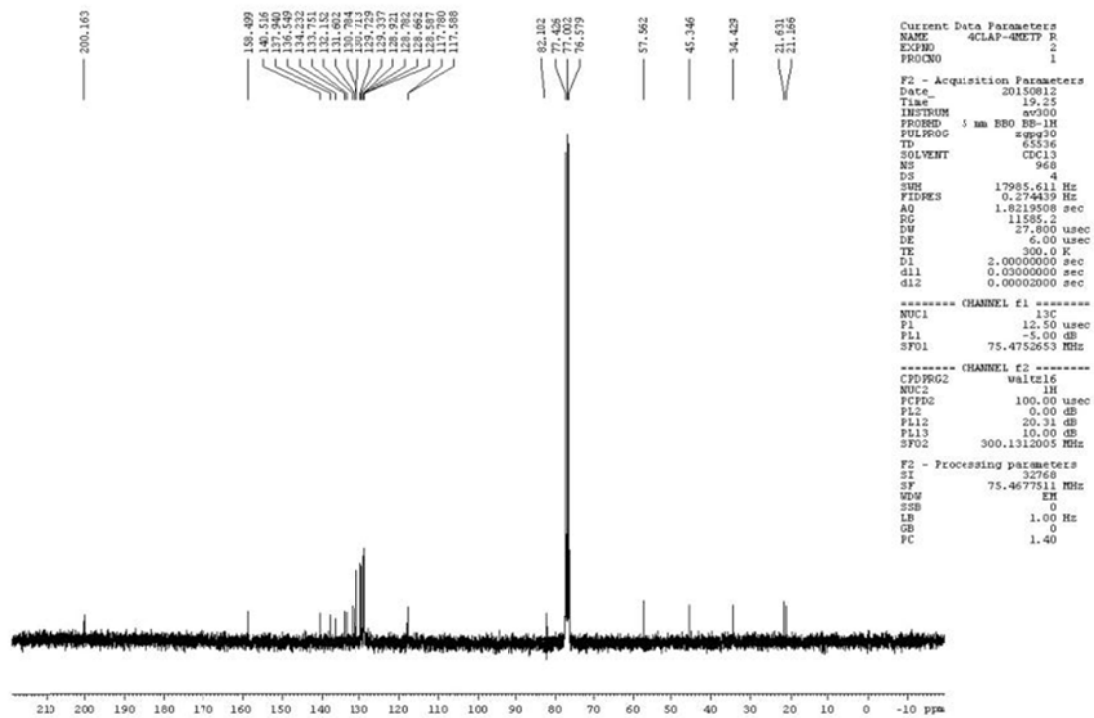

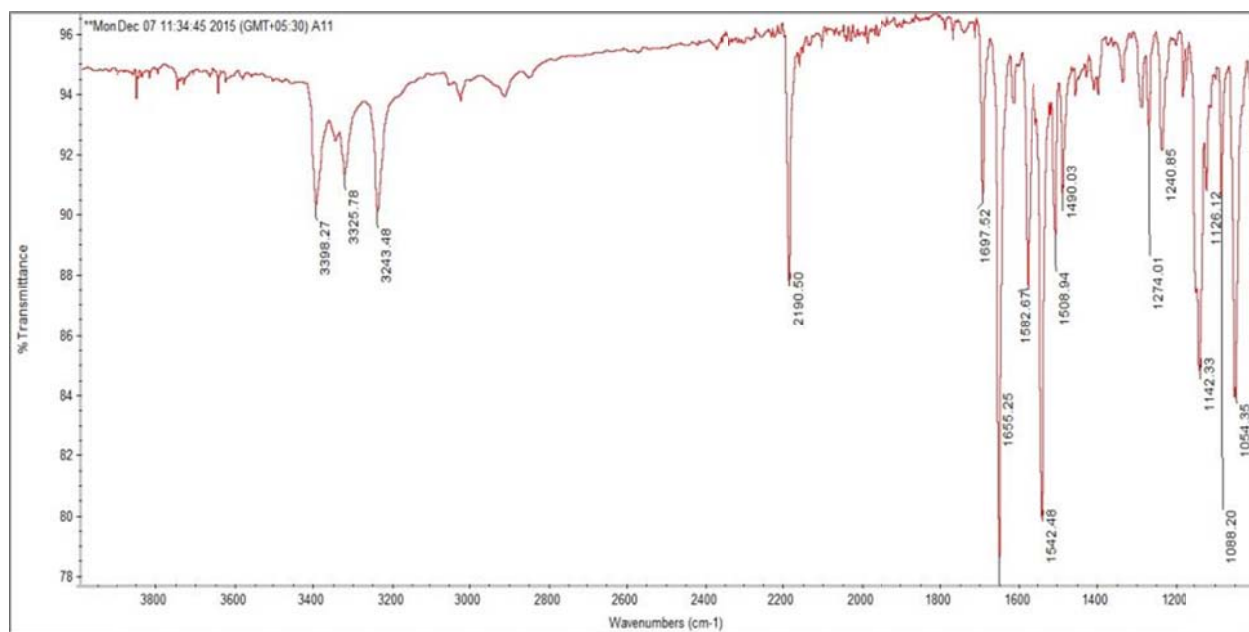

**Figure 41.** FT-IR spectrum of **1k**

A11 #84 RT: 1.21 AV: 1 NL 2.35E2  
T: ITMS - c ESI Full ms [50.00-1100.00]

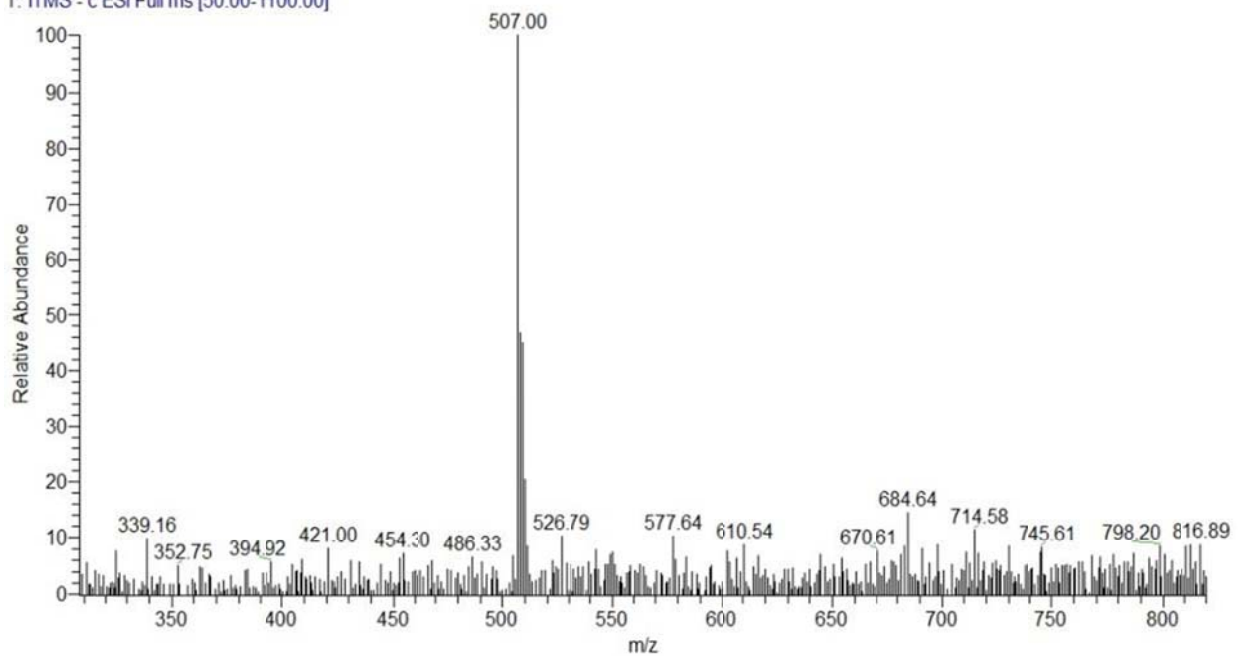

**Figure 42.** ESI-mass of **1k**



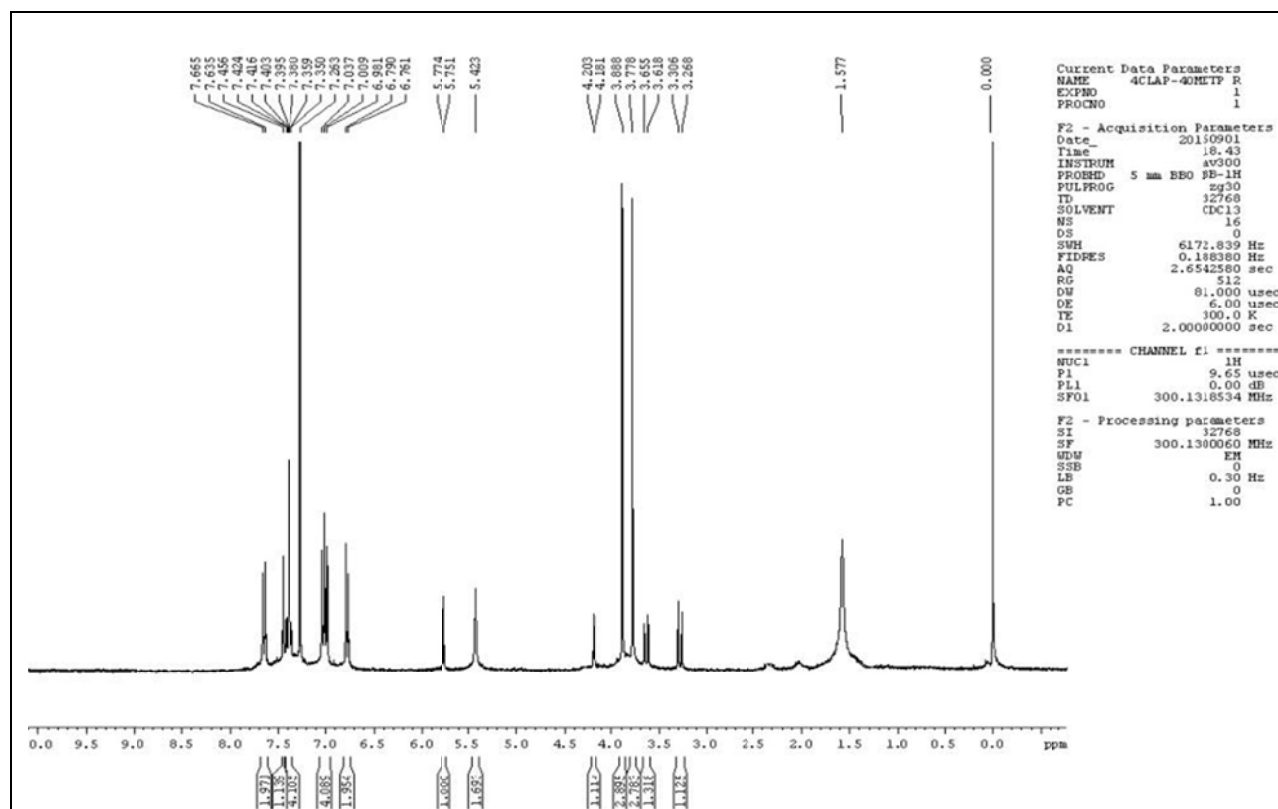

Figure 43.  $^1\text{H}$  NMR spectrum of **11**

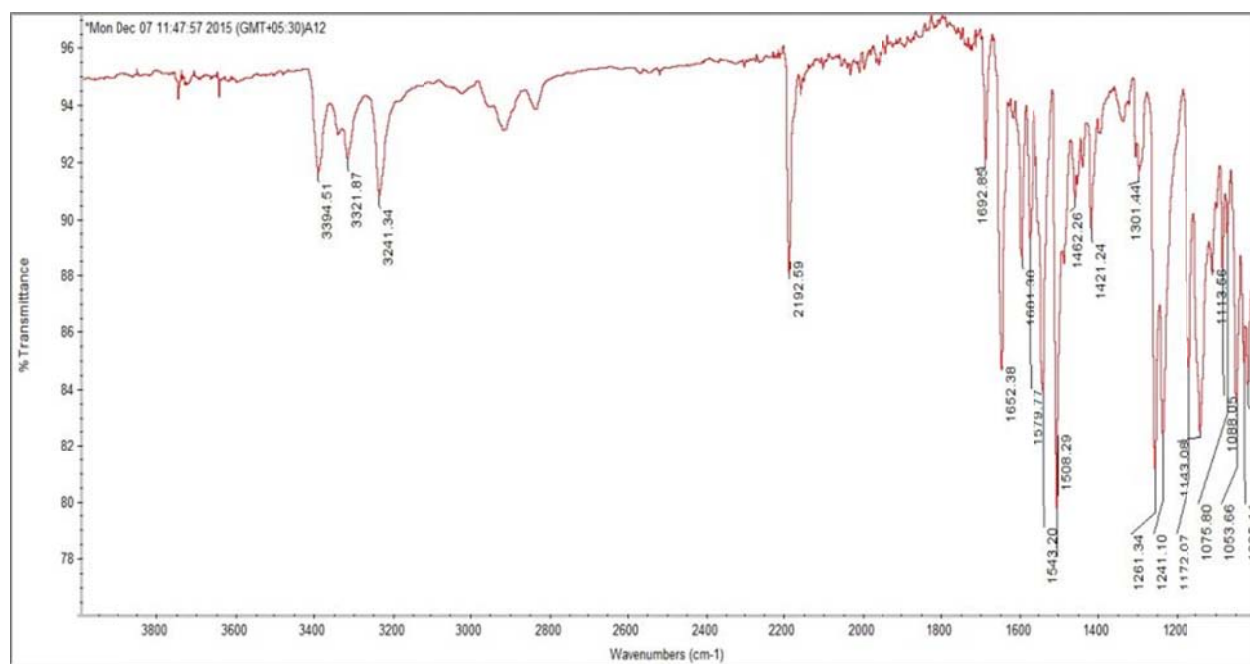

Figure 44. FT-IR spectrum of **11**

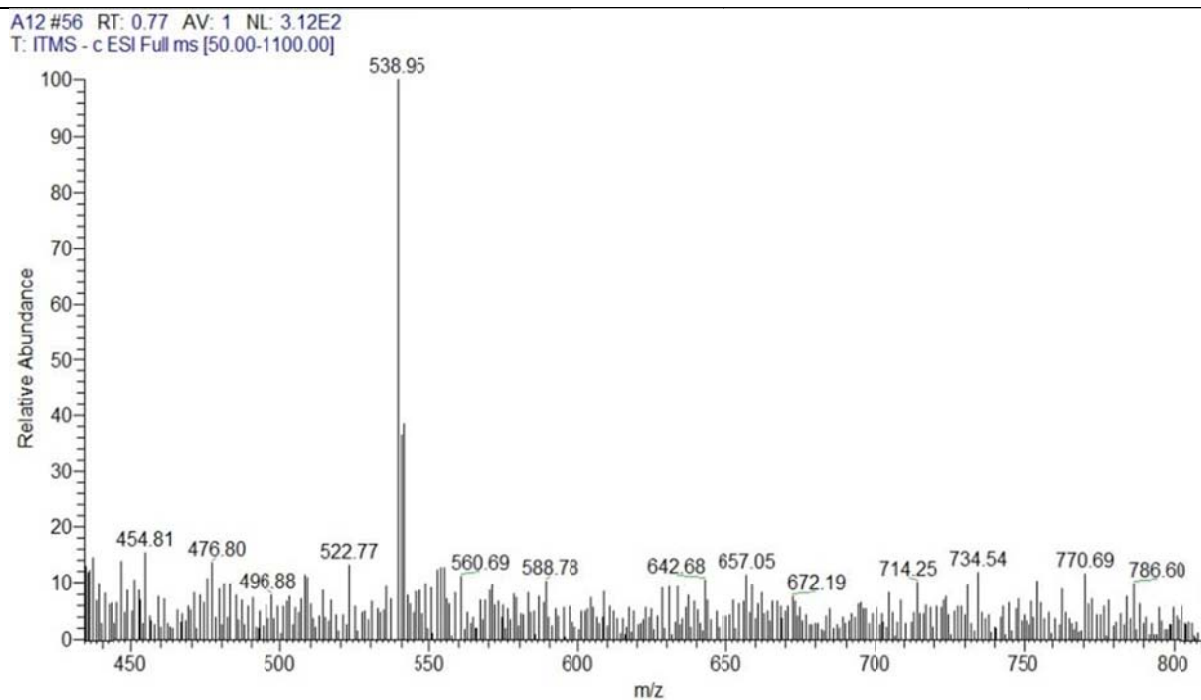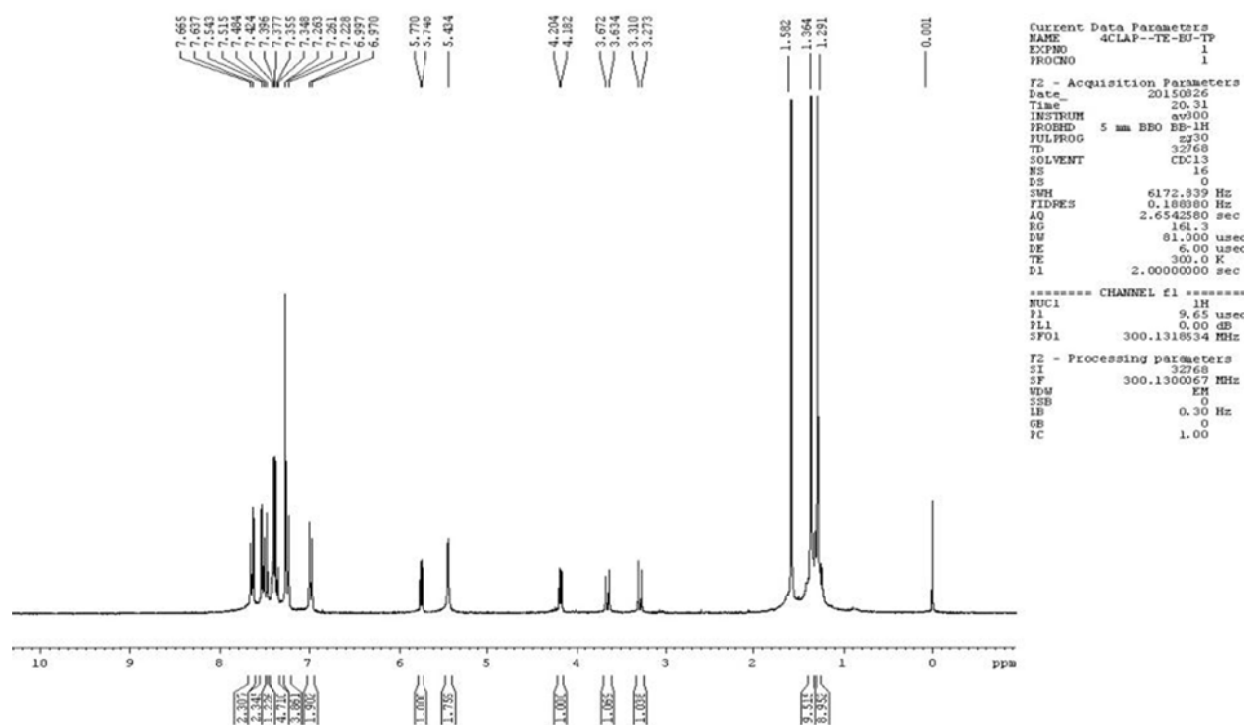

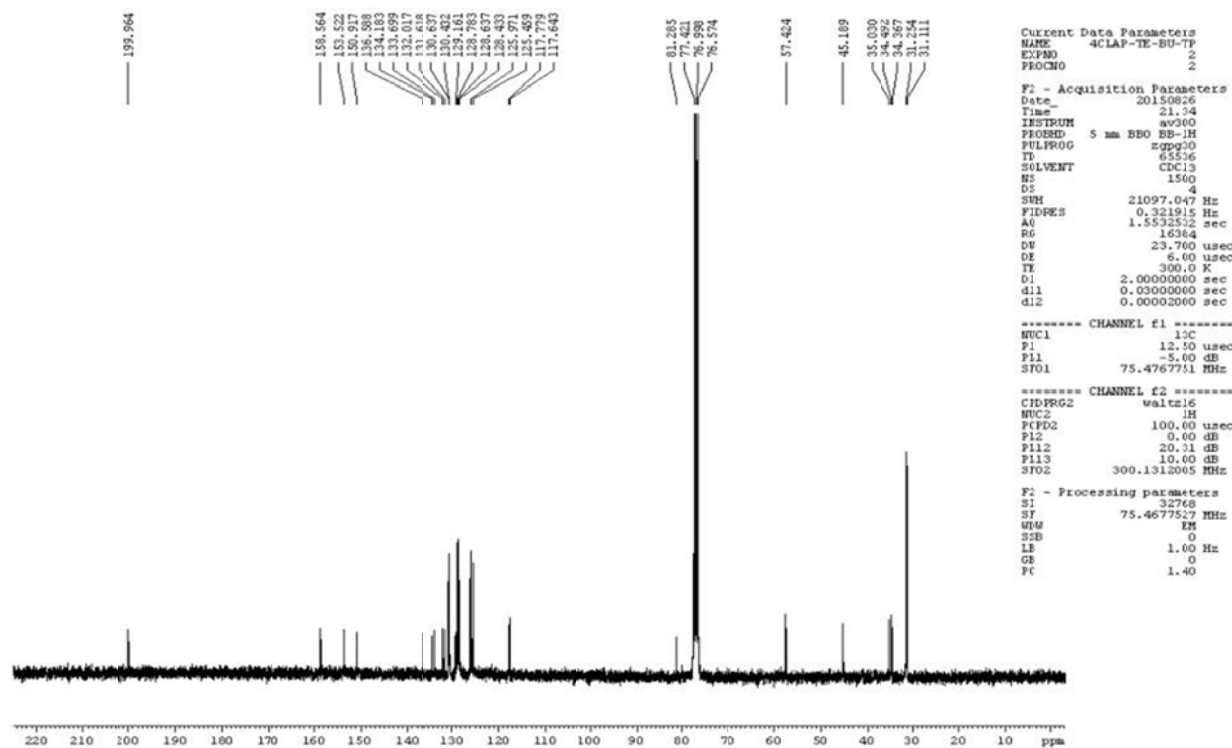

Figure 47.  $^{13}\text{C}$  NMR spectrum of **1m**

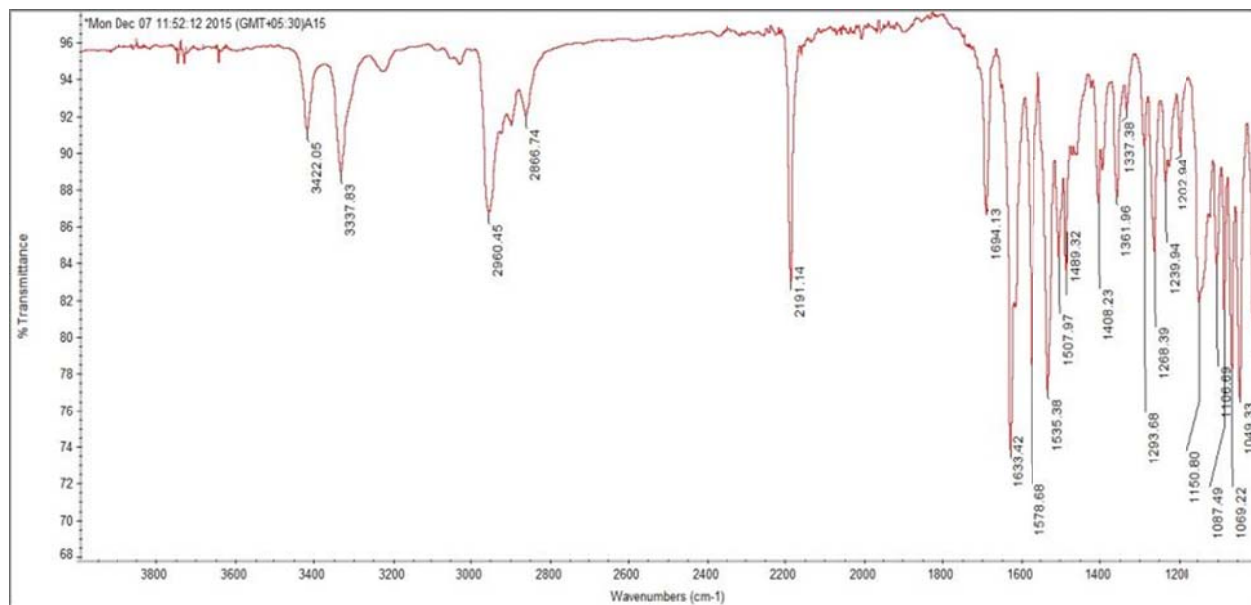

Figure 48. FT-IR spectrum of **1m**

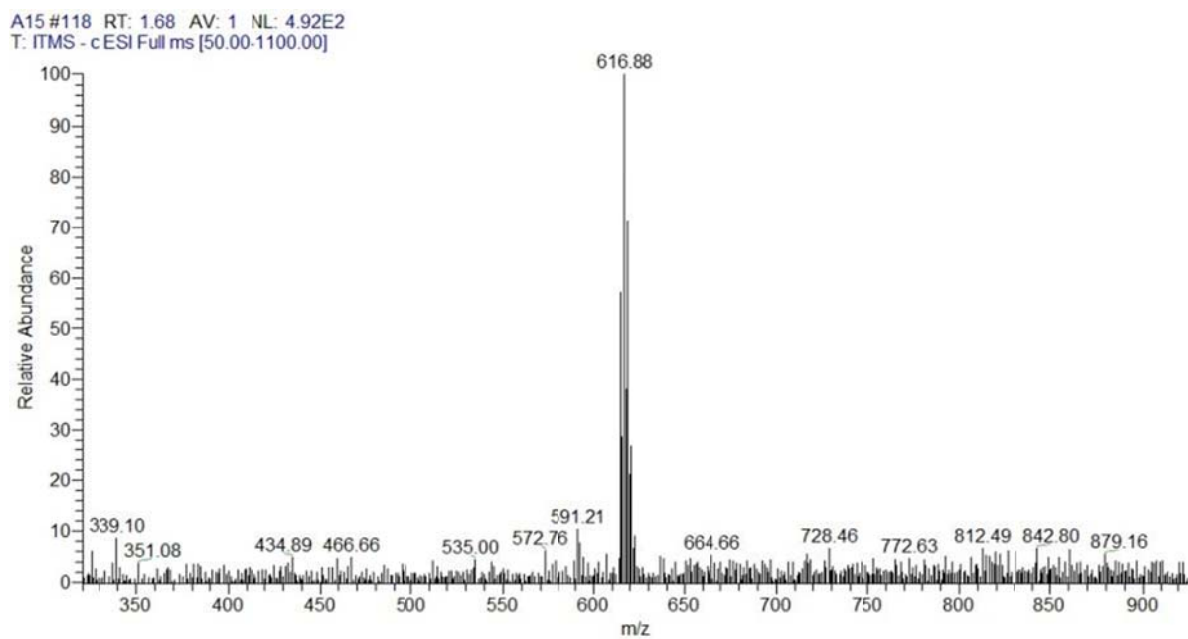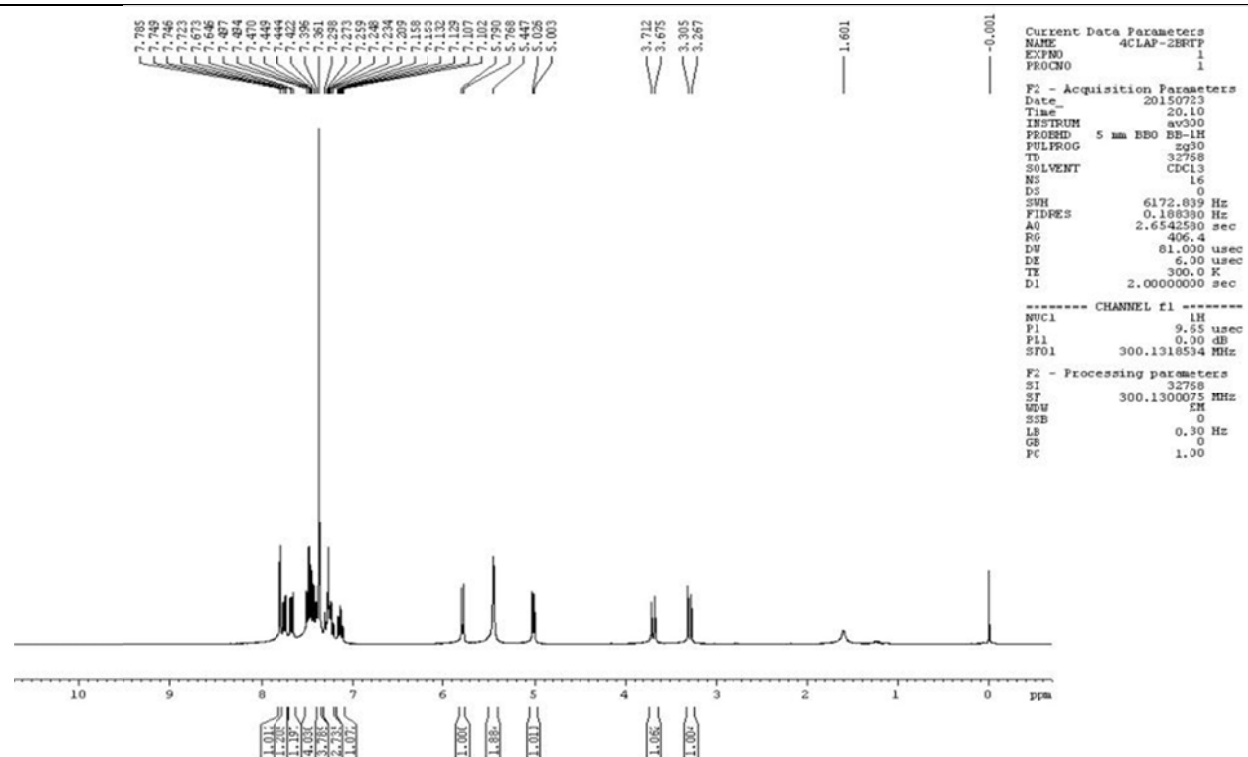

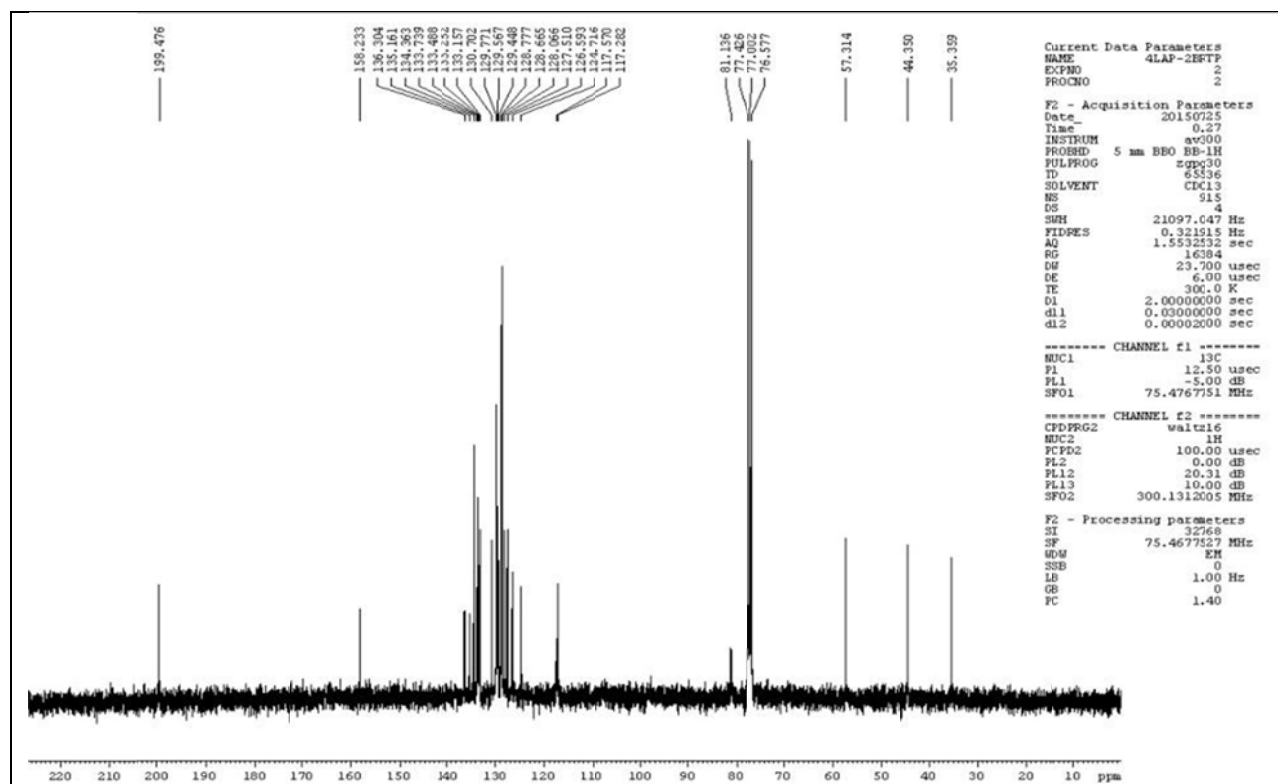

Figure 51.  $^{13}\text{C}$ NMR spectrum of **1n**

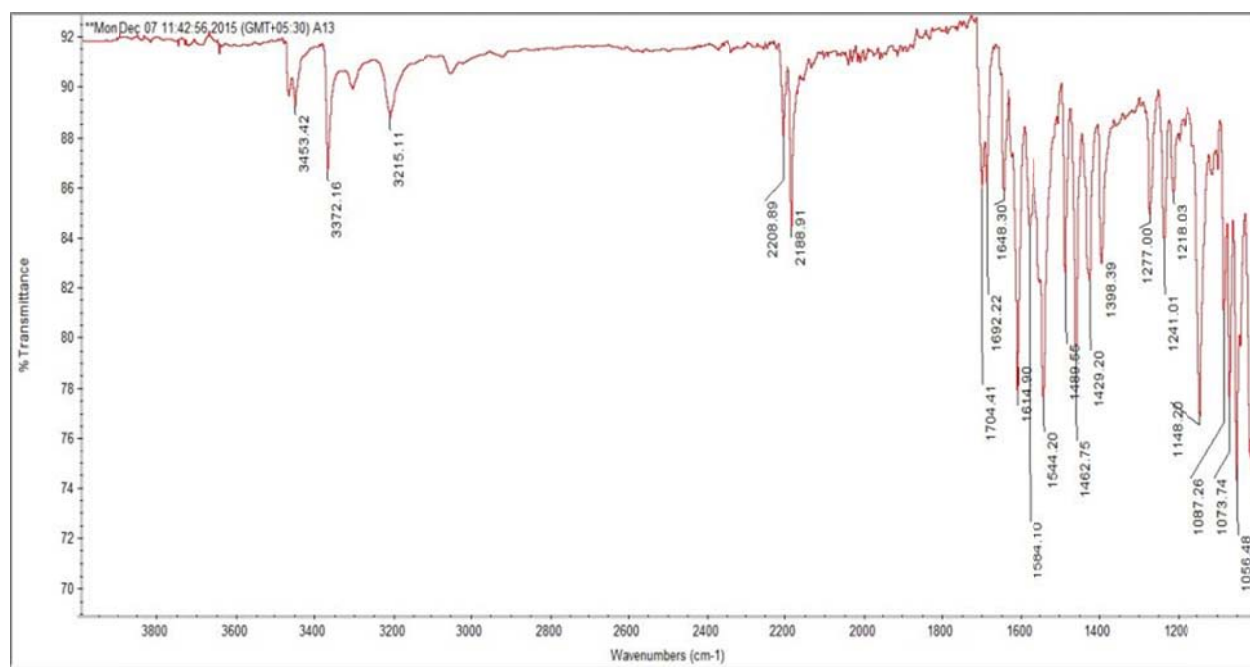

Figure 52. FT-IR spectrum of **1n**



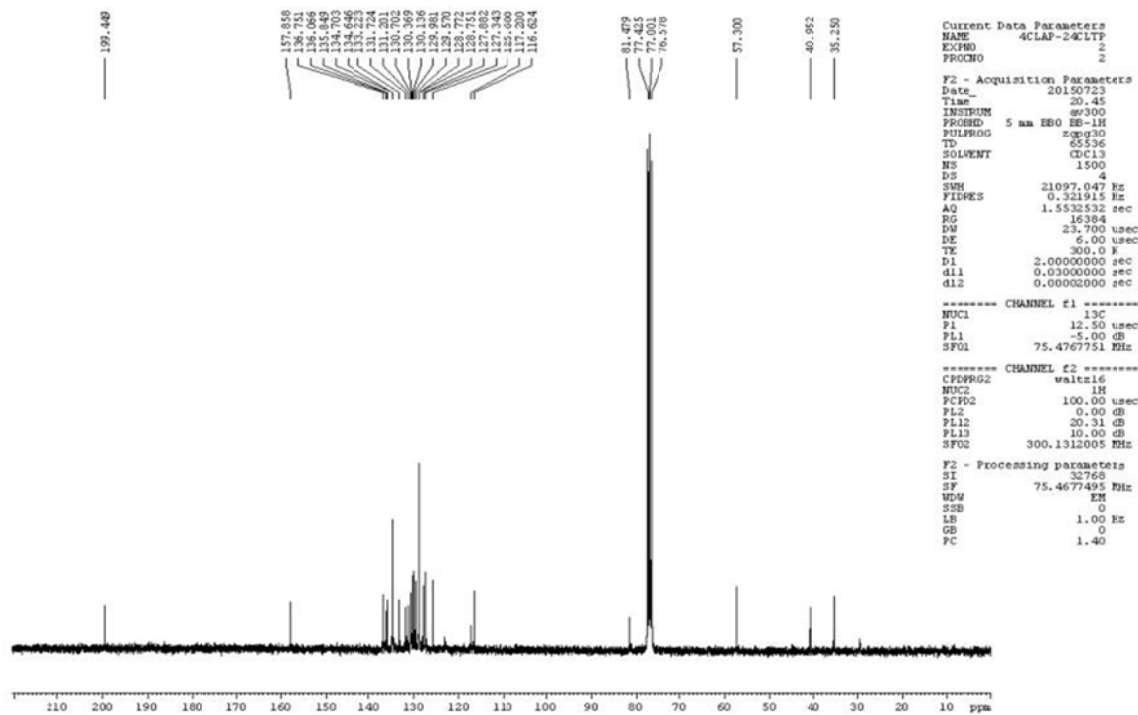

Figure 55.  $^{13}\text{C}$  NMR spectrum of **10**

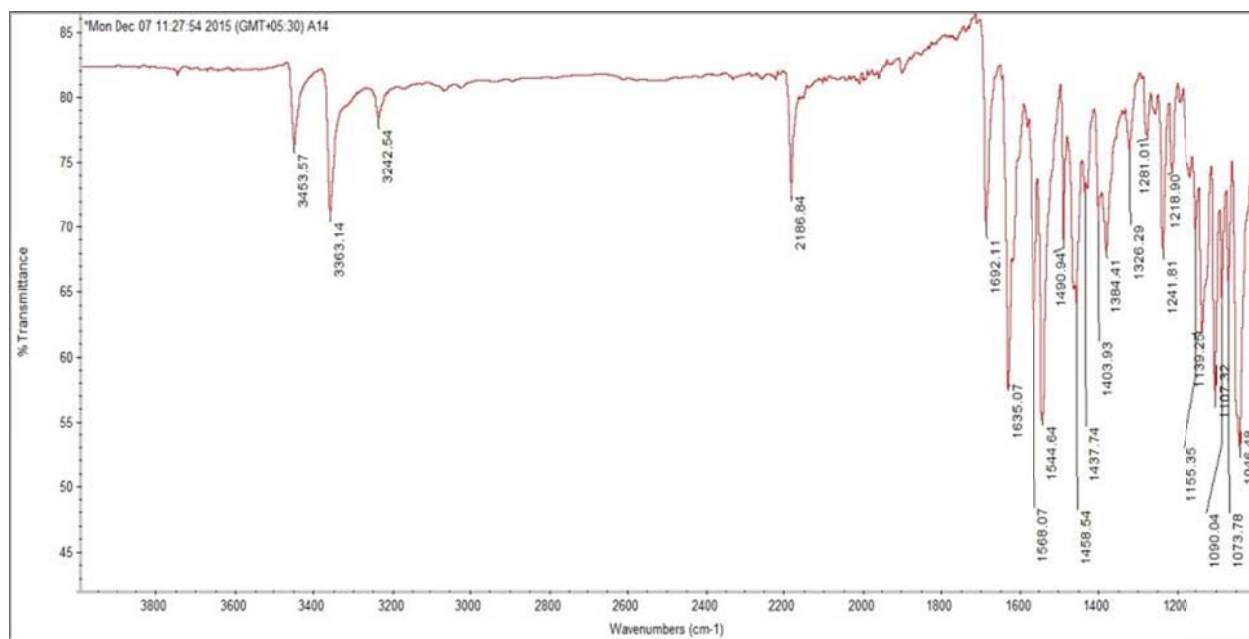

Figure 56. FT-IR spectrum of **10**

A14 #72 RT: 1.02 AV: 1 NL: 9.73E2  
T: ITMS - c ESI Full ms [50.00-1100.00]

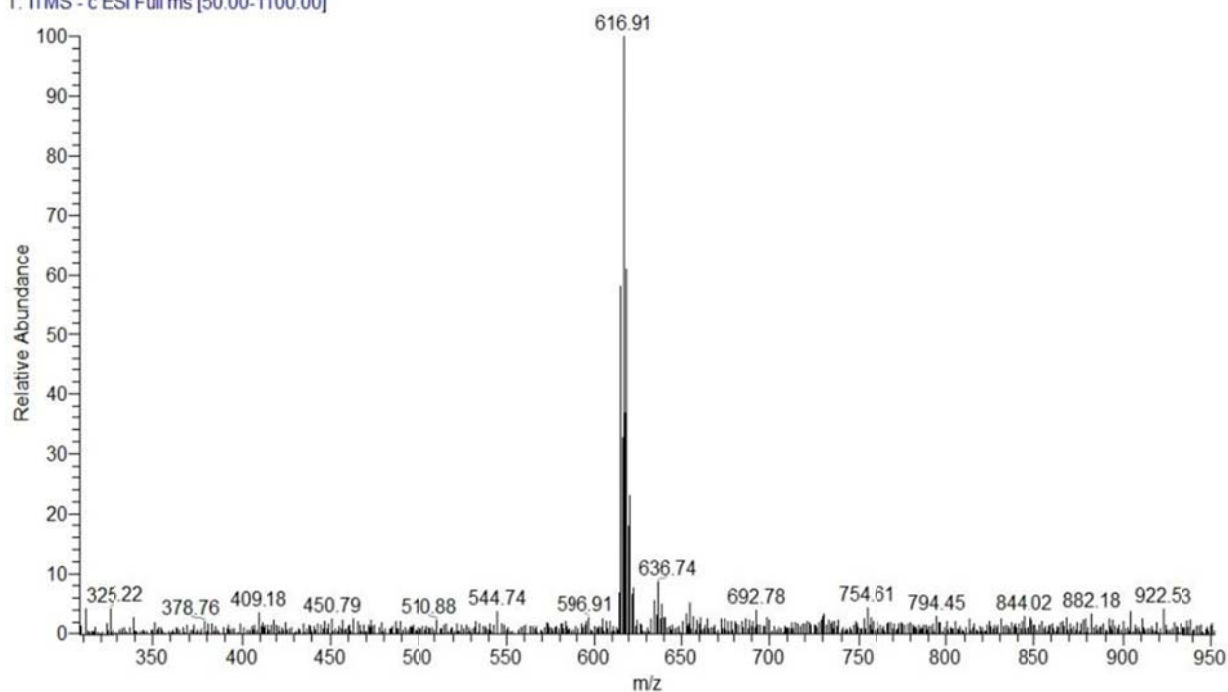

Figure 57. ESI-mass of **1o**

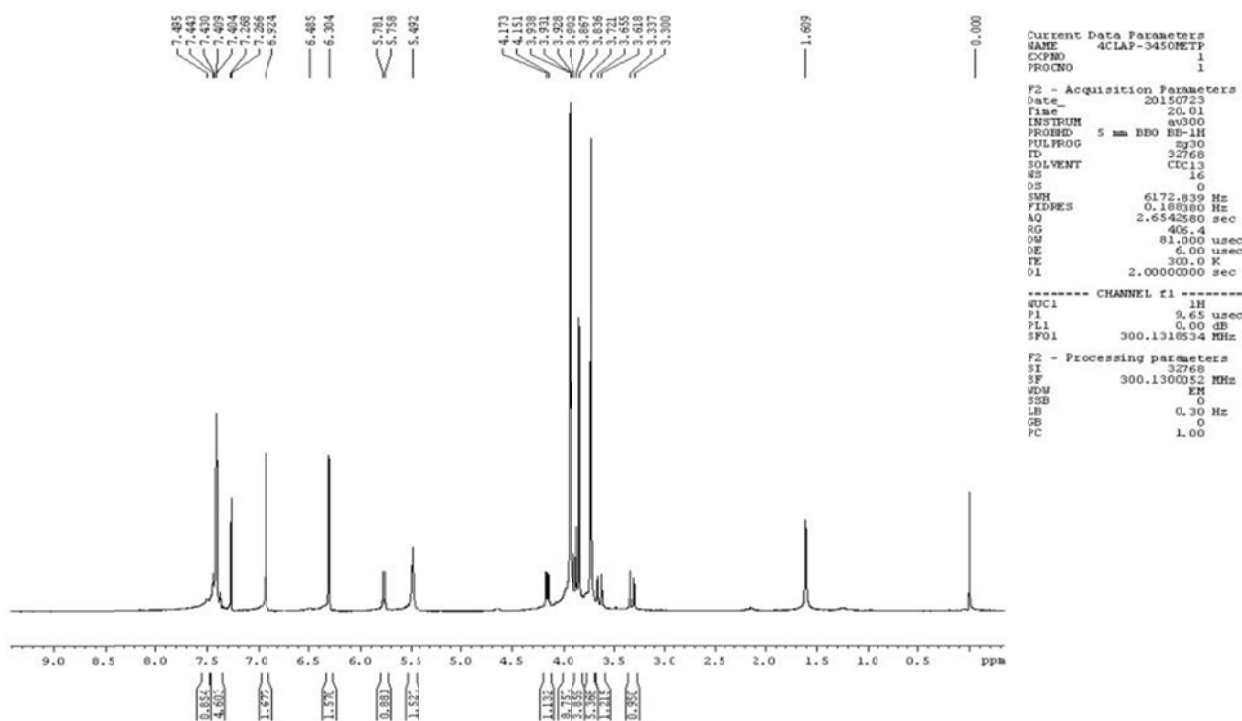

Figure 58. <sup>1</sup>H NMR spectrum of **1p**



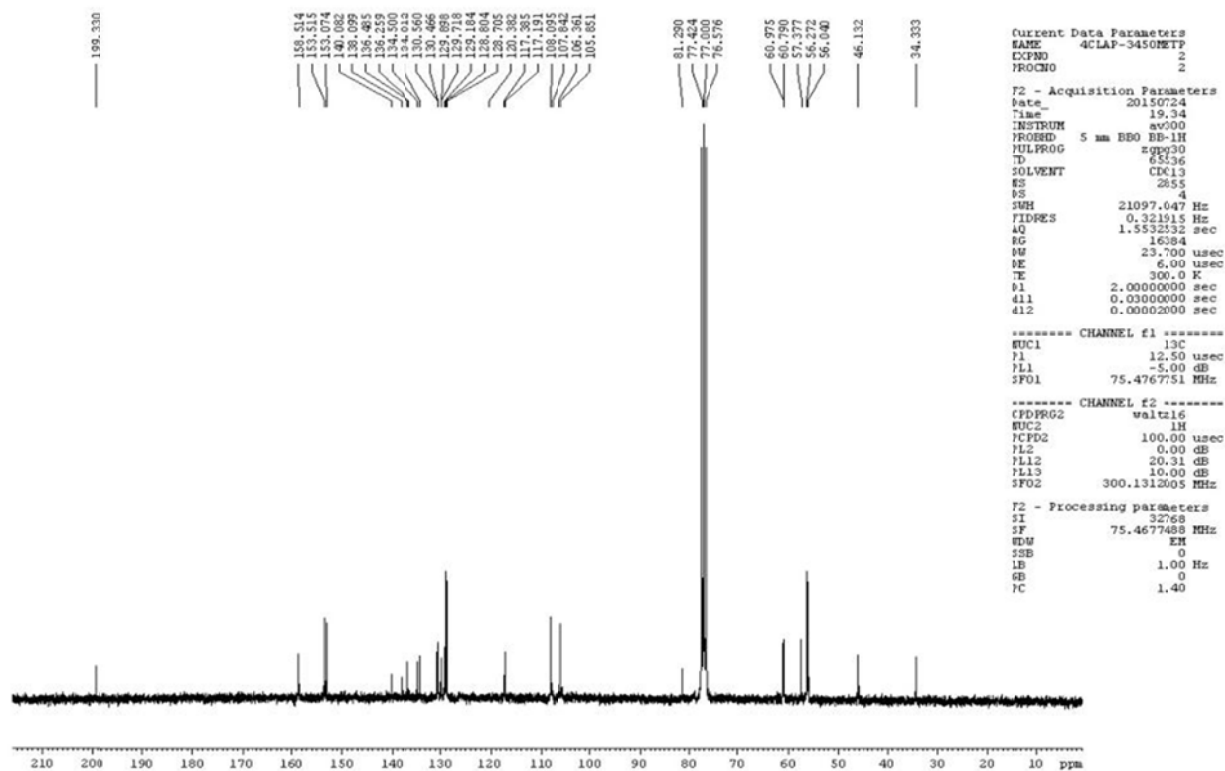

Figure 59.  $^{13}\text{C}$ NMR spectrum of **1p**

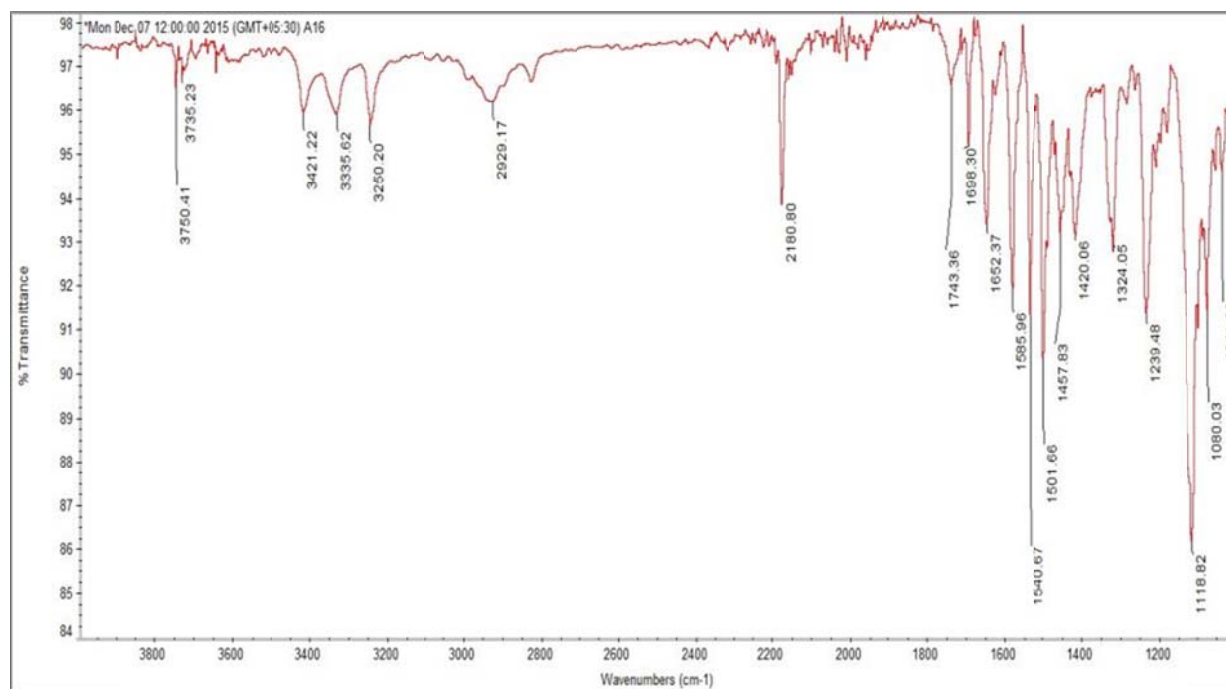

Figure 60. FT-IR spectrum of **1p**

A16 #28 RT: 0.40 AV: 1 NL: 1.22E3  
T: ITMS - c ESI Full ms [50.00-1100.00]

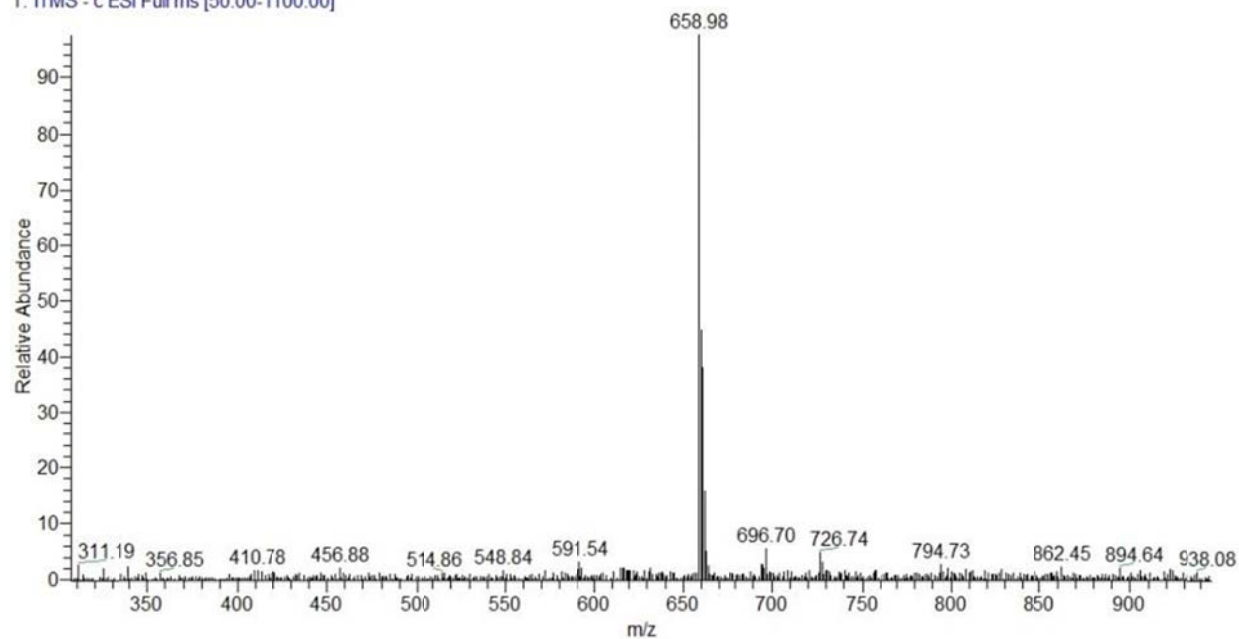

Figure 61. ESI-mass of 1p

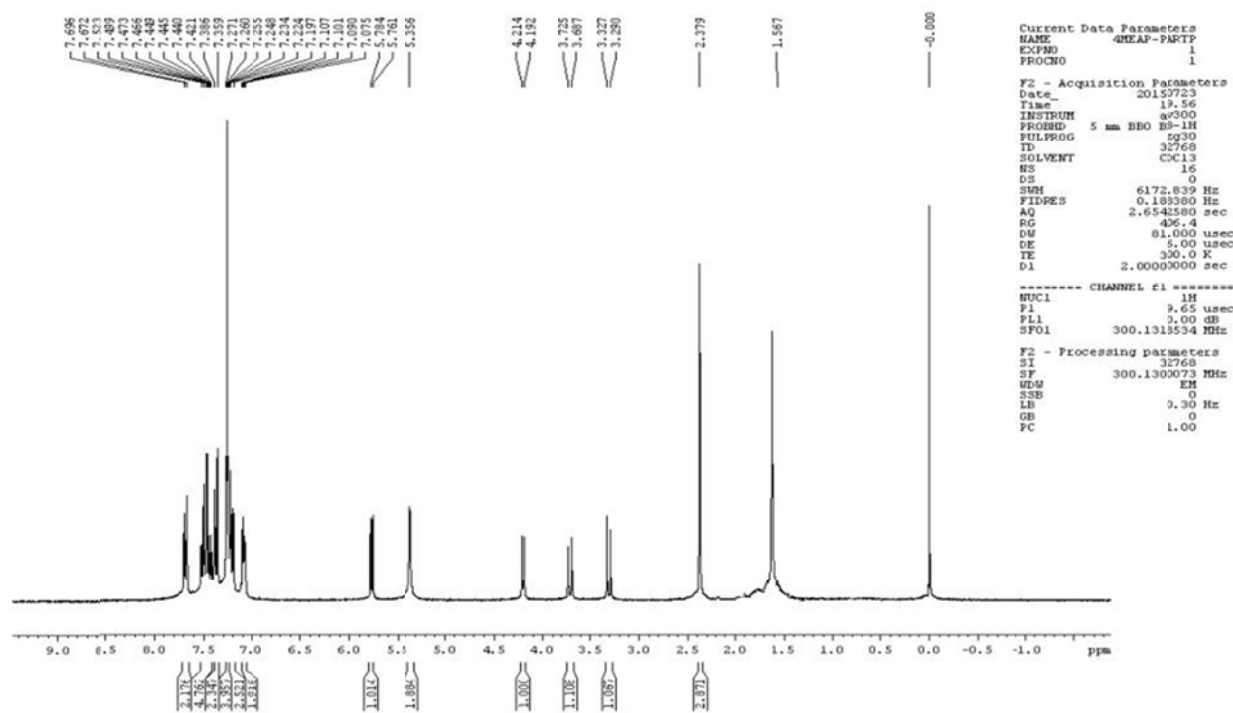

Figure 62. <sup>1</sup>H NMR spectrum of 1q

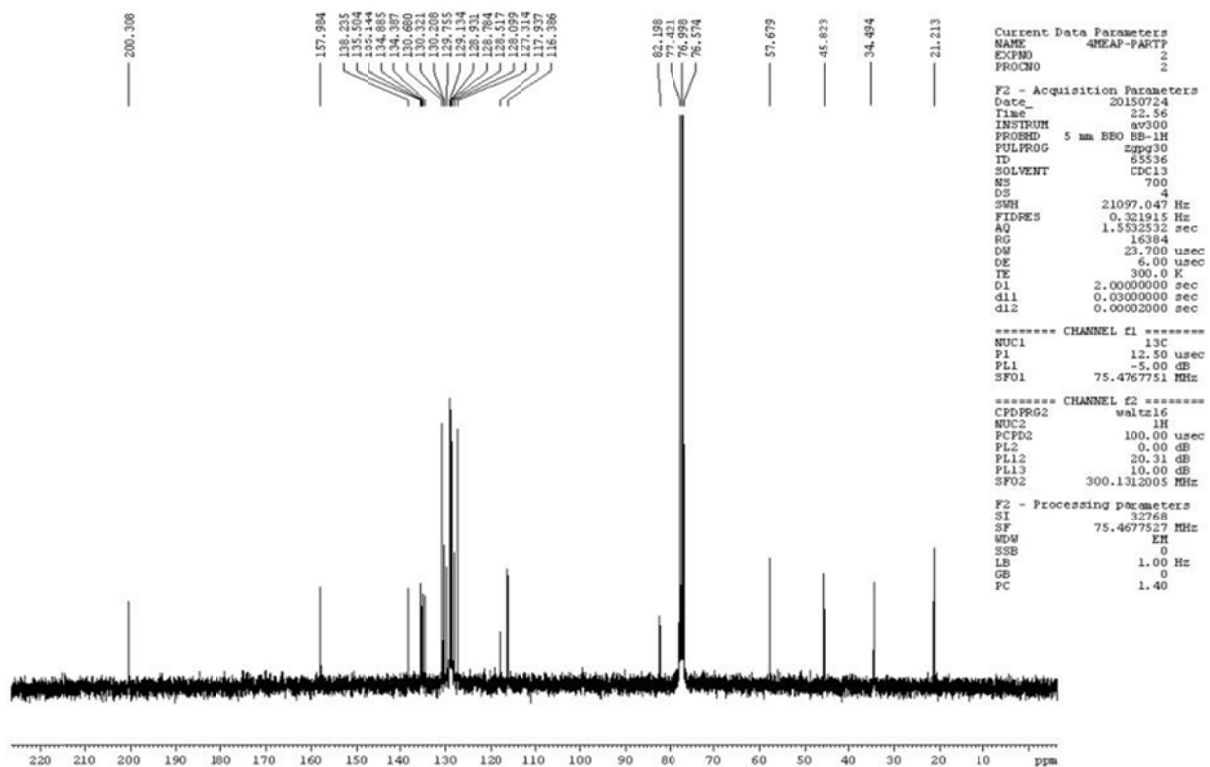

Figure 63.  $^{13}\text{C}$  NMR spectrum of **1q**

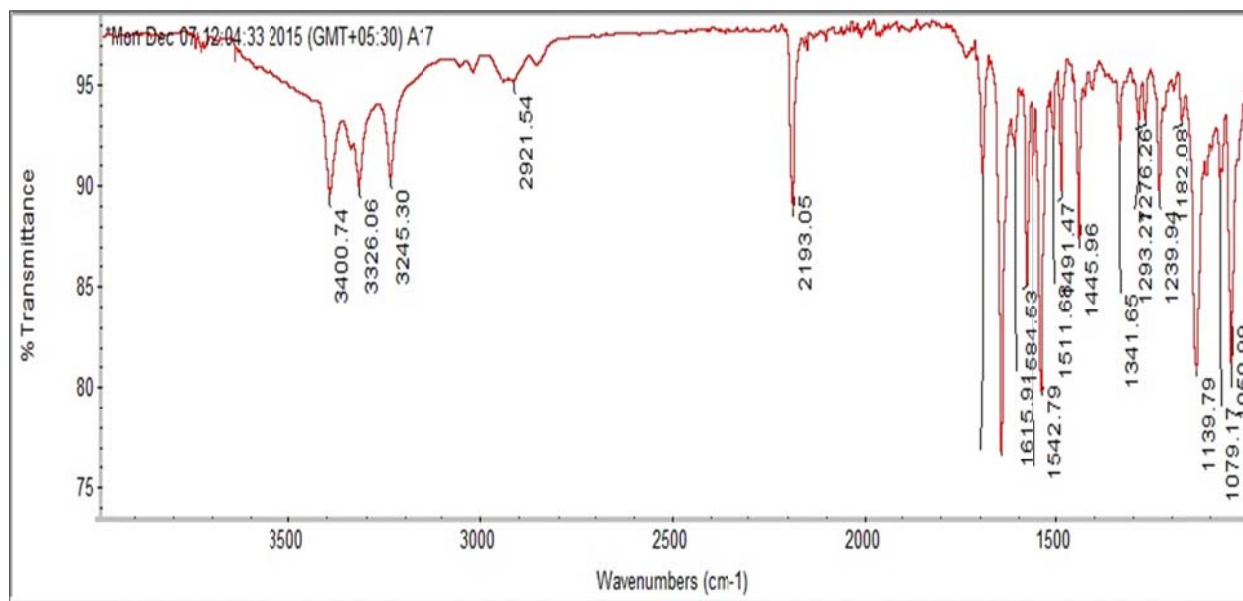

Figure 64. FT-IR spectrum of **1q**



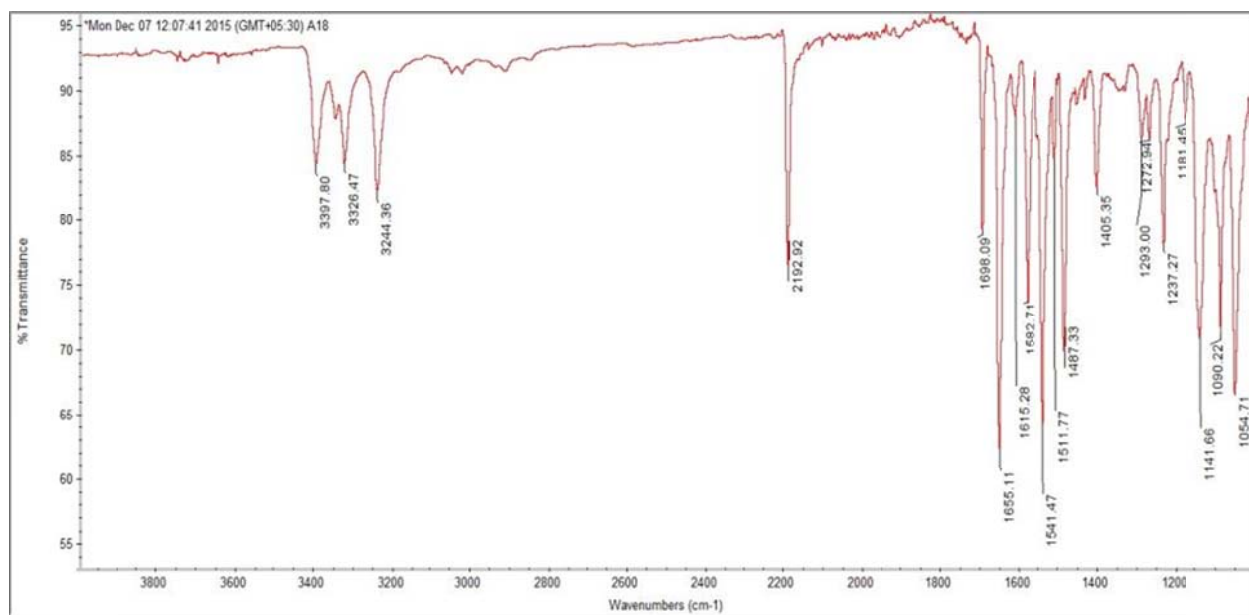

**Figure 67.** FT-IR spectrum of **1r**

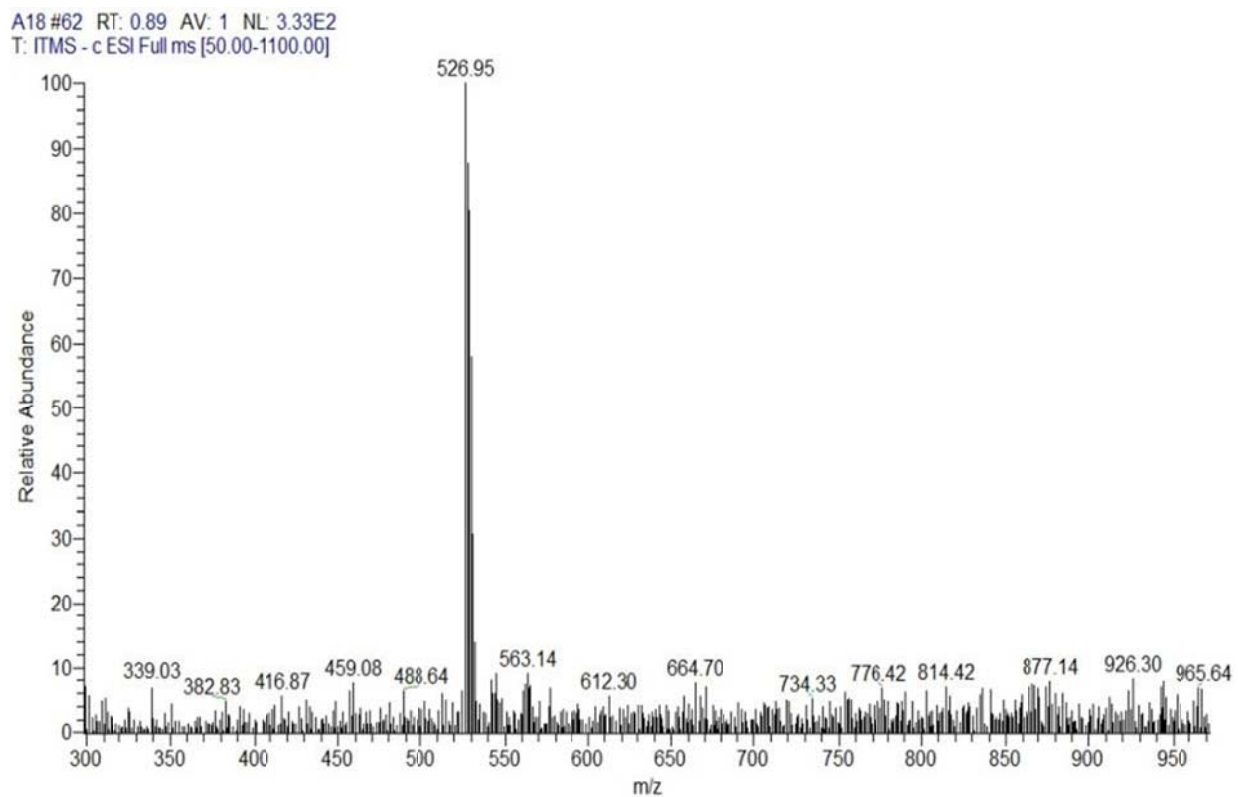

**Figure 68.** ESI-mass of **1r**

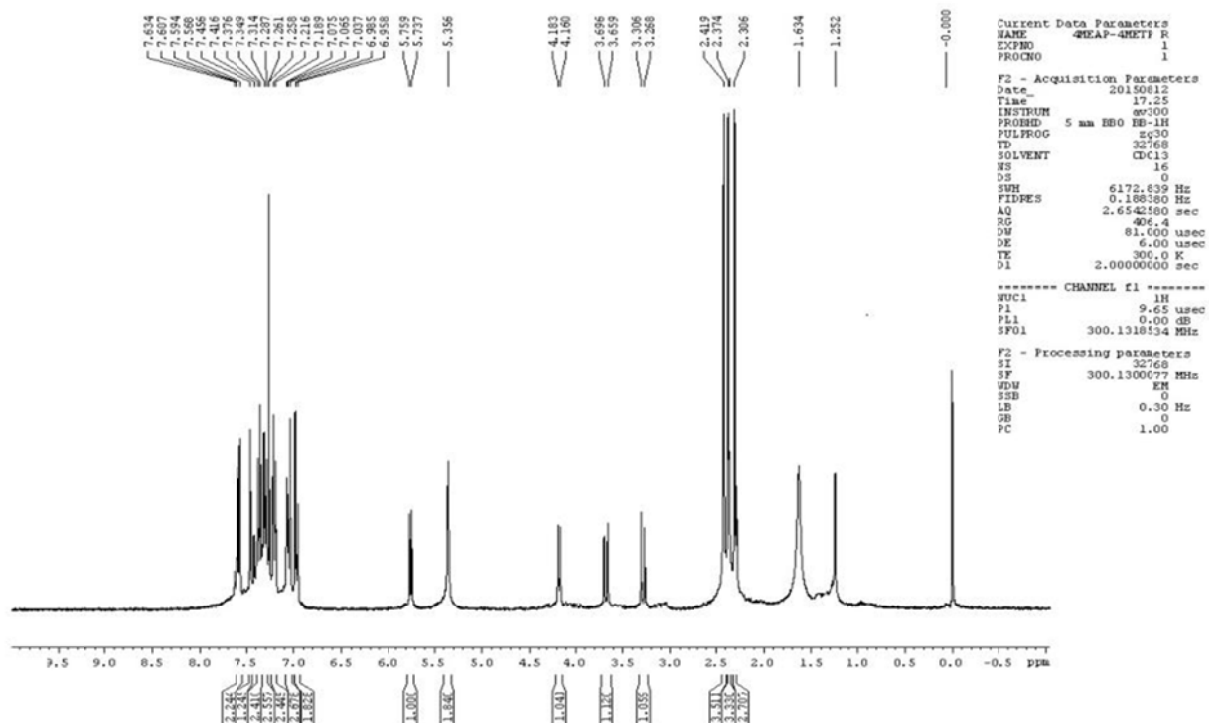

Figure 69.  $^1\text{H}$ NMR spectrum of **1s**

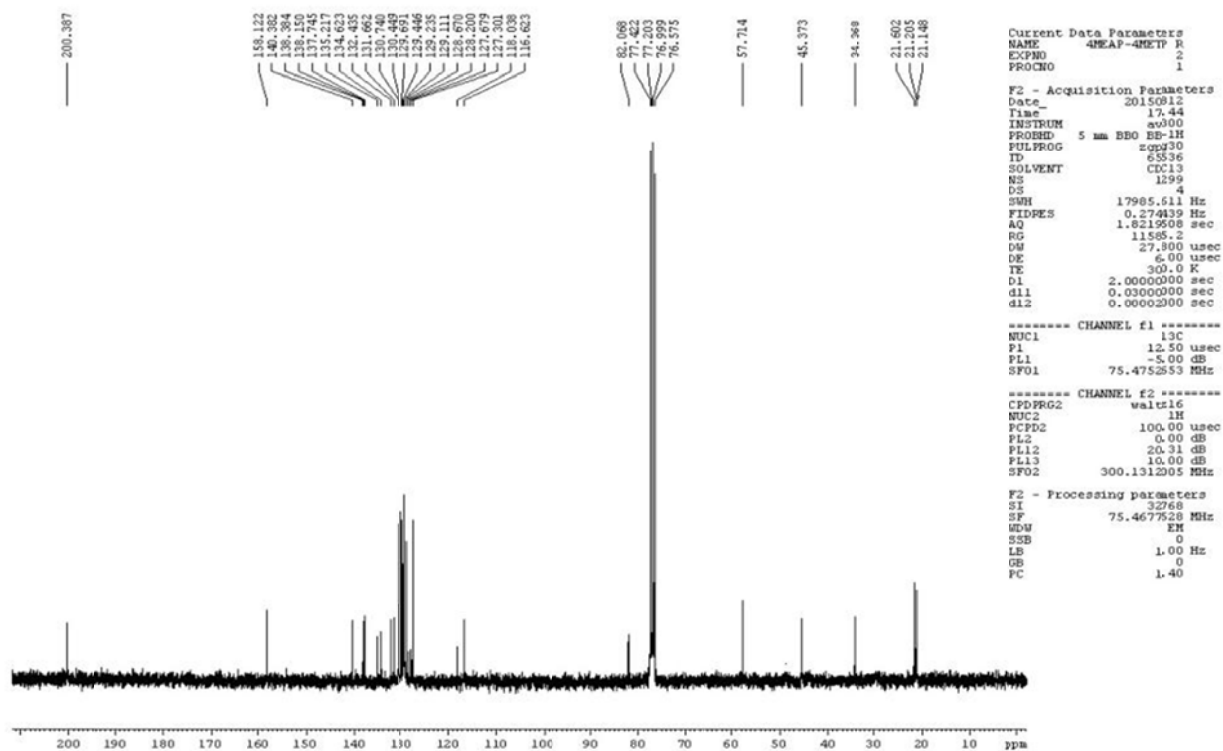

Figure 70.  $^{13}\text{C}$ NMR spectrum of **1s**

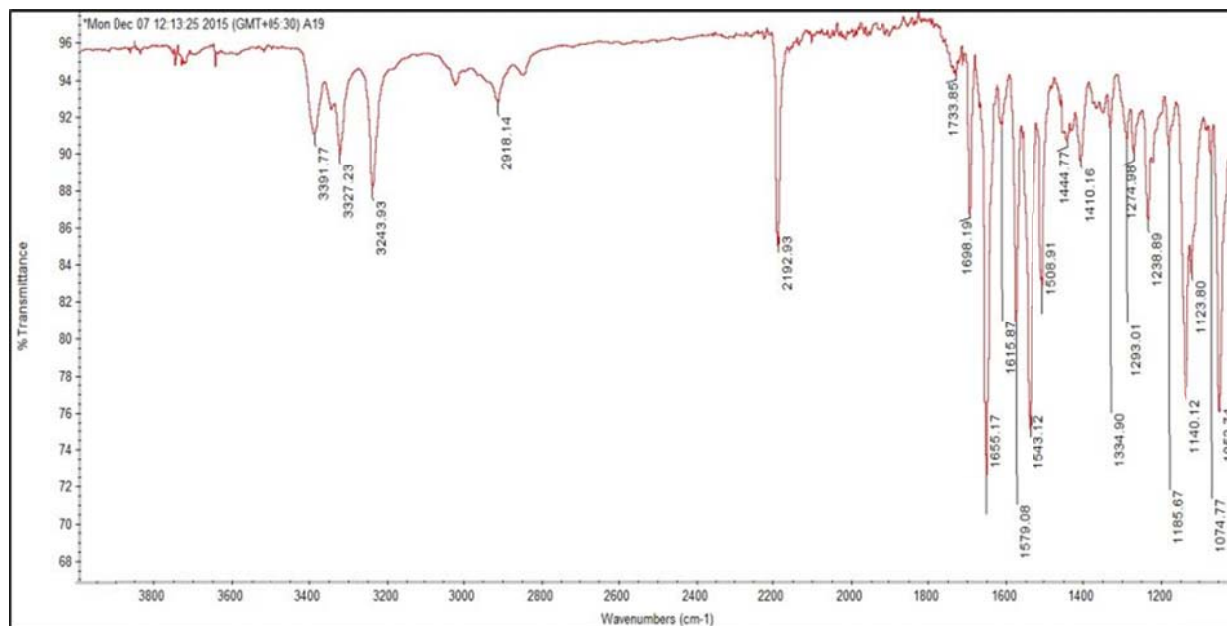

**Figure 71.** FT-IR spectrum of **1s**

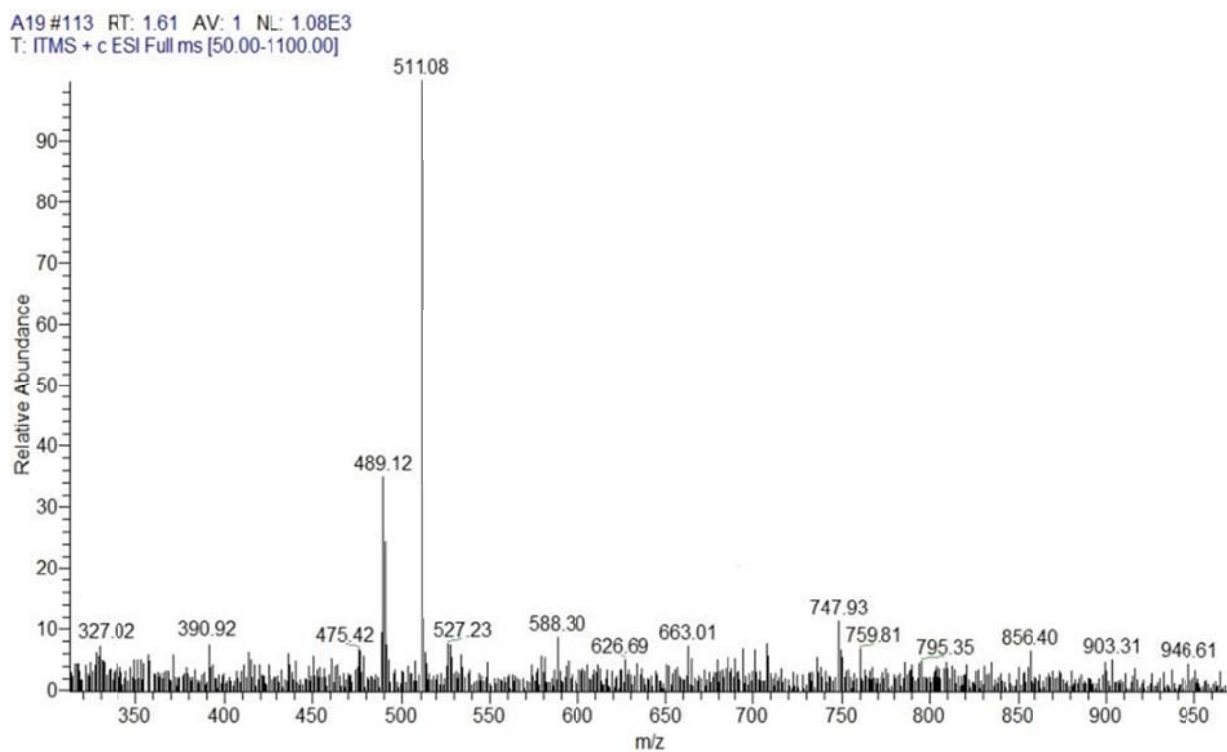

**Figure 72.** ESI-mass of **1s**

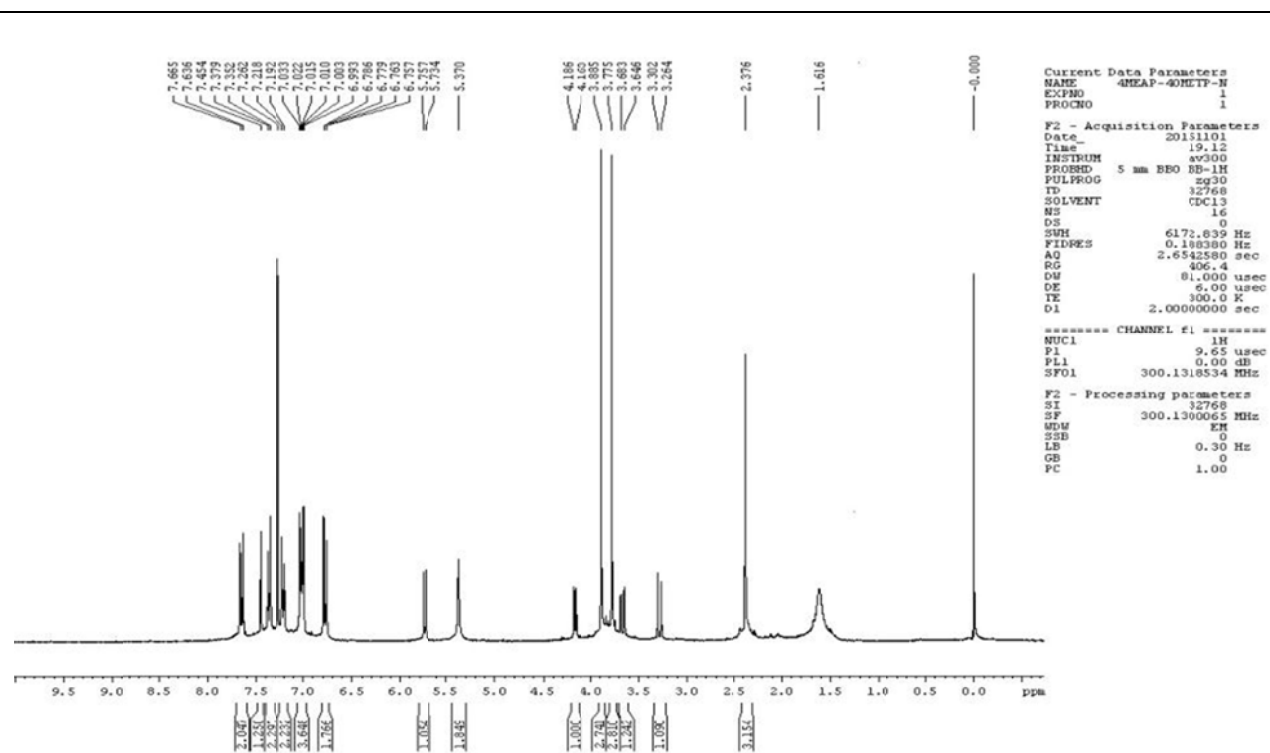

Figure 73.  $^1\text{H}$ NMR spectrum of **1t**

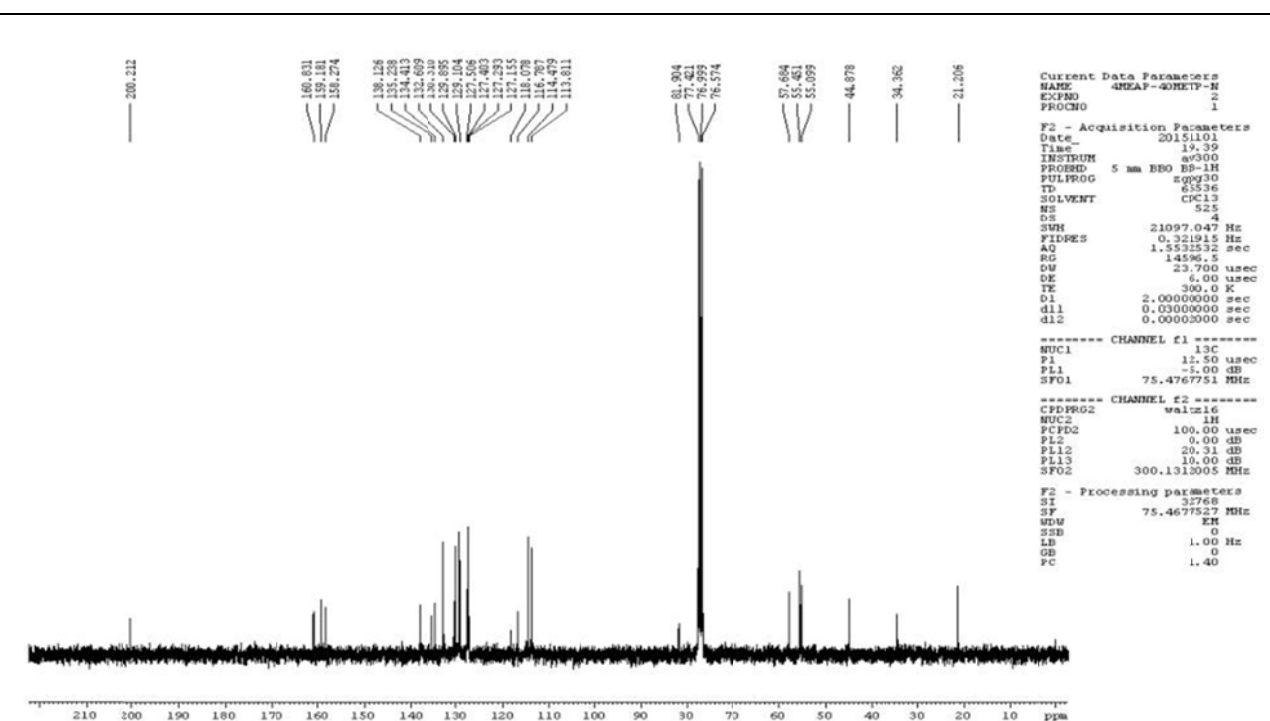

Figure 74.  $^{13}\text{C}$ NMR spectrum of **1t**



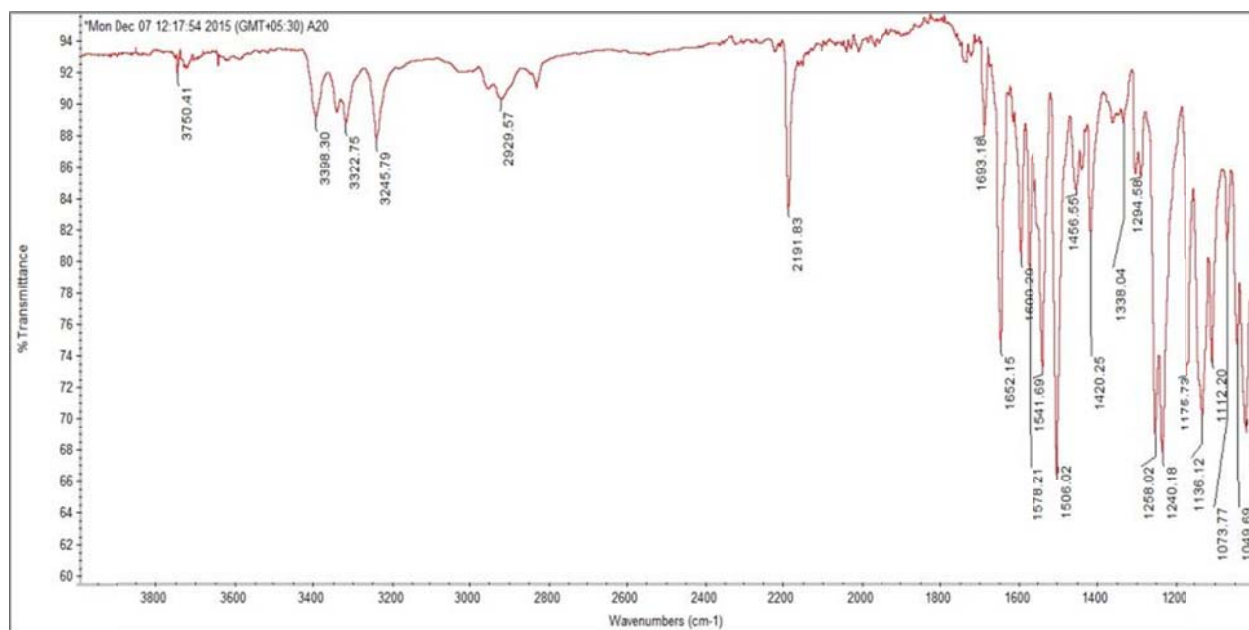

**Figure 75.** FT-IR spectrum of **1t**

A20 #59 RT: 0.84 AV: 1 NL: 5.13E2  
T: ITMS + c ESI Full ms [50.00-1100.00]

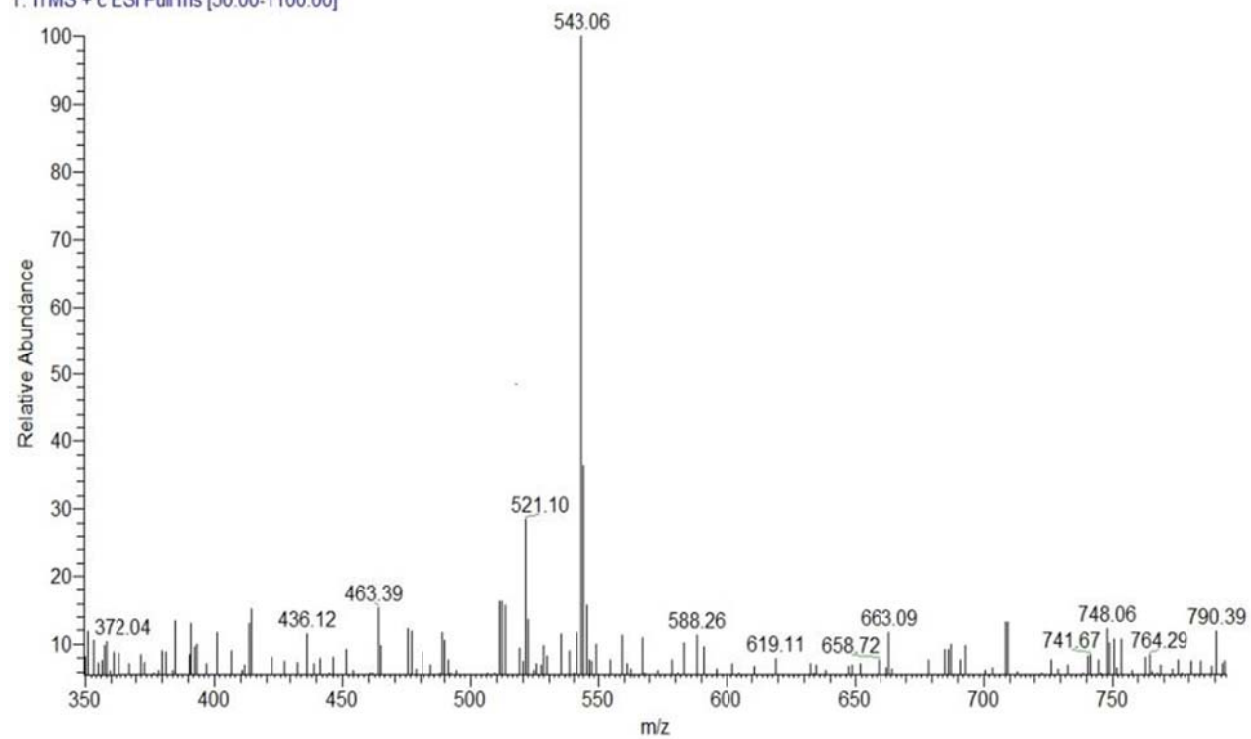

**Figure 76.** ESI-mass of **1t**

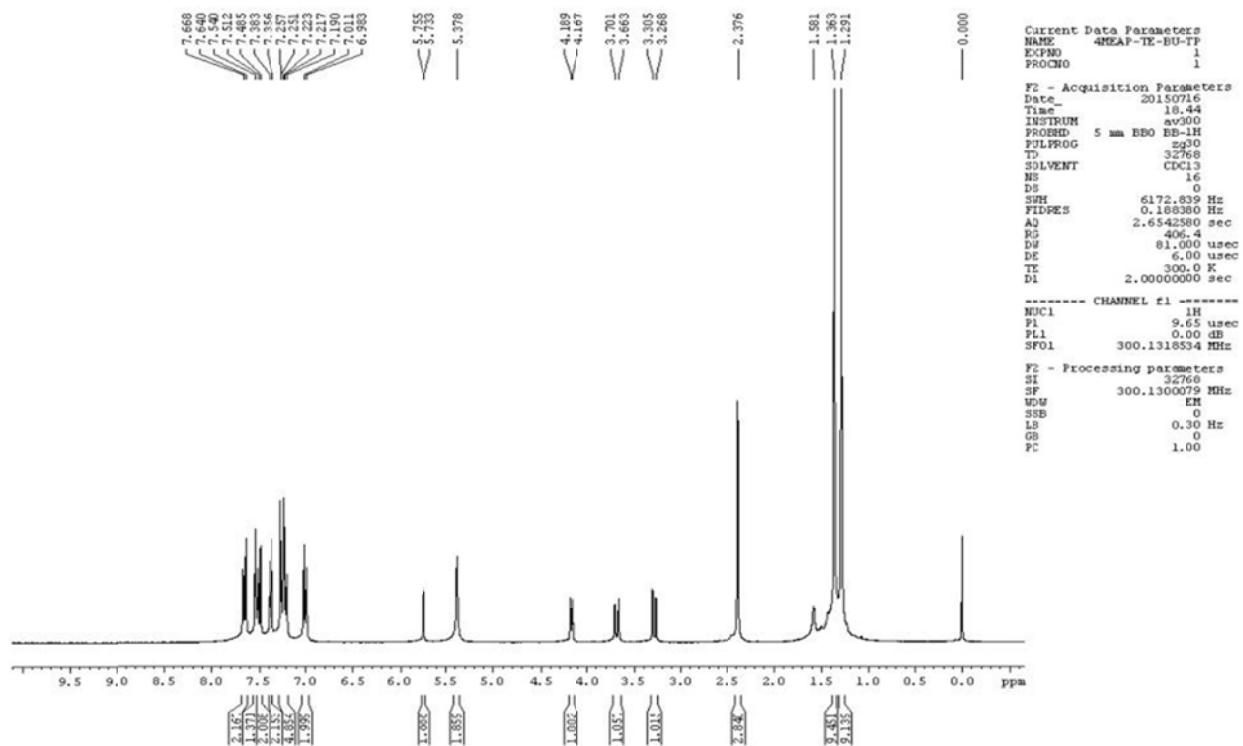

Figure 77.  $^1\text{H}$ NMR spectrum of **1u**

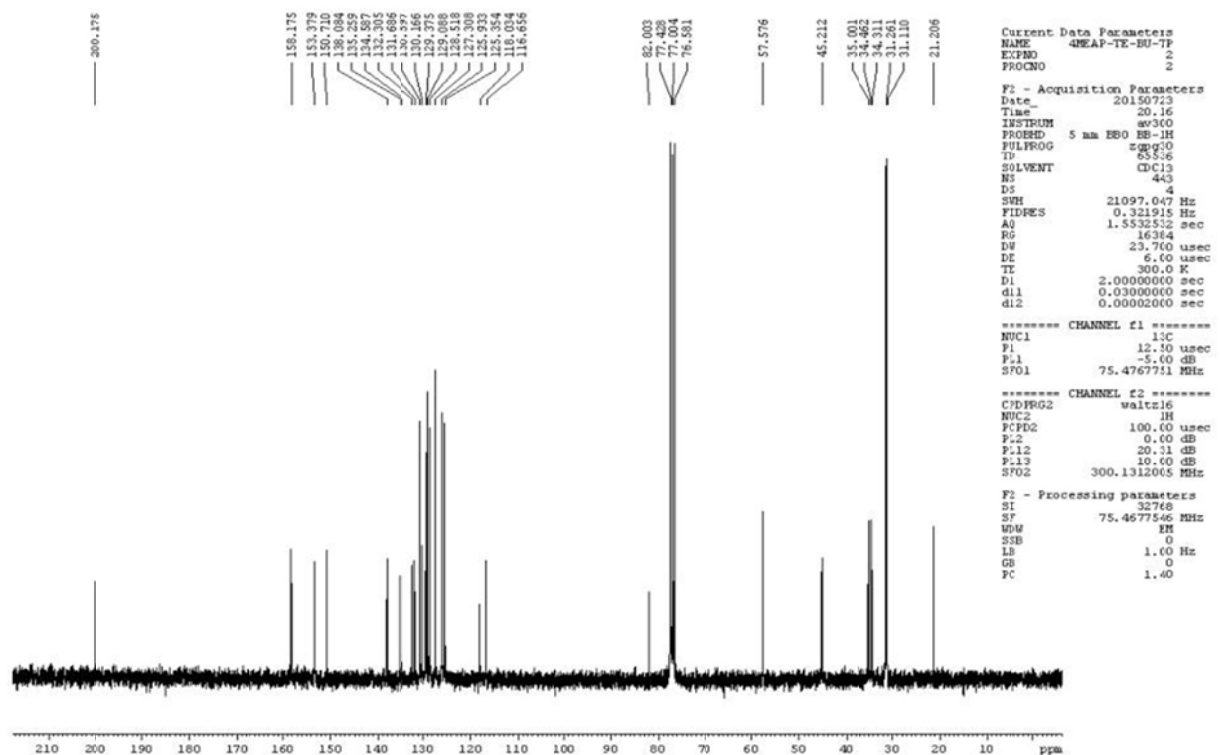

Figure 78.  $^{13}\text{C}$ NMR spectrum of **1u**

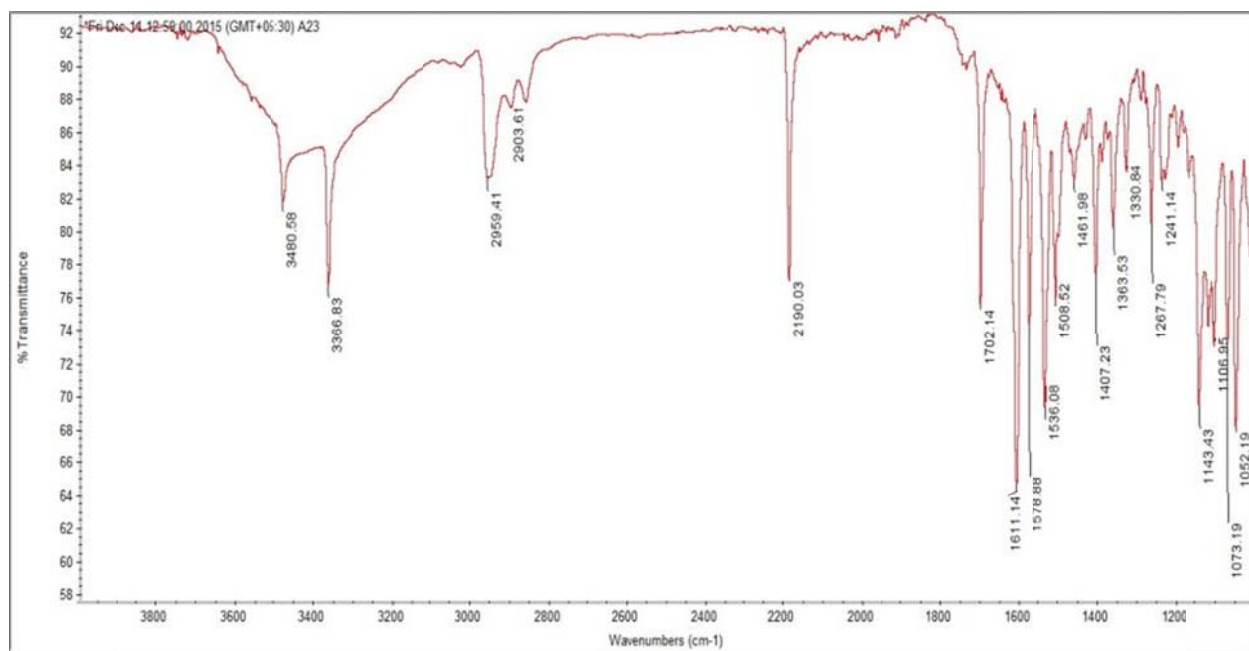

**Figure 79.** FT-IR spectrum of **1u**

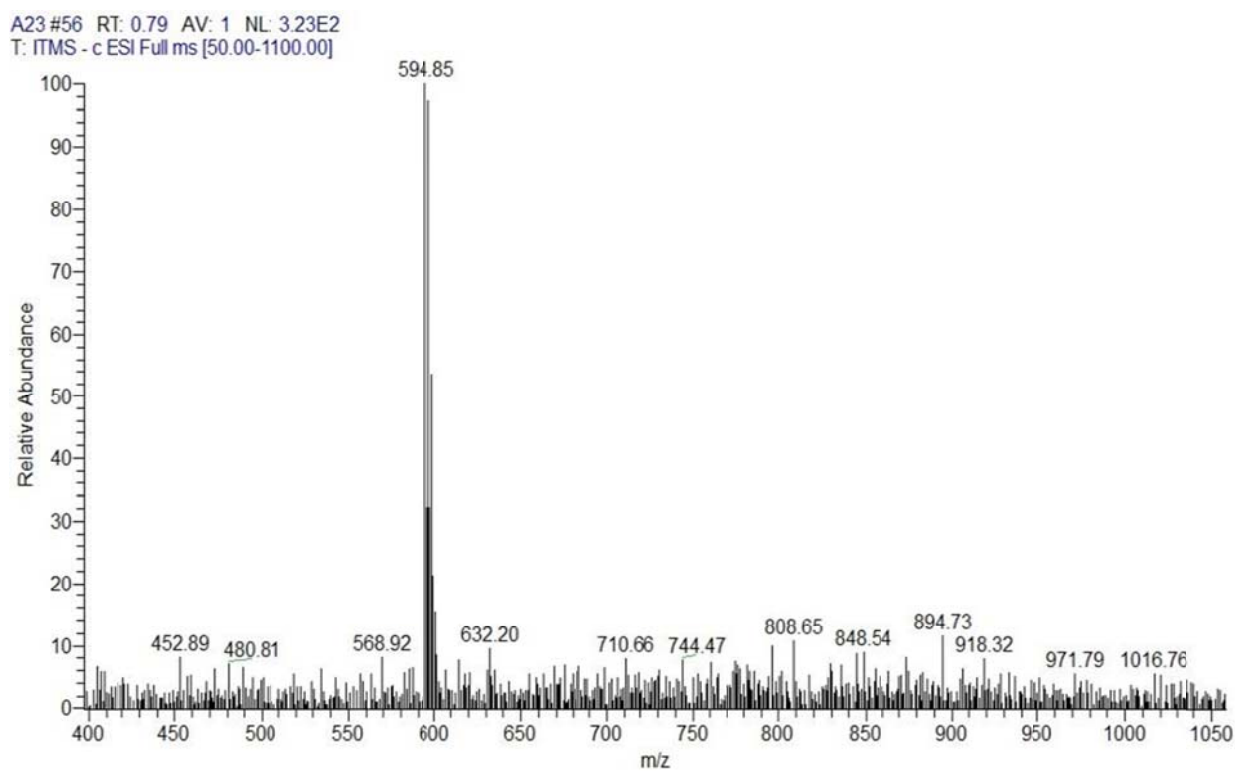

**Figure 80.** ESI-massof **1u**

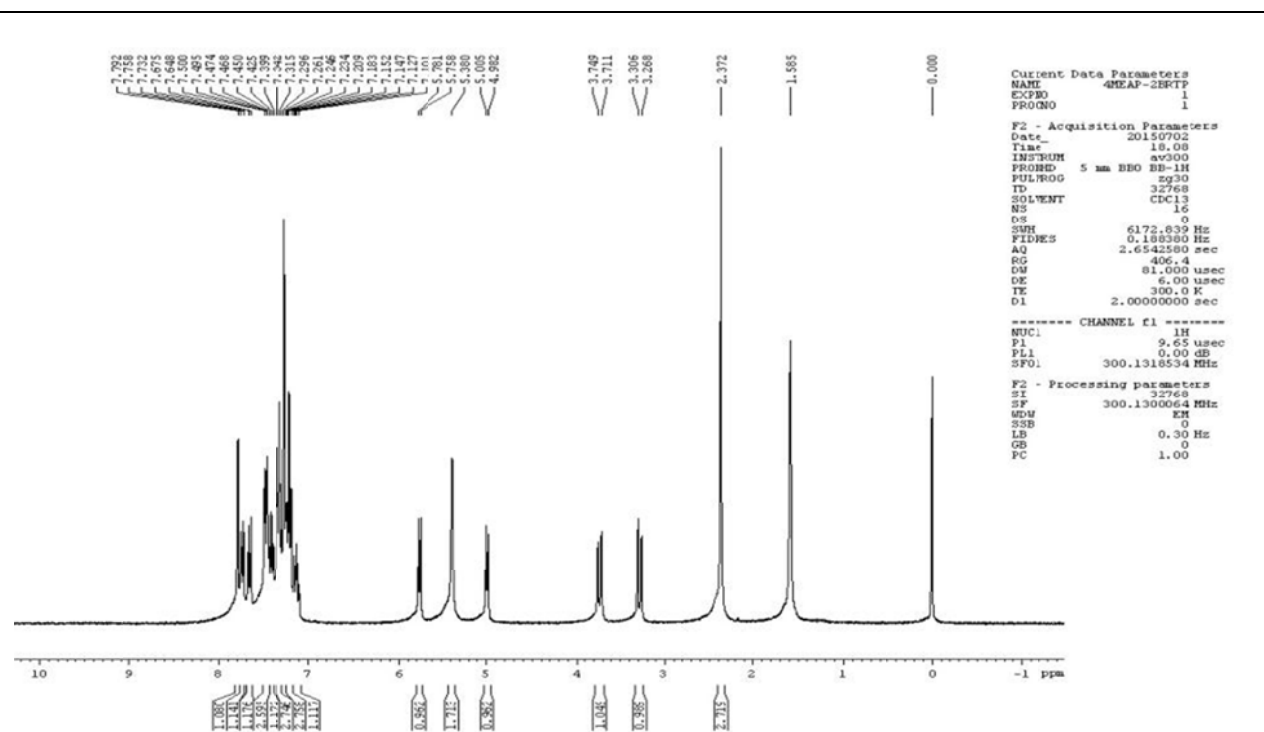

Figure 81.  $^1\text{H}$ NMR spectrum of **1v**

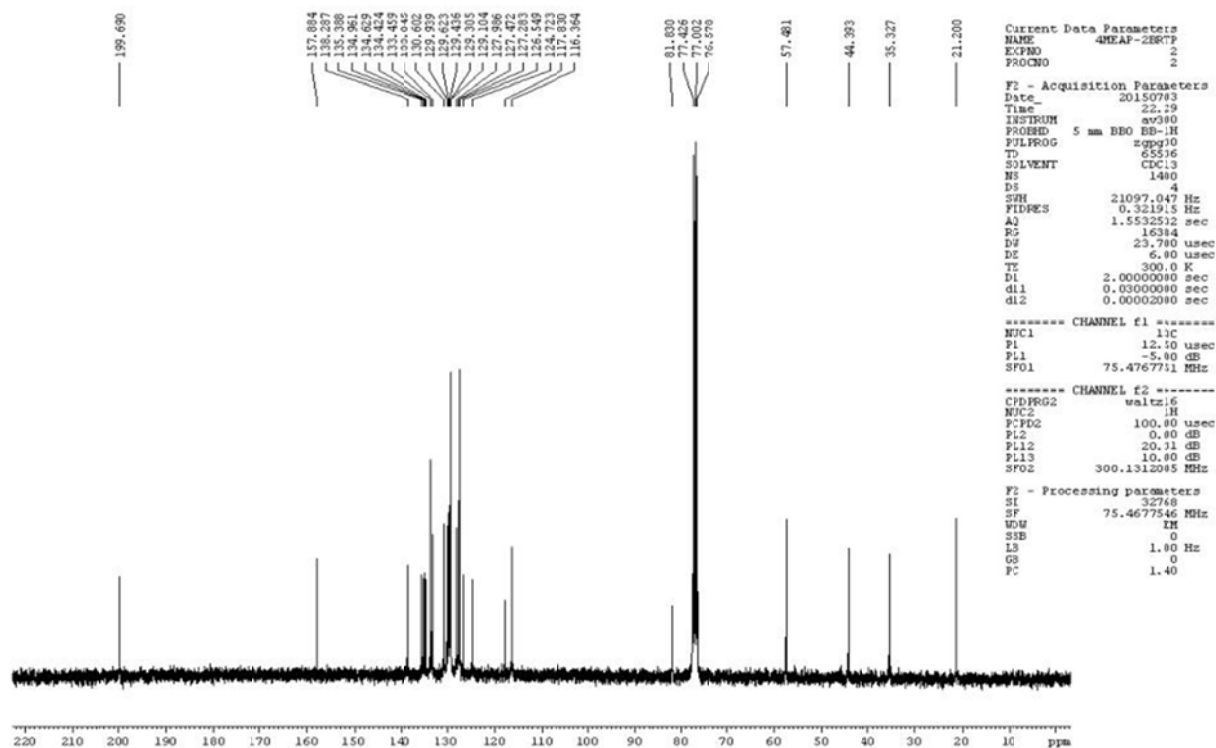

Figure 82.  $^{13}\text{C}$ NMR spectrum of **1v**

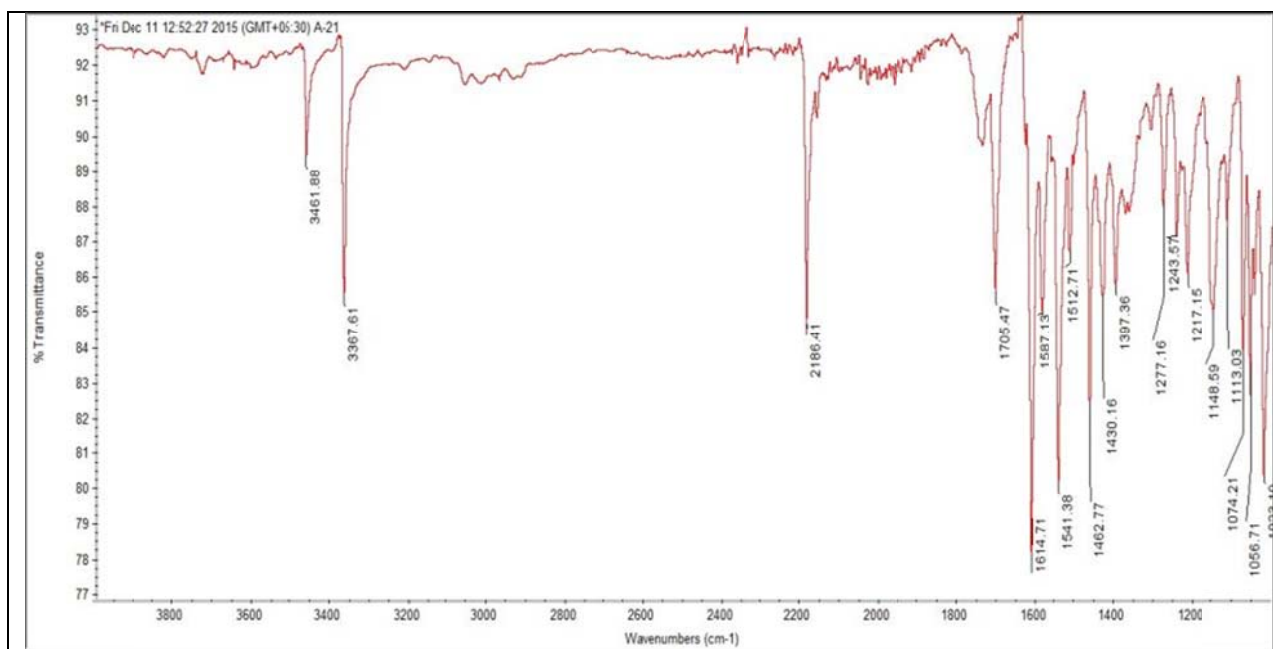

**Figure 83.** FT-IR spectrum of **1v**

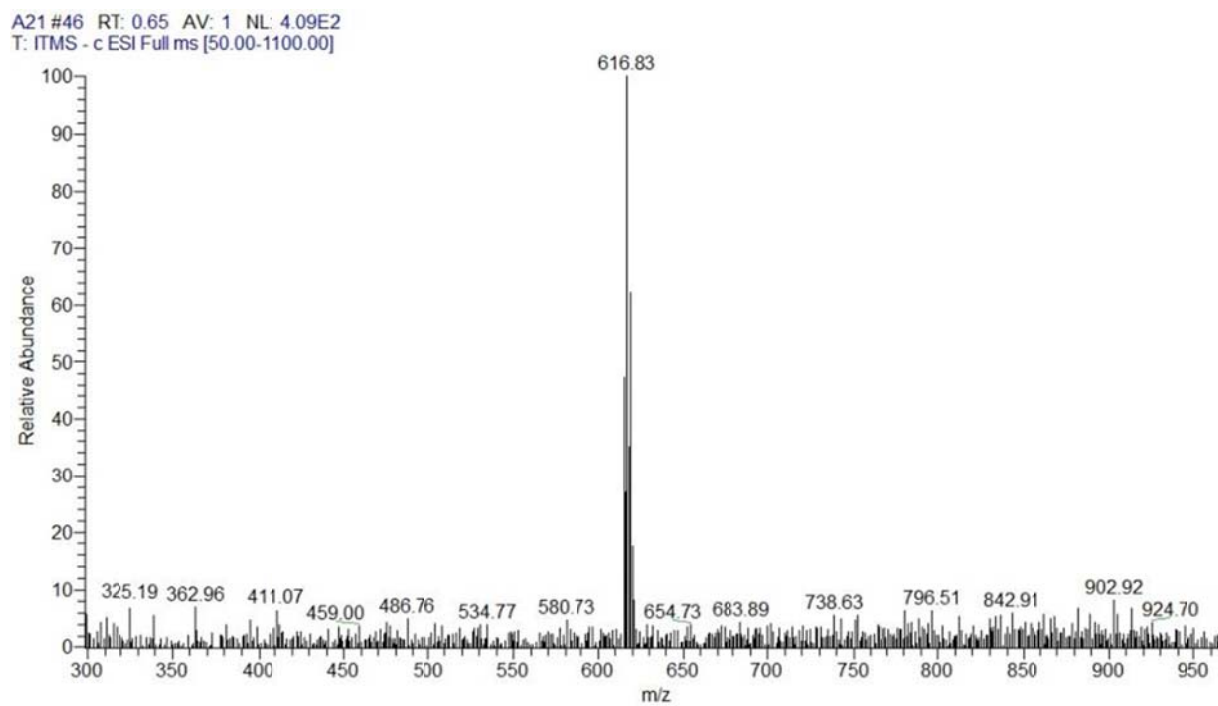

**Figure 84.** ESI-mass of **1v**

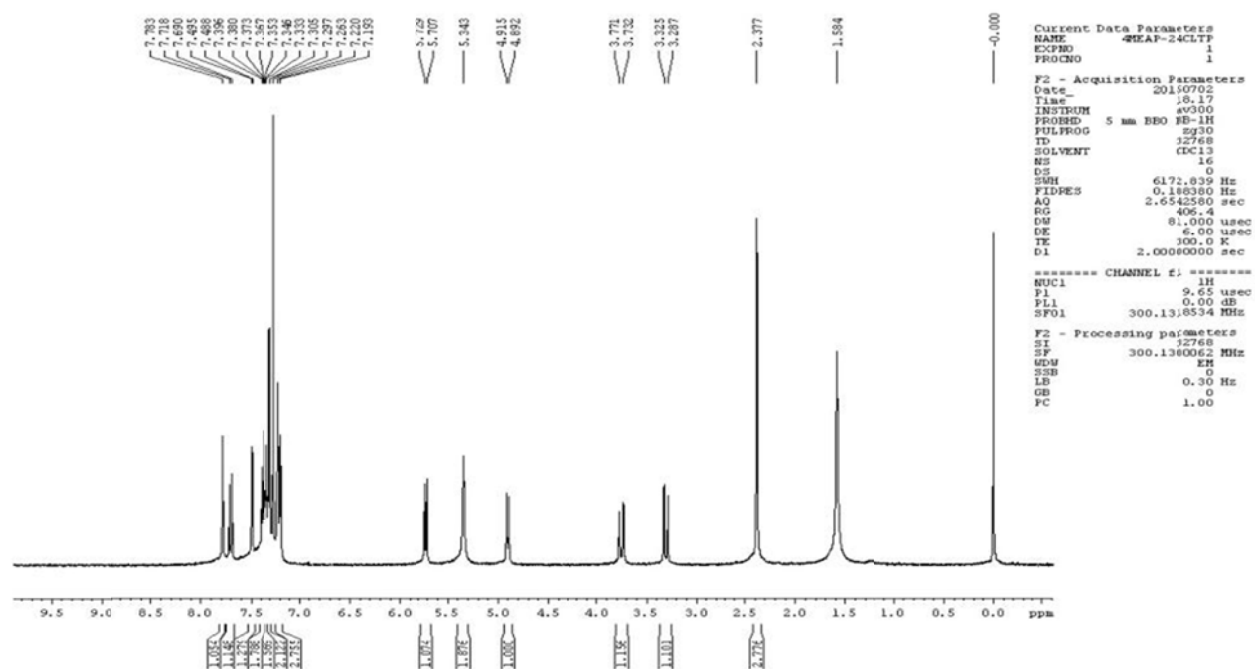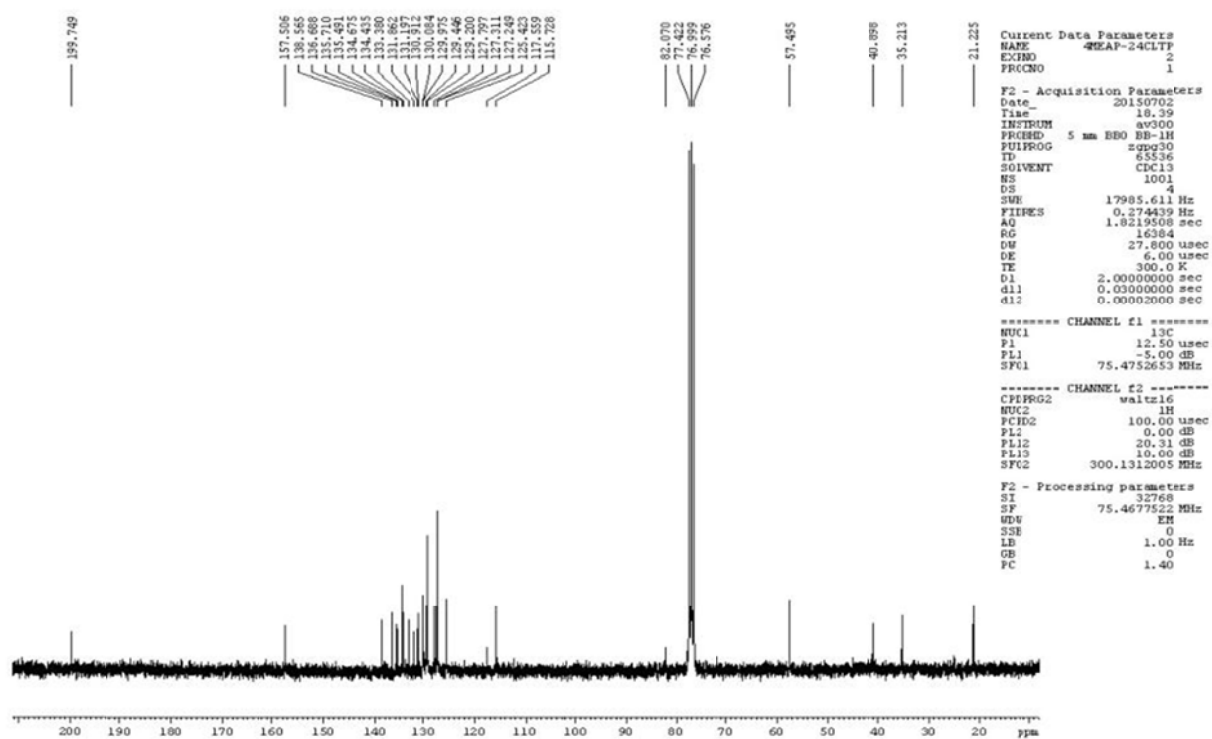

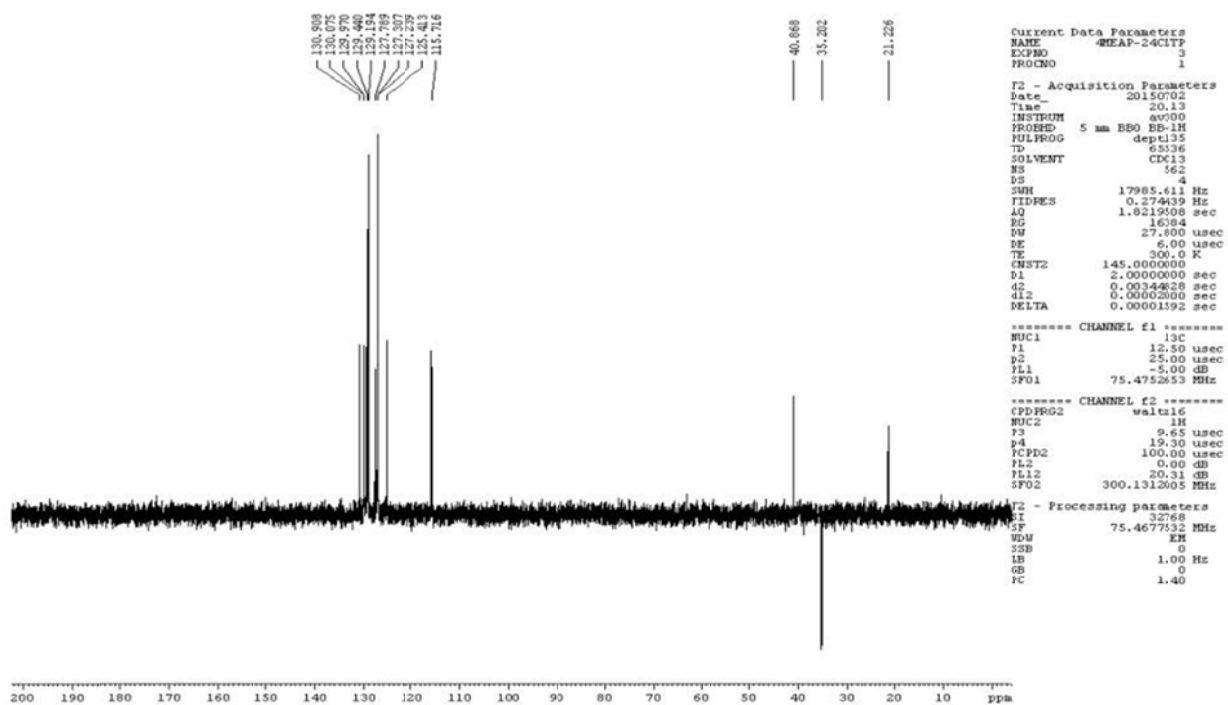

Figure 87. DEPT spectrum of 1w

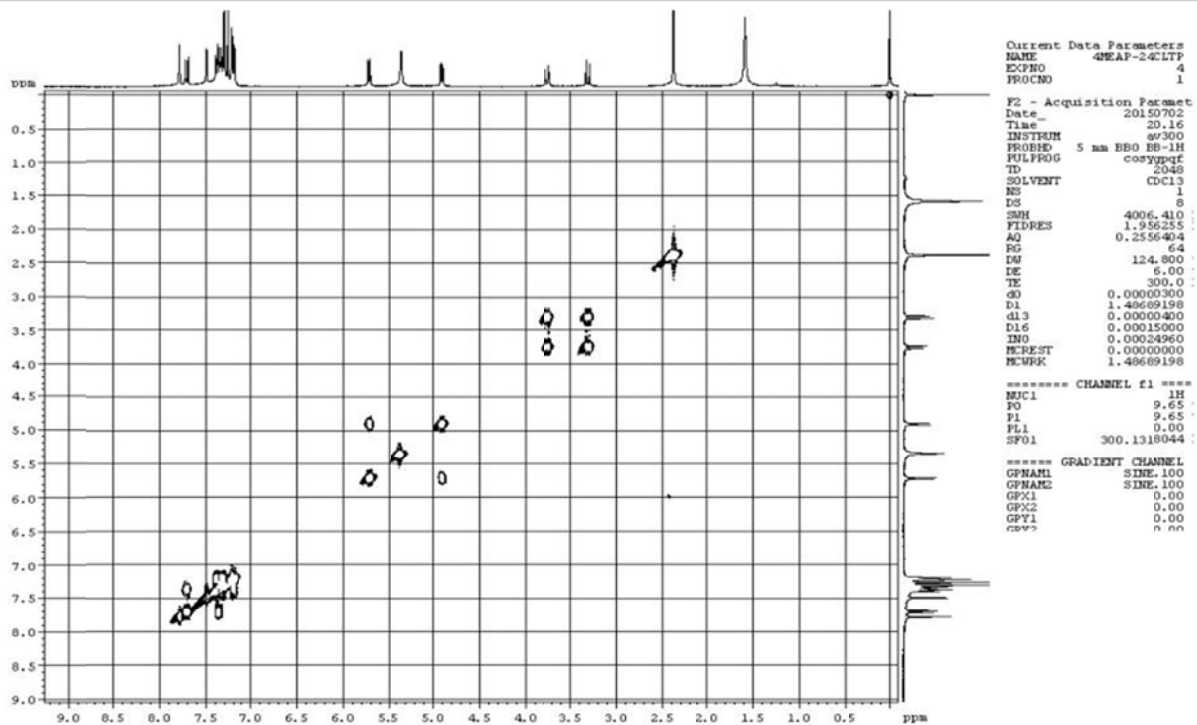

Figure 88. H-H COSY spectrum of 1w

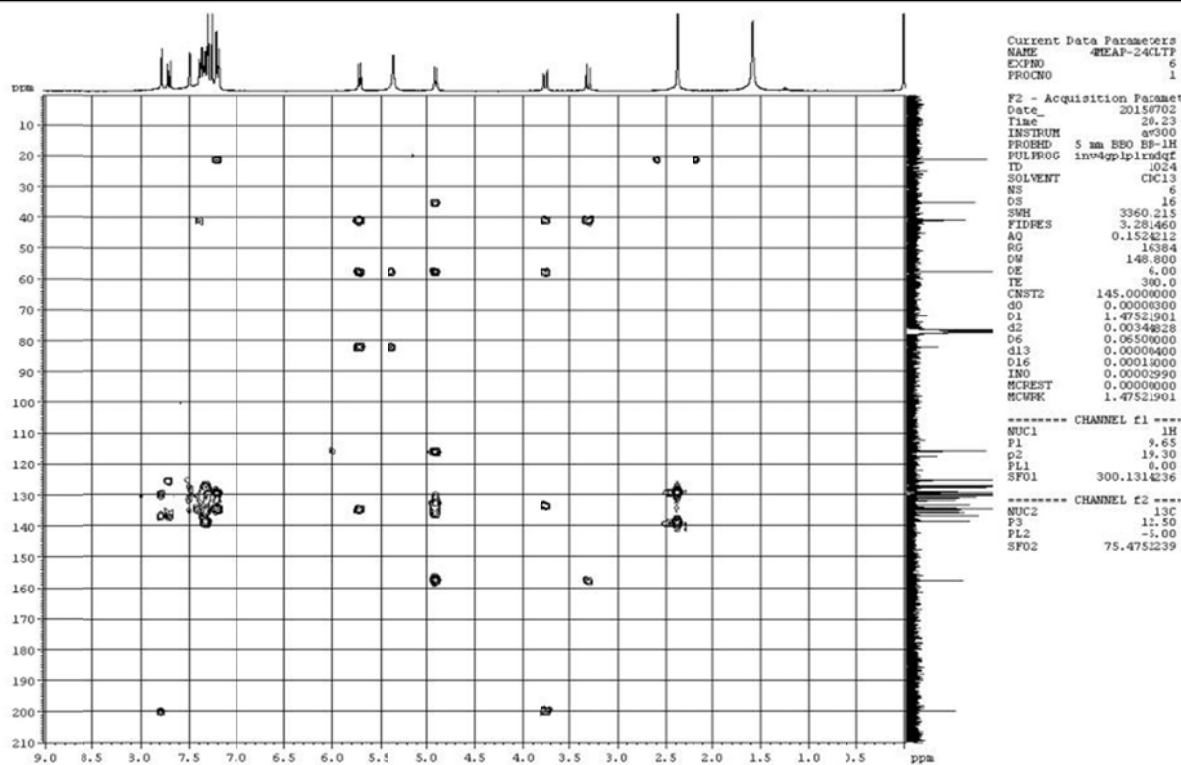

Figure 89. HMBC spectrum of 1w

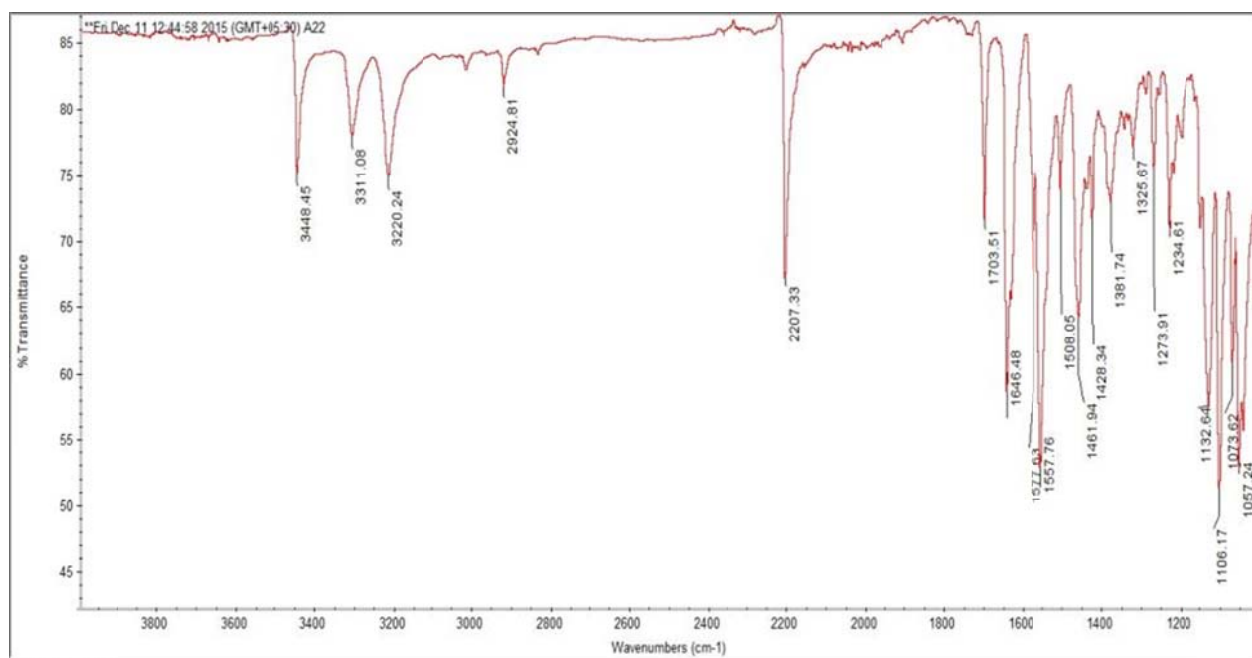

Figure 90. FT-IR spectrum of 1w



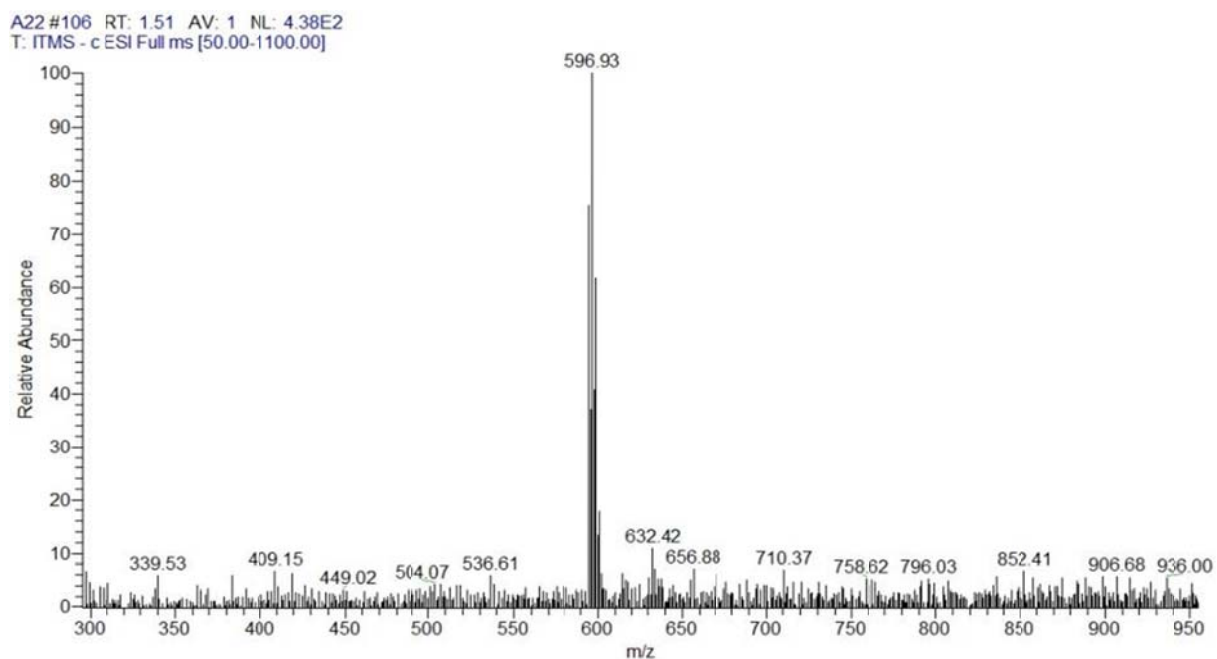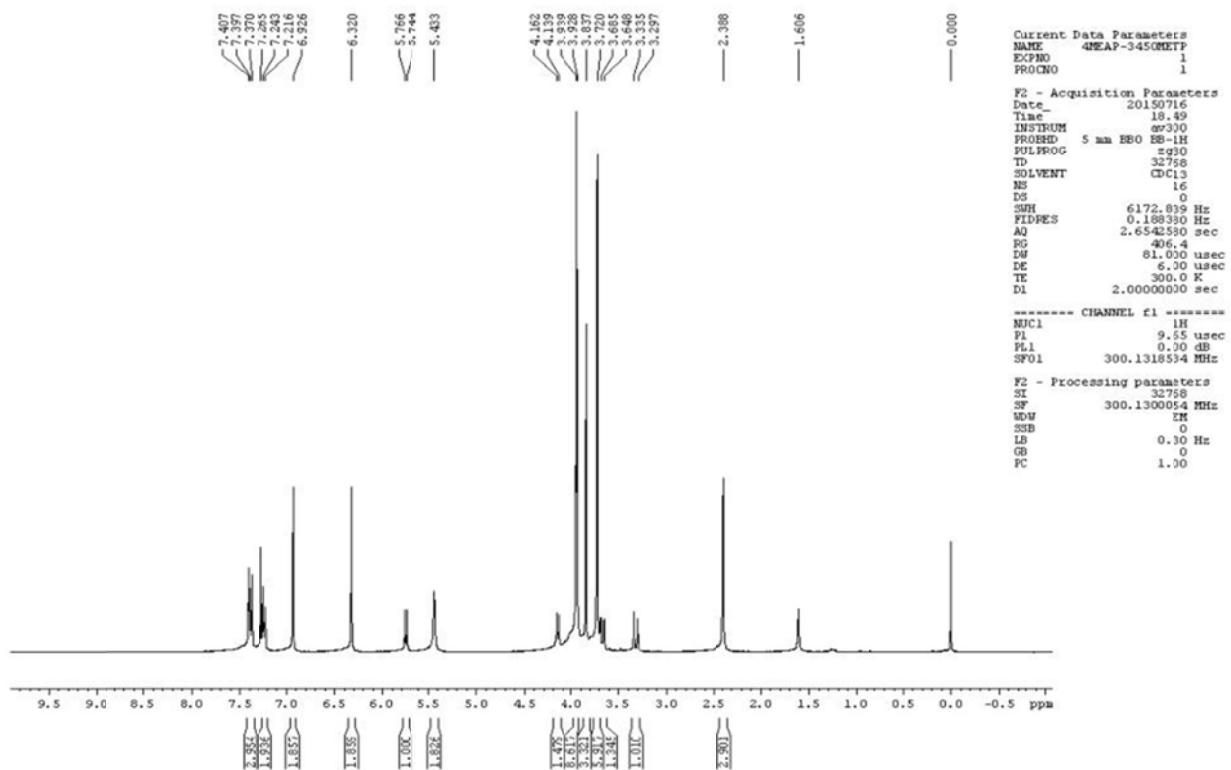

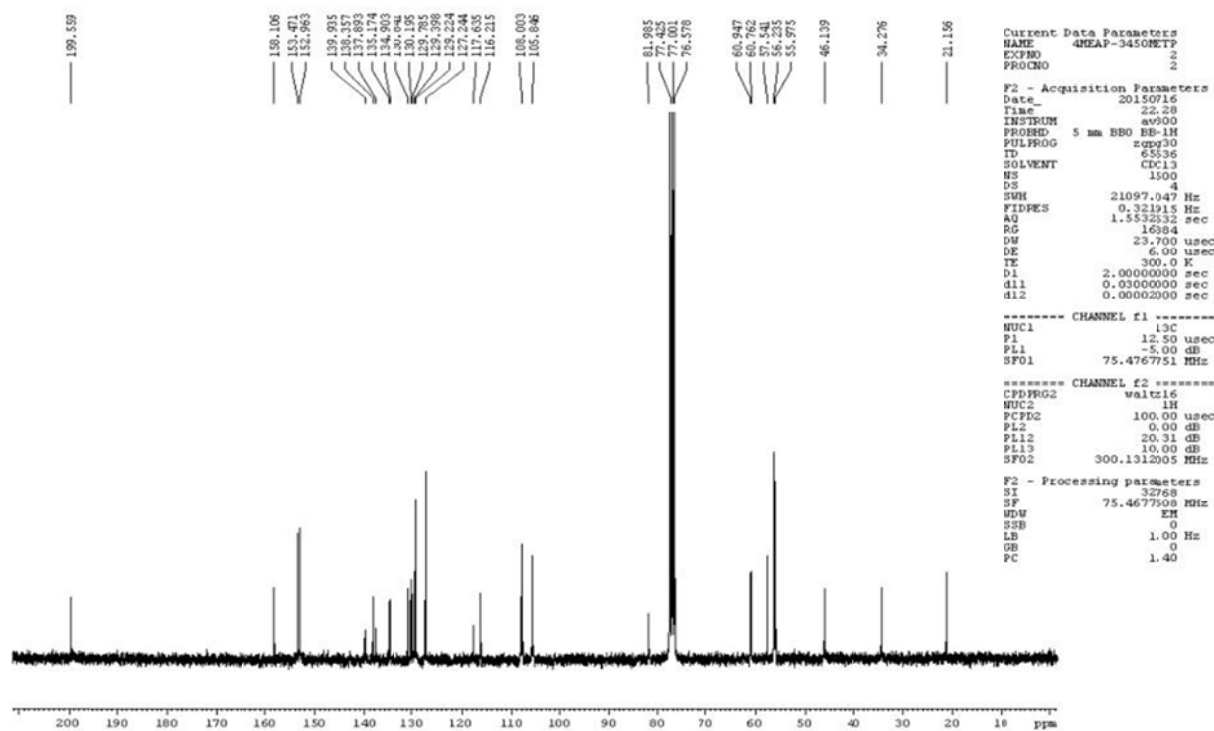

Figure 93.  $^{13}\text{C}$  NMR spectrum of **1x**

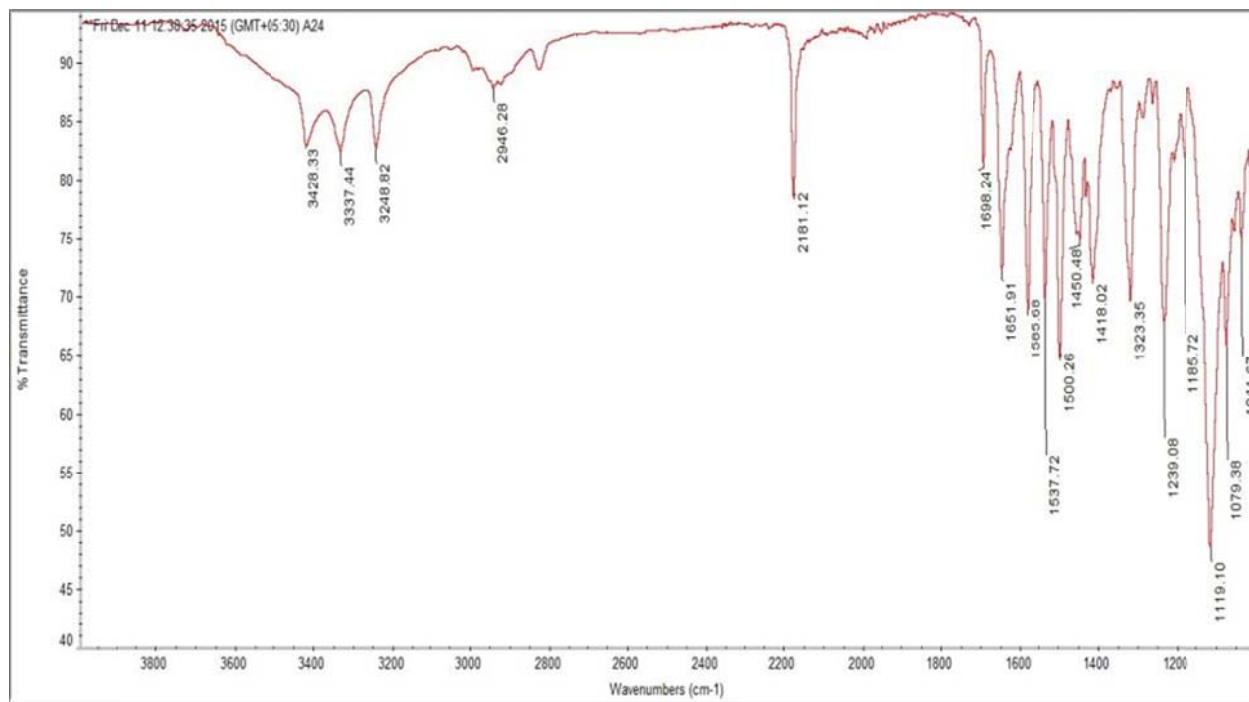

Figure 94. FT-IR spectrum of **1x**

A24 #28 RT: 0.39 AV: 1 NL: 8.11E2  
T: ITMS - c ESI Full ms [50.00-1100.00]

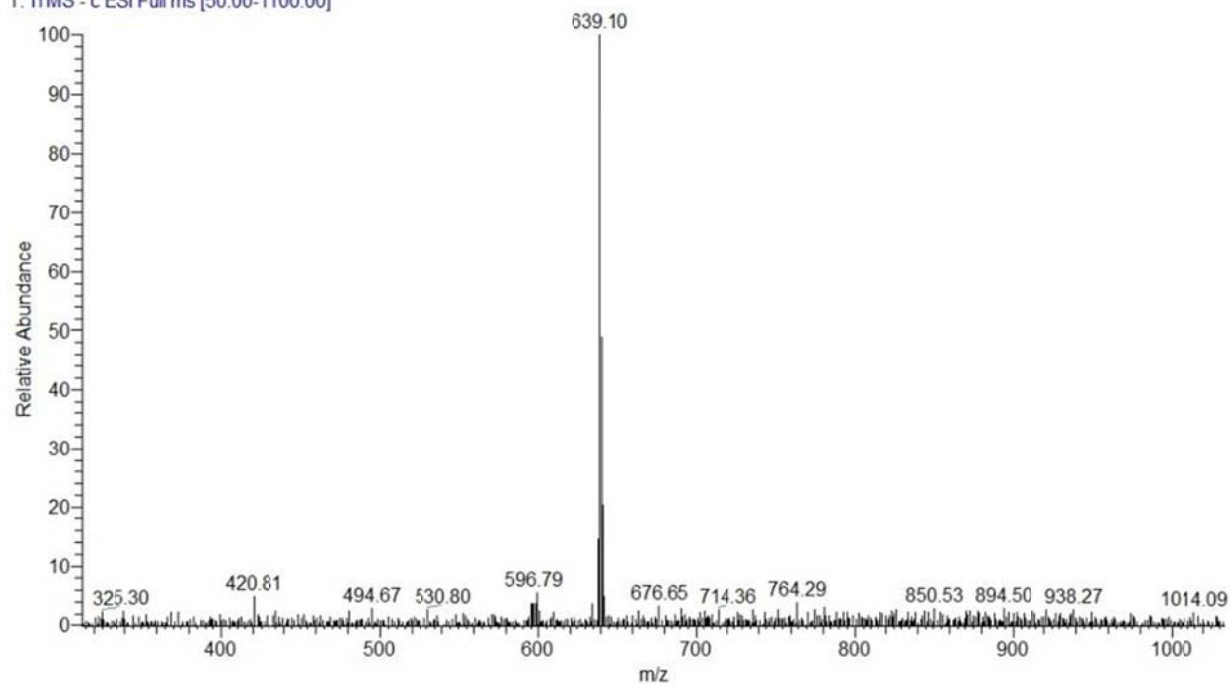

**Figure 95.** ESI-massof **3x**

## Crystallographic data of **1v**

The compound **1v** crystallized in the triclinic crystal system with two molecules in the unit cell (**Table 1**). The 2-bromobenzylidene and 2-bromophenyl rings are oriented with an angle of 75.9(1)° and the p-tolyl is making angles of 73.3(1) and 80.5(1)° with 2-bromobenzylidene and 2-bromophenyl rings, respectively. The molecular structure features an intramolecular N-H...O hydrogen bond which gives the conformational stability for the molecule (**Table 2**). Further, the crystal packing is stabilized through weak N-H...S and C-H...Br interactions. One of the C-H...S interaction in the crystal lattice leads to an infinite chain C(5) motif extending along the *a*-axis of the unit cell. One of the C-H...Br interaction leads to ring R<sub>2</sub><sup>2</sup>(24) motif. (**Figures 96 and 97**)

**Table 1.** Crystallographic data of **1v**

|                                   |                                                                    |
|-----------------------------------|--------------------------------------------------------------------|
| Empirical formula                 | C <sub>30</sub> H <sub>22</sub> Br <sub>2</sub> N <sub>2</sub> O S |
| Formula weight                    | 618.37                                                             |
| Temperature                       | 293(2) K                                                           |
| Wavelength                        | 0.71073 Å                                                          |
| Crystal system, space group       | Triclinic, P-1                                                     |
| Unit cell dimensions              | $a = 7.8301(4) \text{ Å}$ $\alpha = 76.797(9)^\circ$               |
|                                   | $b = 9.9382(6) \text{ Å}$ $\beta = 83.778(8)^\circ$                |
|                                   | $c = 18.0845(11) \text{ Å}$ $\gamma = 77.976(6)^\circ$             |
| Volume                            | 1337.29(15) Å <sup>3</sup>                                         |
| Z, Calculated density             | 2, 1.536 Mg/m <sup>3</sup>                                         |
| Absorption coefficient            | 3.135 mm <sup>-1</sup>                                             |
| F(000)                            | 620                                                                |
| Crystal size                      | 0.22 x 0.16 x 0.18 mm <sup>3</sup>                                 |
| Theta range for data collection   | 2.144 to 24.995°                                                   |
| Limiting indices                  | $-9 \leq h \leq 9$ , $-11 \leq k \leq 11$ , $-21 \leq l \leq 21$   |
| Reflections collected / unique    | 25914 / 4709 [R(int) = 0.0313]                                     |
| Completeness to theta = 25.242°   | 97.4%                                                              |
| Refinement method                 | Full-matrix least-squares on F <sup>2</sup>                        |
| Data / restraints / parameters    | 4709 / 0 / 326                                                     |
| Goodness-of-fit on F <sup>2</sup> | 1.120                                                              |
| Final R indices [I > 2sigma(I)]   | R1 = 0.0592, wR2 = 0.2033                                          |
| R indices (all data)              | R1 = 0.0713, wR2 = 0.2136                                          |
| Largest diff. peak and hole       | 4.038 and -0.472 e. Å <sup>-3</sup>                                |

**Table 2.** Hydrogen bonds geometry of **1v**

| D-H...A (Å, °)         | d(D-H) (Å) | d(H...A) (Å) | d(D...A) (Å) | <(DHA) (°) |
|------------------------|------------|--------------|--------------|------------|
| C(2)-H(2)...Br(2)#1    | 0.93       | 2.96         | 3.750(6)     | 143.1      |
| C(11)-H(11B)...Br(1)#2 | 0.97       | 3.13         | 3.670(6)     | 117.0      |
| N(1)-H(1A)...S(1)#3    | 0.86       | 2.88         | 3.535(6)     | 134.4      |
| N(1)-H(1B)...O(1)      | 0.86       | 2.41         | 2.830(8)     | 110.5      |
| N(1)-H(1B)...S(1)#2    | 0.86       | 3.03         | 3.748(6)     | 142.9      |

Equivalent positions: #1 -x+2,-y,-z+1 #2 -x+1,-y+1,-z+1 #3 x-1,y,z

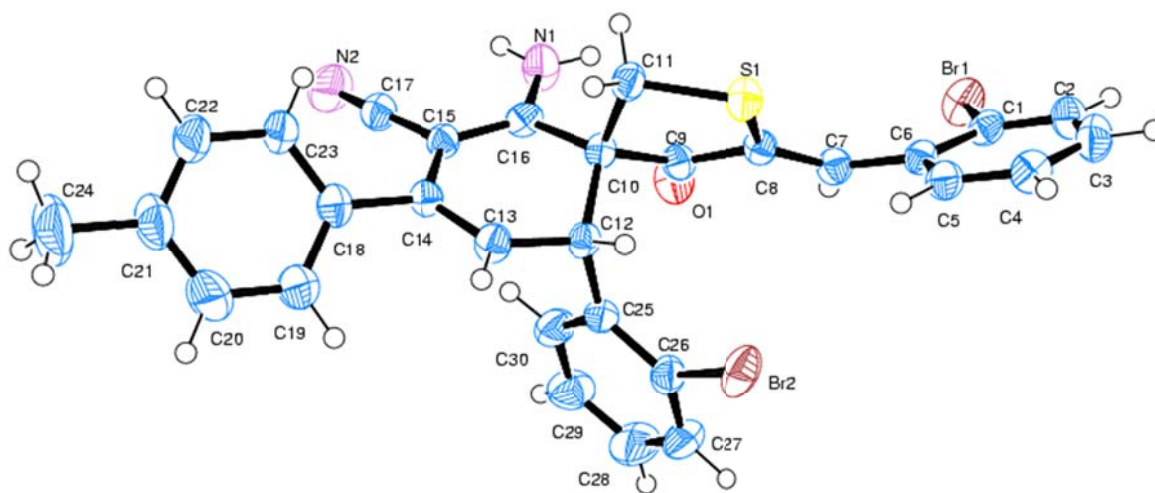**Figure 96.** The molecular structure of compound **1v** with the numbering scheme for the atoms and 50% probability displacement ellipsoids

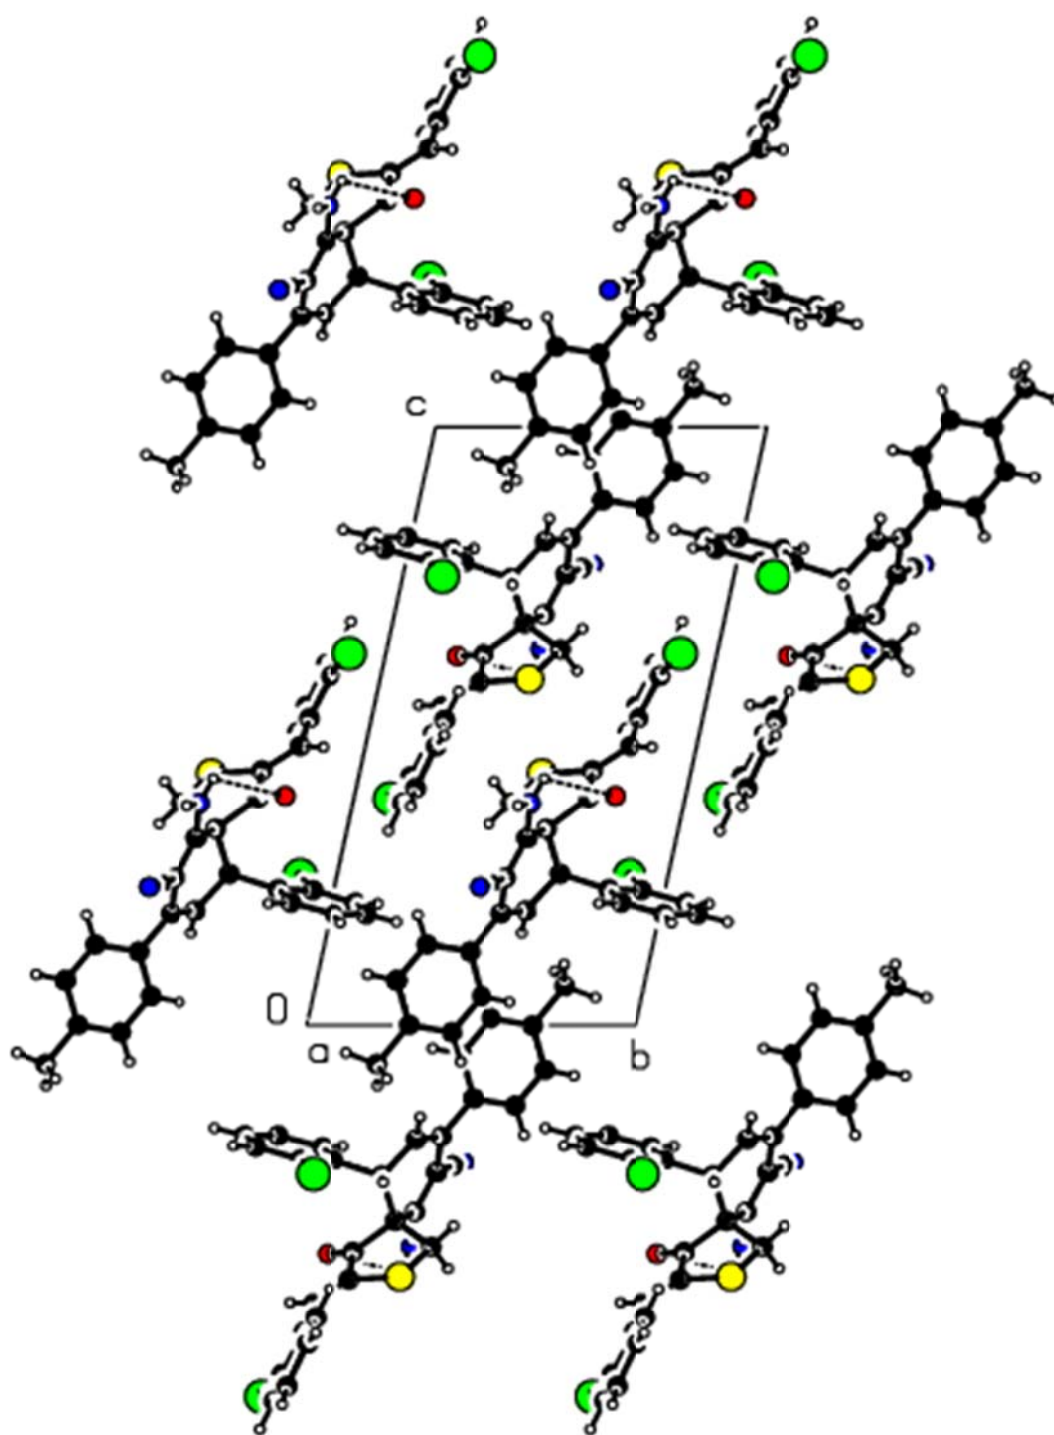

**Figure 97.** Packing diagram of **1v**
